# Supplementary material for: Non-specific low back pain: cross-sectional study of 11,423 children and youth and the association with the perception of heaviness in carrying of schoolbags
Source: PeerJ. 2021 May 4;9:e11220. doi: 10.7717/peerj.11220 (PMC8103923; doi:10.7717/peerj.11220)
Supplement: Supplemental Information 1 [file peerj-09-11220-s001.xlsx]

## Sheet: All
RespondentID	Gender	Age	Body weight	Body height	Backpack weight	Presence of NLBP
					0=adequate; 1=excess of weight	0=no; 1=yes
1	Female	16	48	1.64	1	1
2	Female	18	62.2	1.72	1	1
3	Female	17	70	1.75	1	1
4	Male	14	82	1.73	1	1
5	Female	17	61.5	1.65	1	1
6	Female	17	50	1.58	0	1
7	Female	17	51	1.69	1	1
8	Female	19	63	1.6	1	1
9	Female	17	58	1.69	0	1
10	Female	18	55	1.59	0	1
11	Female	16	65	1.69	0	1
12	Female	19	50	1.58	1	1
13	Female	19	62	1.69	1	1
14	Female	15	63	1.77	1	1
15	Female	15	41	1.5	1	1
16	Female	17	52	1.63	0	1
17	Female	17	57	1.6	1	1
18	Female	18	65	1.67	1	1
19	Female	17	51	1.7	0	1
20	Female	17	45	1.6	1	1
21	Female	18	65	1.65	1	1
22	Female	19	64.3	1.65	1	1
23	Female	18	49	1.65	1	1
24	Female	15	55	1.68	0	1
25	Female	18	49	1.69	1	1
26	Female	16	63	1.62	0	1
27	Female	19	55	1.64	0	1
28	Female	15	58	1.63	1	1
29	Male	18	76	1.69	0	1
30	Female	17	61	1.65	0	1
31	Female	17	63	1.66	1	1
32	Female	18	66	1.63	1	1
33	Female	14	38	1.6	0	1
34	Female	14	59	1.62	1	1
35	Female	14	43	1.65	0	1
36	Female	18	60	1.67	0	1
37	Female	17	54	1.66	0	1
38	Female	16	66	1.73	0	1
39	Female	17	61.5	1.54	1	1
40	Female	15	54	1.76	1	1
41	Female	19	64.3	1.72	1	1
42	Female	15	60	1.71	0	1
43	Female	14	67	1.67	1	1
44	Female	17	58	1.69	1	1
45	Female	19	54	1.66	0	1
46	Female	17	79	1.7	0	1
47	Female	14	66	1.65	0	1
48	Female	17	70	1.74	0	1
49	Female	15	60	1.71	0	1
50	Female	16	39.5	1.54	0	1
51	Female	17	56	1.67	0	1
52	Female	14	42	1.55	0	1
53	Female	18	80	1.75	1	1
54	Female	17	54	1.73	1	1
55	Female	16	65	1.59	0	1
56	Female	13	50	1.56	1	1
57	Female	16	50	1.7	1	1
58	Female	14	54	1.65	1	1
59	Female	15	61	1.65	0	1
60	Female	14	50	1.6	1	1
61	Female	17	55	1.6	0	1
62	Female	12	37	1.51	1	1
63	Female	19	65	1.75	1	1
64	Female	14	53	1.69	1	1
65	Female	17	51	1.66	1	1
66	Female	15	50	1.61	1	1
67	Female	15	58	1.86	1	1
68	Female	14	47	1.52	1	1
69	Female	17	44.5	1.6	1	1
70	Female	13	55	1.6	1	1
71	Female	19	54	1.7	0	1
72	Female	18	58	1.65	1	1
73	Female	18	60	1.67	0	1
74	Female	17	55	1.68	1	1
75	Female	14	58	1.72	1	1
76	Female	13	51	1.67	0	1
77	Male	17	47	1.63	0	1
78	Female	14	57	1.55	1	1
79	Female	19	46	1.6	0	1
80	Female	19	64.3	1.64	0	1
81	Female	18	60	1.65	1	1
82	Female	19	57	1.67	0	1
83	Female	18	59	1.71	0	1
84	Female	17	75	1.64	1	1
85	Female	17	52	1.6	0	1
86	Female	18	62	1.84	0	1
87	Female	17	54	1.63	0	1
88	Female	15	47	1.64	1	1
89	Female	15	53	1.63	1	1
90	Female	17	49	1.63	1	1
91	Female	19	65	1.75	0	1
92	Female	14	53.2	1.65	0	1
93	Female	17	65	1.68	0	1
94	Female	17	60	1.58	0	1
95	Female	17	54	1.59	1	1
96	Female	14	47	1.64	1	1
97	Female	11	45	1.63	0	1
98	Female	16	55	1.7	1	1
99	Male	18	50	1.72	0	1
100	Female	18	58	1.6	1	1
101	Female	16	45	1.65	0	1
102	Female	13	52	1.6	1	1
103	Female	17	45	1.64	0	1
104	Female	14	60	1.67	1	1
105	Female	16	67	1.67	1	1
106	Female	17	47	1.67	0	1
107	Female	14	63	1.64	1	1
108	Female	14	52	1.67	0	1
109	Female	15	50	1.72	1	1
110	Male	15	76	1.76	1	1
111	Male	18	76	1.84	1	1
112	Female	14	53	1.65	0	1
113	Female	14	52	1.64	1	1
114	Female	19	48	1.68	0	1
115	Female	14	44	1.55	1	1
116	Female	18	60	1.66	0	1
117	Female	19	60	1.7	1	1
118	Female	13	50	1.6	0	1
119	Female	18	90	1.68	0	1
120	Female	18	50	1.7	0	1
121	Female	15	50	1.68	1	1
122	Female	17	59	1.64	1	1
123	Female	17	50	1.67	1	1
124	Female	15	80	1.8	1	1
125	Female	14	53.2	1.63	1	1
126	Female	14	52	1.7	1	1
127	Female	19	44	1.6	1	1
128	Female	17	46	1.64	0	1
129	Female	13	55	1.65	1	1
130	Female	10	30	1.48	0	1
131	Female	14	50	1.64	0	1
132	Female	13	59	1.66	1	1
133	Female	13	50	1.6	1	1
134	Female	15	57	1.69	0	1
135	Female	17	60	1.65	1	1
136	Female	19	54	1.68	0	1
137	Female	11	39.4	1.5	0	1
138	Female	18	57	1.68	1	1
139	Male	14	47	1.75	1	1
140	Female	17	60	1.63	0	1
141	Female	18	46	1.62	1	1
142	Female	14	53	1.66	0	1
143	Female	15	60	1.6	0	1
144	Female	18	62.2	1.75	1	1
145	Female	17	51	1.65	0	1
146	Female	17	65	1.75	1	1
147	Female	15	53	1.57	1	1
148	Female	14	59	1.68	1	1
149	Female	14	50	1.7	1	1
150	Female	13	55	1.6	1	1
151	Female	17	74	1.77	1	1
152	Female	15	50	1.65	0	1
153	Female	15	60	1.75	1	1
154	Female	17	59	1.76	1	1
155	Female	18	53	1.69	0	1
156	Female	17	60	1.61	0	1
157	Female	19	65	1.65	1	1
158	Female	16	58	1.72	1	1
159	Female	18	60	1.7	1	1
160	Female	16	43	1.6	1	1
161	Male	17	92	1.7	1	1
162	Female	18	62.2	1.72	1	1
163	Female	18	59	1.57	1	1
164	Female	12	44.3	1.65	1	1
165	Female	14	50	1.61	1	1
166	Female	18	59	1.68	1	1
167	Female	12	56	1.58	0	1
168	Female	14	46	1.66	1	1
169	Female	17	50	1.65	1	1
170	Male	15	50	1.66	1	1
171	Female	18	50	1.6	0	1
172	Female	19	58	1.6	0	1
173	Female	19	62	1.64	1	1
174	Female	19	55	1.66	1	1
175	Female	17	50	1.63	0	1
176	Female	13	55	1.56	1	1
177	Male	14	46	1.61	0	1
178	Female	18	53	1.62	1	1
179	Female	17	59	1.69	1	1
180	Female	18	67	1.73	1	1
181	Female	15	60	1.73	1	1
182	Female	18	53	1.62	0	1
183	Female	18	56	1.62	0	1
184	Female	15	53	1.73	1	1
185	Female	18	50	1.64	1	1
186	Female	16	62	1.65	1	1
187	Female	18	62	1.69	1	1
188	Female	19	64	1.68	0	1
189	Female	17	48	1.6	0	1
190	Female	15	42	1.62	1	1
191	Female	19	54	1.65	1	1
192	Female	18	48	1.6	0	1
193	Female	18	60	1.68	1	1
194	Female	18	50	1.73	0	1
195	Male	19	55	1.7	1	1
196	Female	13	83	1.64	0	1
197	Female	16	67	1.67	0	1
198	Female	19	70	1.69	1	1
199	Female	17	54.5	1.62	0	1
200	Female	17	56	1.68	0	1
201	Female	19	54	1.63	0	1
202	Female	17	47	1.63	0	1
203	Female	19	49	1.63	1	1
204	Female	19	79	1.7	1	1
205	Female	18	50	1.68	1	1
206	Female	12	50.5	1.64	1	1
207	Female	17	55	1.59	1	1
208	Female	18	59	1.75	0	1
209	Female	18	52	1.6	1	1
210	Female	16	63	1.7	1	1
211	Female	18	64	1.75	1	1
212	Female	19	55	1.66	0	1
213	Female	17	51	1.68	1	1
214	Female	14	50	1.66	1	1
215	Female	13	60	1.7	1	1
216	Female	18	67	1.65	1	1
217	Female	17	53	1.64	1	1
218	Female	17	50	1.6	1	1
219	Female	17	59	1.68	0	1
220	Female	18	55	1.75	0	1
221	Female	18	62	1.65	1	1
222	Female	16	68	1.7	1	1
223	Female	19	53	1.6	1	1
224	Female	16	62	1.65	1	1
225	Female	12	50	1.67	0	1
226	Female	18	50	1.76	1	1
227	Female	16	70	1.72	1	1
228	Female	17	58	1.59	1	1
229	Female	19	51	1.65	1	1
230	Female	18	73	1.7	1	1
231	Female	17	62	1.71	1	1
232	Female	17	85	1.73	1	1
233	Female	14	53.2	1.61	0	1
234	Female	17	60	1.56	1	1
235	Female	19	55	1.75	0	1
236	Female	18	64	1.7	0	1
237	Female	16	62	1.73	1	1
238	Male	18	78	1.81	0	1
239	Female	14	48	1.65	1	1
240	Female	15	45	1.67	0	1
241	Female	14	73	1.75	1	1
242	Female	16	58	1.64	1	1
243	Female	19	58	1.69	1	1
244	Female	15	54	1.72	0	1
245	Female	19	52	1.66	1	1
246	Female	18	50	1.63	0	1
247	Female	15	58.4	1.7	1	1
248	Female	18	62.2	1.72	1	1
249	Female	14	47	1.72	1	1
250	Female	17	62.5	1.8	0	1
251	Female	17	58	1.58	0	1
252	Female	14	42	1.47	1	1
253	Female	19	51	1.74	1	1
254	Female	14	40	1.6	1	1
255	Female	14	66	1.6	1	1
256	Female	18	54	1.78	1	1
257	Female	19	46	1.6	1	1
258	Female	17	51	1.64	1	1
259	Female	17	54	1.6	1	1
260	Male	15	50	1.59	1	1
261	Female	13	80	1.72	0	1
262	Female	18	48	1.66	1	1
263	Female	18	59	1.75	0	1
264	Female	15	80	1.7	0	1
265	Female	17	55	1.7	1	1
266	Female	14	45	1.65	1	1
267	Female	16	55	1.6	1	1
268	Female	14	51	1.72	1	1
269	Female	13	54	1.77	1	1
270	Female	17	60	1.65	0	1
271	Female	18	46	1.63	1	1
272	Female	14	39	1.62	1	1
273	Female	15	58.4	1.7	1	1
274	Female	16	56	1.63	1	1
275	Female	16	54	1.68	1	1
276	Female	15	65	1.71	0	1
277	Female	11	29	1.45	1	1
278	Female	17	55	1.64	1	1
279	Female	17	55	1.69	0	1
280	Female	18	50	1.56	1	1
281	Female	14	45	1.61	1	1
282	Male	18	72	1.77	1	1
283	Female	15	43	1.6	0	1
284	Female	17	54	1.65	1	1
285	Female	14	43.5	1.55	1	1
286	Female	12	48	1.7	0	1
287	Female	19	58	1.8	0	1
288	Female	19	70	1.7	1	1
289	Female	17	57	1.68	0	1
290	Female	15	57	1.73	1	1
291	Female	18	63	1.69	0	1
292	Female	19	56	1.68	1	1
293	Female	16	50	1.5	0	1
294	Female	17	55	1.68	1	1
295	Female	17	63	1.69	1	1
296	Female	16	49	1.6	0	1
297	Female	18	47	1.7	1	1
298	Female	17	67	1.73	1	1
299	Female	18	48	1.68	0	1
300	Female	17	55.5	1.63	0	1
301	Female	19	60	1.65	1	1
302	Female	19	49	1.66	1	1
303	Female	17	58	1.65	1	1
304	Female	17	55	1.7	1	1
305	Female	16	45	1.64	1	1
306	Female	17	53	1.68	1	1
307	Female	18	52	1.6	1	1
308	Female	13	55	1.66	1	1
309	Female	13	55	1.64	1	1
310	Male	19	56	1.74	1	1
311	Female	18	58	1.65	1	1
312	Female	17	54	1.68	1	1
313	Female	17	47	1.68	1	1
314	Female	18	52	1.68	1	1
315	Female	19	40	1.5	1	1
316	Female	17	57	1.7	1	1
317	Female	17	49	1.68	1	1
318	Female	15	52	1.64	1	1
319	Female	11	45	1.65	1	1
320	Female	18	55	1.65	1	1
321	Female	17	65	1.62	0	1
322	Female	18	52	1.62	0	1
323	Female	18	54	1.64	0	1
324	Female	17	45	1.59	0	1
325	Female	17	55	1.72	1	1
326	Female	13	45	1.6	0	1
327	Female	17	48	1.73	1	1
328	Female	19	49	1.68	1	1
329	Female	19	49	1.61	1	1
330	Female	18	63	1.68	1	1
331	Female	15	52	1.62	1	1
332	Female	17	50	1.64	1	1
333	Female	15	44	1.55	1	1
334	Female	19	60	1.7	1	1
335	Female	17	53	1.74	0	1
336	Female	18	65	1.68	1	1
337	Female	16	53	1.7	1	1
338	Female	15	60	1.78	1	1
339	Female	15	45	1.68	1	1
340	Female	14	57	1.6	0	1
341	Male	18	54	1.62	0	1
342	Male	15	58.4	1.7	0	1
343	Female	16	52	1.72	1	1
344	Female	16	55	1.78	1	1
345	Female	16	65	1.53	1	1
346	Female	15	70	1.76	0	1
347	Female	12	52	1.65	1	1
348	Female	16	60	1.67	1	1
349	Female	16	64	1.77	1	1
350	Female	15	52	1.55	1	1
351	Female	17	63	1.73	1	1
352	Female	18	47	1.61	1	1
353	Female	19	65	1.7	1	1
354	Female	13	45	1.78	1	1
355	Female	13	52	1.68	0	1
356	Female	19	49	1.68	1	1
357	Female	16	75	1.7	1	1
358	Female	17	66	1.78	0	1
359	Female	15	56	1.68	1	1
360	Female	18	68	1.74	0	1
361	Female	15	51	1.69	0	1
362	Female	17	47	1.6	1	1
363	Male	14	60	1.72	1	1
364	Female	19	56	1.67	1	1
365	Female	17	61.5	1.65	1	1
366	Female	13	60	1.68	1	1
367	Female	14	48	1.66	1	1
368	Female	12	41	1.5	0	1
369	Female	18	60	1.71	0	1
370	Female	19	65	1.6	1	1
371	Female	17	58	1.78	0	1
372	Female	17	50	1.64	0	1
373	Female	16	50	1.58	1	1
374	Female	15	55	1.68	0	1
375	Female	19	50	1.59	1	1
376	Female	14	50	1.59	1	1
377	Female	17	60	1.68	1	1
378	Female	17	60	1.68	0	1
379	Female	16	56	1.66	1	1
380	Female	16	65	1.73	1	1
381	Female	14	53	1.7	1	1
382	Female	18	43	1.53	0	1
383	Female	15	57	1.74	0	1
384	Female	17	60	1.68	1	1
385	Female	17	68	1.62	0	1
386	Female	14	53	1.7	1	1
387	Female	13	42	1.6	0	1
388	Female	16	58	1.65	1	1
389	Female	17	42	1.6	0	1
390	Female	17	61	1.71	0	1
391	Female	17	55	1.69	0	1
392	Female	19	50	1.65	0	1
393	Female	18	61	1.55	1	1
394	Female	17	60	1.65	1	1
395	Female	18	54	1.68	0	1
396	Female	13	45	1.53	0	1
397	Female	19	55	1.6	1	1
398	Female	17	45	1.6	1	1
399	Female	19	61	1.68	1	1
400	Female	19	54	1.7	1	1
401	Female	13	44	1.6	0	1
402	Female	19	68	1.64	1	1
403	Female	17	53	1.6	1	1
404	Female	17	60	1.69	0	1
405	Female	18	76	1.8	0	1
406	Female	15	48	1.58	0	1
407	Female	17	52	1.68	1	1
408	Female	18	51	1.6	0	1
409	Female	17	58	1.69	1	1
410	Female	19	86	1.75	0	1
411	Female	17	50	1.7	1	1
412	Female	17	44	1.64	0	1
413	Female	18	60	1.67	1	1
414	Female	14	43	1.6	0	1
415	Female	19	43	1.61	1	1
416	Female	18	80	1.8	1	1
417	Female	17	65	1.68	0	1
418	Female	19	52	1.6	1	1
419	Female	19	55	1.7	1	1
420	Female	16	58	1.72	0	1
421	Female	19	60	1.7	0	1
422	Female	19	78	1.72	1	1
423	Female	18	70	1.68	1	1
424	Female	18	56	1.64	0	1
425	Female	18	50	1.71	0	1
426	Female	17	46	1.61	1	1
427	Female	19	72	1.6	1	1
428	Female	18	60	1.63	1	1
429	Female	12	50	1.56	0	1
430	Female	18	58	1.64	0	1
431	Female	18	41	1.6	1	1
432	Female	19	75	1.69	1	1
433	Female	18	44	1.58	0	1
434	Female	13	41	1.58	1	1
435	Female	19	65	1.65	1	1
436	Female	14	64	1.59	1	1
437	Female	18	57	1.69	1	1
438	Female	15	55	1.65	0	1
439	Female	14	40	1.45	1	1
440	Female	15	64	1.78	1	1
441	Female	17	61.5	1.77	0	1
442	Female	17	52	1.65	1	1
443	Female	17	79	1.73	1	1
444	Female	19	45	1.65	1	1
445	Female	16	52	1.68	0	1
446	Female	19	61	1.7	1	1
447	Female	14	64	1.6	0	1
448	Female	18	55	1.62	0	1
449	Female	14	51	1.7	1	1
450	Male	18	55	1.59	0	1
451	Female	17	50	1.6	1	1
452	Female	18	56	1.67	0	1
453	Female	17	53	1.66	1	1
454	Female	19	64.3	1.7	1	1
455	Female	16	66	1.69	1	1
456	Female	16	60	1.67	1	1
457	Female	18	53	1.6	1	1
458	Female	13	55	1.68	1	1
459	Female	18	54	1.55	0	1
460	Male	14	48	1.59	1	1
461	Female	18	50	1.63	1	1
462	Female	19	64.3	1.72	1	1
463	Female	19	49	1.56	1	1
464	Female	18	56	1.65	1	1
465	Female	18	62.2	1.7	0	1
466	Female	17	59	1.6	1	1
467	Female	19	64.3	1.65	0	1
468	Female	18	62	1.76	1	1
469	Female	15	47	1.55	0	1
470	Male	18	70	1.75	0	1
471	Female	19	64.3	1.66	0	1
472	Female	15	58.4	1.7	0	1
473	Female	17	86	1.71	1	1
474	Male	18	60	1.7	0	1
475	Female	18	68	1.8	1	1
476	Female	14	50	1.7	1	1
477	Female	19	53	1.71	0	1
478	Female	14	52	1.6	1	1
479	Female	17	58	1.64	0	1
480	Female	19	65	1.71	1	1
481	Female	17	62	1.7	0	1
482	Female	16	52	1.64	0	1
483	Female	17	65	1.7	1	1
484	Female	17	56	1.71	1	1
485	Female	14	53.2	1.65	1	1
486	Female	18	48	1.71	1	1
487	Female	14	50	1.53	1	1
488	Female	14	34	1.65	0	1
489	Female	18	50	1.7	1	1
490	Female	18	52	1.69	0	1
491	Female	16	56	1.6	0	1
492	Female	13	50	1.6	1	1
493	Female	18	55	1.69	0	1
494	Female	18	52	1.63	1	1
495	Female	18	60	1.6	0	1
496	Female	16	55	1.63	1	1
497	Male	17	70	1.78	1	1
498	Female	14	45	1.58	1	1
499	Female	16	59	1.69	0	1
500	Female	18	55	1.67	0	1
501	Female	15	58.4	1.69	1	1
502	Female	15	50	1.65	0	1
503	Female	15	65	1.67	1	1
504	Female	12	50	1.68	1	1
505	Male	17	70	1.85	0	1
506	Female	19	72	1.65	1	1
507	Female	19	50	1.69	0	1
508	Female	12	40	1.56	0	1
509	Female	15	58.4	1.89	1	1
510	Female	14	53.2	1.7	1	1
511	Female	18	59	1.7	1	1
512	Female	15	50	1.73	1	1
513	Female	18	63	1.75	1	1
514	Female	15	70	1.65	1	1
515	Male	14	50	1.7	1	1
516	Female	16	63	1.8	1	1
517	Female	14	69	1.6	1	1
518	Female	17	47	1.56	1	1
519	Male	11	36	1.41	1	1
520	Male	18	100	2	1	1
521	Female	17	56	1.69	1	1
522	Male	11	32	1.38	0	1
523	Male	14	53.2	1.65	1	1
524	Female	18	52	1.7	0	1
525	Male	15	53	1.7	1	1
526	Female	18	47	1.6	0	1
527	Female	19	70	1.69	0	1
528	Female	18	56	1.68	1	1
529	Female	15	76	1.73	1	1
530	Female	18	45	1.6	1	1
531	Female	18	56	1.67	1	1
532	Female	17	65	1.68	1	1
533	Female	15	50	1.69	0	1
534	Female	16	54	1.4	0	1
535	Female	14	49	1.7	1	1
536	Female	15	56	1.65	1	1
537	Female	18	42	1.6	1	1
538	Female	15	49	1.7	0	1
539	Female	15	50	1.65	1	1
540	Female	18	65	1.65	1	1
541	Female	14	50	1.68	0	1
542	Female	19	55	1.66	1	1
543	Female	18	66	1.65	1	1
544	Female	17	61	1.81	0	1
545	Female	15	57	1.6	1	1
546	Female	17	58	1.63	1	1
547	Female	15	55	1.57	1	1
548	Female	18	52	1.6	0	1
549	Female	15	70	1.65	1	1
550	Female	17	57	1.77	0	1
551	Female	14	53.2	1.65	1	1
552	Female	18	60	1.64	1	1
553	Female	14	46	1.64	1	1
554	Female	18	55	1.7	1	1
555	Female	18	55	1.64	0	1
556	Female	15	64	1.75	1	1
557	Male	17	56	1.77	0	1
558	Female	12	36	1.53	1	1
559	Female	17	51	1.62	0	1
560	Male	14	64	1.78	1	1
561	Female	19	51	1.7	1	1
562	Female	19	62	1.53	1	1
563	Female	17	68	1.68	1	1
564	Female	17	46	1.59	0	1
565	Female	15	52	1.73	1	1
566	Female	17	54	1.65	1	1
567	Female	17	49	1.64	1	1
568	Female	17	61.5	1.72	1	1
569	Female	18	54	1.69	1	1
570	Female	18	56	1.76	1	1
571	Female	19	59	1.69	0	1
572	Male	15	65	1.85	0	1
573	Female	19	64.3	1.77	0	1
574	Male	15	48	1.71	0	1
575	Female	14	53.2	1.7	1	1
576	Female	18	55	1.73	1	1
577	Female	17	51	1.69	0	1
578	Female	16	53	1.72	1	1
579	Female	18	73	1.77	1	1
580	Female	18	54	1.7	1	1
581	Female	17	60	1.83	1	1
582	Female	12	55	1.55	0	1
583	Female	19	49	1.62	1	1
584	Female	18	55	1.65	1	1
585	Female	17	65	1.65	0	1
586	Female	13	65	1.73	1	1
587	Female	19	70	1.77	1	1
588	Female	19	48	1.65	1	1
589	Female	17	61.5	1.72	1	1
590	Female	17	50.5	1.68	1	1
591	Female	14	60	1.65	0	1
592	Female	17	54	1.66	1	1
593	Female	14	52	1.59	1	1
594	Female	13	48	1.6	0	1
595	Female	11	58	1.65	1	1
596	Female	17	43	1.6	1	1
597	Female	19	65	1.7	0	1
598	Female	16	47	1.63	1	1
599	Female	15	69	1.78	0	1
600	Male	17	70	1.8	0	1
601	Male	18	80	1.86	0	1
602	Female	14	55	1.75	0	1
603	Female	15	62	1.78	0	1
604	Female	18	49	1.65	0	1
605	Female	15	45	1.55	1	1
606	Female	14	45	1.66	1	1
607	Female	17	52	1.62	1	1
608	Female	16	53	1.67	1	1
609	Female	17	51	1.62	0	1
610	Female	16	54	1.72	1	1
611	Female	16	70	1.65	0	1
612	Female	13	54	1.6	1	1
613	Male	15	65	1.8	0	1
614	Female	17	56	1.65	0	1
615	Male	16	72	1.78	0	1
616	Female	19	55	1.7	1	1
617	Male	14	40	1.6	1	1
618	Male	15	66	1.75	1	1
619	Male	16	66	1.84	1	1
620	Female	14	64	1.68	0	1
621	Female	17	61.5	1.6	0	1
622	Female	14	37	1.55	1	1
623	Female	14	40	1.6	0	1
624	Female	18	49	1.66	0	1
625	Female	18	55	1.61	0	1
626	Male	14	49	1.67	1	1
627	Female	18	60	1.66	0	1
628	Female	14	59	1.73	1	1
629	Female	12	55	1.65	1	1
630	Female	17	70	1.71	0	1
631	Female	14	58	1.7	0	1
632	Female	13	41	1.56	0	1
633	Male	14	64	1.65	1	1
634	Male	10	35	1.39	1	1
635	Female	15	69	1.71	1	1
636	Female	17	47	1.53	1	1
637	Female	12	35	1.52	0	1
638	Male	12	41	1.41	1	1
639	Female	18	58	1.7	0	1
640	Female	18	55	1.63	0	1
641	Female	11	38	1.48	1	1
642	Male	14	87	1.85	1	1
643	Male	17	62	1.76	1	1
644	Female	18	58	1.64	1	1
645	Male	14	60	1.74	1	1
646	Male	19	76	1.81	1	1
647	Male	14	58	1.77	1	1
648	Male	18	71	1.84	1	1
649	Female	18	55	1.6	1	1
650	Female	17	47	1.6	0	1
651	Male	15	70	1.85	1	1
652	Female	14	37	1.59	1	1
653	Male	16	54	1.78	0	1
654	Male	17	85	1.8	1	1
655	Female	18	53	1.56	1	1
656	Female	18	44.5	1.57	1	1
657	Male	15	58.4	1.79	0	1
658	Male	14	47	1.65	0	1
659	Female	11	31	1.47	0	1
660	Female	15	55	1.65	1	1
661	Female	13	43	1.52	1	1
662	Male	17	74	1.93	0	1
663	Male	18	70	1.8	1	1
664	Female	18	60	1.67	0	1
665	Male	17	90	2.05	0	1
666	Male	18	75	1.75	0	1
667	Male	17	60	1.73	1	1
668	Female	18	60	1.63	0	1
669	Male	18	82	1.7	1	1
670	Male	17	73	1.81	1	1
671	Male	19	80	1.85	0	1
672	Female	13	42	1.63	0	1
673	Male	15	91	1.91	0	1
674	Male	18	86	1.8	0	1
675	Male	15	64	1.76	1	1
676	Female	14	53.2	1.65	0	1
677	Male	17	95	1.77	0	1
678	Female	15	60	1.65	1	1
679	Male	13	75	1.75	0	1
680	Male	17	60	1.75	0	1
681	Female	13	65	1.7	0	1
682	Female	18	44	1.57	1	1
683	Male	15	65	1.8	1	1
684	Male	15	70	1.82	0	1
685	Male	18	90	1.8	0	1
686	Male	19	70	1.77	0	1
687	Female	14	50	1.53	0	1
688	Female	13	60	1.6	0	1
689	Female	12	40	1.6	1	1
690	Male	13	46	1.55	0	1
691	Male	18	74	1.76	1	1
692	Female	10	37	1.38	0	1
693	Female	12	76	1.56	0	1
694	Male	17	76	1.81	0	1
695	Female	18	50	1.7	0	1
696	Female	16	63	1.6	0	1
697	Female	17	70	1.81	1	1
698	Female	17	47	1.58	1	1
699	Female	19	60	1.69	1	1
700	Female	19	62	1.73	0	1
701	Female	17	50	1.58	0	1
702	Female	18	53	1.64	0	1
703	Female	19	50	1.7	1	1
704	Female	16	58	1.74	1	1
705	Female	19	42	1.6	1	1
706	Female	18	54	1.67	0	1
707	Female	18	66	1.74	1	1
708	Male	18	80	1.82	1	1
709	Female	18	52	1.68	1	1
710	Male	17	64	1.83	0	1
711	Female	14	76	1.62	1	1
712	Female	17	60	1.64	1	1
713	Male	14	60	1.57	0	1
714	Female	15	48.5	1.7	1	1
715	Male	18	79	1.8	0	1
716	Female	13	60	1.7	0	1
717	Male	18	66	1.73	1	1
718	Male	10	28	1.4	0	1
719	Female	14	52	1.63	0	1
720	Male	17	88	1.8	0	1
721	Male	11	52	1.52	0	1
722	Male	19	64.3	1.72	1	1
723	Male	17	75	1.72	1	1
724	Female	18	49	1.56	0	1
725	Male	17	77	1.7	0	1
726	Female	14	39	1.56	1	1
727	Male	17	90	1.77	1	1
728	Female	17	49	1.63	0	1
729	Female	18	52	1.6	1	1
730	Male	17	86	1.82	0	1
731	Male	14	65	1.76	0	1
732	Female	17	56	1.62	0	1
733	Male	17	76	1.82	0	1
734	Female	19	57	1.72	0	1
735	Male	18	69	1.75	0	1
736	Male	14	65	1.8	0	1
737	Male	12	45	1.51	1	1
738	Male	17	81	1.84	0	1
739	Male	18	64	1.7	0	1
740	Female	15	58.4	1.74	0	1
741	Female	14	60	1.64	1	1
742	Male	13	44	1.57	0	1
743	Female	17	51	1.6	0	1
744	Male	14	60	1.8	0	1
745	Male	18	66	1.8	0	1
746	Female	14	60	1.63	0	1
747	Male	17	66	1.85	0	1
748	Female	15	48	1.63	1	1
749	Male	19	70	1.85	1	1
750	Male	12	40.8	1.52	1	1
751	Male	18	74	1.88	0	1
752	Male	17	59	1.8	0	1
753	Male	16	62	1.73	0	1
754	Male	18	80	1.78	1	1
755	Male	17	62	1.85	1	1
756	Male	15	75	1.9	0	1
757	Female	15	58	1.69	0	1
758	Male	12	50	1.61	0	1
759	Male	19	70	1.85	0	1
760	Female	18	58	1.55	0	1
761	Female	14	57	1.6	1	1
762	Female	19	54	1.71	1	1
763	Male	17	95	1.87	0	1
764	Male	16	56	1.74	1	1
765	Male	14	70	1.85	0	1
766	Male	16	65	1.89	1	1
767	Female	17	59	1.7	0	1
768	Female	18	48	1.55	1	1
769	Female	17	52	1.63	1	1
770	Female	18	60	1.73	0	1
771	Female	17	49	1.58	1	1
772	Male	18	67	1.8	0	1
773	Male	18	64	1.81	1	1
774	Male	18	100	1.8	1	1
775	Male	18	71	1.76	0	1
776	Male	16	62	1.72	1	1
777	Female	18	62.2	1.72	1	1
778	Male	17	70	1.83	0	1
779	Male	17	61.5	1.72	0	1
780	Male	17	68	1.82	0	1
781	Male	14	54	1.68	1	1
782	Male	18	61	1.76	0	1
783	Male	18	84	1.94	1	1
784	Male	18	67	1.84	0	1
785	Female	14	35	1.55	0	1
786	Female	15	46	1.62	1	1
787	Female	14	48	1.54	1	1
788	Male	15	56	1.66	0	1
789	Male	16	73	1.83	0	1
790	Female	16	50	1.69	1	1
791	Female	16	57	1.73	0	1
792	Male	18	73	1.9	0	1
793	Male	14	75	1.67	1	1
794	Male	18	60	1.74	1	1
795	Male	19	65	1.77	1	1
796	Female	19	53	1.65	1	1
797	Female	14	46	1.6	1	1
798	Male	17	61.5	1.78	1	1
799	Male	17	70	1.8	0	1
800	Male	17	82	1.94	1	1
801	Female	17	48	1.55	1	1
802	Female	12	44.3	1.65	0	1
803	Female	19	51	1.73	0	1
804	Female	16	80	1.65	1	1
805	Female	17	43	1.63	1	1
806	Female	16	52	1.63	1	1
807	Female	19	58	1.69	1	1
808	Female	17	51	1.67	1	1
809	Female	18	79	1.68	1	1
810	Female	16	68	1.85	1	1
811	Male	14	69	1.77	0	1
812	Female	12	54	1.64	0	1
813	Male	17	67	1.73	1	1
814	Male	18	77	1.85	0	1
815	Female	18	58	1.7	1	1
816	Female	17	61	1.7	1	1
817	Female	17	63	1.73	0	1
818	Male	17	60	1.76	1	1
819	Female	12	47	1.55	0	1
820	Male	17	85	1.93	1	1
821	Female	17	60	1.73	1	1
822	Female	14	49	1.67	1	1
823	Female	17	64	1.63	1	1
824	Male	14	60	1.79	1	1
825	Male	16	65	1.75	0	1
826	Male	17	68	1.76	1	1
827	Female	17	69	1.78	0	1
828	Male	17	65	1.83	1	1
829	Female	14	56	1.55	1	1
830	Male	17	67	1.78	1	1
831	Female	17	55	1.72	0	1
832	Male	17	79	1.85	0	1
833	Female	18	55	1.74	0	1
834	Male	17	75	1.85	1	1
835	Female	14	58	1.55	1	1
836	Female	11	42	1.58	1	1
837	Female	19	55	1.62	1	1
838	Female	18	80	1.7	1	1
839	Male	19	62	1.76	0	1
840	Female	18	57	1.72	1	1
841	Male	18	83	1.82	0	1
842	Male	18	80	1.88	0	1
843	Male	18	55	1.75	0	1
844	Male	17	80	1.76	1	1
845	Male	19	80	1.8	1	1
846	Male	16	58	1.65	0	1
847	Male	18	61	1.75	0	1
848	Female	17	56	1.68	1	1
849	Male	18	75	1.84	1	1
850	Male	17	75	1.85	0	1
851	Male	13	70	1.8	1	1
852	Male	16	87	1.83	1	1
853	Female	17	58	1.67	1	1
854	Female	14	47	1.7	0	1
855	Male	18	56	1.76	1	1
856	Male	17	65	1.75	0	1
857	Female	18	47	1.64	1	1
858	Male	16	64	1.85	0	1
859	Female	19	60	1.6	0	1
860	Female	17	63	1.72	0	1
861	Female	17	47	1.54	1	1
862	Female	17	61	1.67	0	1
863	Male	16	80	1.8	0	1
864	Male	17	61	1.8	0	1
865	Male	16	60	1.71	0	1
866	Male	15	68	1.86	0	1
867	Male	18	89	1.86	0	1
868	Male	11	31	1.41	0	1
869	Male	14	58	1.62	0	1
870	Female	12	40	1.63	0	1
871	Female	14	42	1.56	1	1
872	Male	15	65	1.79	0	1
873	Male	17	61.5	1.72	0	1
874	Female	18	54	1.67	1	1
875	Female	18	55	1.65	0	1
876	Female	19	60	1.63	1	1
877	Female	18	53	1.65	1	1
878	Male	17	68	1.71	0	1
879	Male	14	60	1.74	1	1
880	Female	14	32	1.52	1	1
881	Male	19	80	1.8	1	1
882	Male	19	80	1.8	0	1
883	Female	14	57	1.67	0	1
884	Female	17	55	1.76	1	1
885	Female	18	50	1.65	1	1
886	Male	17	69	1.82	0	1
887	Female	14	40	1.65	1	1
888	Male	17	69.6	1.8	1	1
889	Male	15	67	1.8	0	1
890	Male	17	85	1.83	1	1
891	Male	14	60	1.62	1	1
892	Male	15	65	1.83	1	1
893	Male	15	89	1.76	0	1
894	Female	15	63	1.77	1	1
895	Male	17	67	1.77	1	1
896	Female	14	50	1.6	0	1
897	Male	18	72	1.85	0	1
898	Female	18	62.2	1.72	0	1
899	Female	18	50	1.68	0	1
900	Female	18	60	1.73	0	1
901	Female	19	60	1.7	0	1
902	Female	17	60	1.69	0	1
903	Male	17	73	1.82	1	1
904	Male	18	64	1.75	0	1
905	Male	13	70	1.78	1	1
906	Female	17	51.5	1.63	1	1
907	Female	14	54	1.67	0	1
908	Male	13	50	1.6	1	1
909	Male	16	72	1.84	1	1
910	Male	14	57	1.66	1	1
911	Female	16	56	1.69	1	1
912	Male	18	75	1.72	0	1
913	Female	15	58	1.78	0	1
914	Female	15	56	1.6	0	1
915	Male	15	55	1.68	1	1
916	Female	14	53.2	1.54	0	1
917	Male	18	80	1.8	1	1
918	Female	18	62	1.75	1	1
919	Female	17	53	1.65	1	1
920	Female	17	61.5	1.75	1	1
921	Male	18	83	1.88	1	1
922	Male	17	60	1.7	1	1
923	Male	17	75	1.85	1	1
924	Male	12	46	1.51	1	1
925	Female	18	54	1.64	1	1
926	Female	10	39	1.48	0	1
927	Male	14	50	1.7	0	1
928	Male	16	72	1.82	0	1
929	Female	14	55	1.7	0	1
930	Female	14	64	1.64	0	1
931	Female	19	72	1.72	0	1
932	Female	14	72	1.66	0	1
933	Male	15	74	1.85	1	1
934	Male	14	50	1.67	1	1
935	Female	17	56	1.6	1	1
936	Male	12	44	1.5	0	1
937	Male	17	83	1.94	1	1
938	Male	17	65	1.8	0	1
939	Male	15	82	1.84	0	1
940	Female	19	54	1.74	0	1
941	Female	17	53	1.65	0	1
942	Female	11	59	1.64	1	1
943	Male	18	75	1.8	0	1
944	Male	19	60	1.78	0	1
945	Female	14	50	1.57	0	1
946	Female	14	54	1.6	0	1
947	Female	19	75	1.7	0	1
948	Male	17	60	1.86	0	1
949	Male	17	90	1.9	0	1
950	Male	15	72	1.78	1	1
951	Male	17	74	1.83	0	1
952	Female	17	50	1.72	0	1
953	Female	15	58.4	1.64	1	1
954	Female	13	41	1.61	1	1
955	Male	17	61	1.82	1	1
956	Male	17	80	1.78	0	1
957	Male	14	45	1.58	0	1
958	Female	14	48	1.58	1	1
959	Male	19	75	1.74	1	1
960	Female	14	70	1.7	0	1
961	Female	14	38	1.5	0	1
962	Male	13	63	1.8	0	1
963	Female	16	56	1.63	1	1
964	Male	12	58	1.48	0	1
965	Male	17	75	1.94	1	1
966	Female	15	50	1.61	1	1
967	Male	16	85	1.72	1	1
968	Male	18	72	1.87	1	1
969	Female	18	81	1.81	0	1
970	Male	19	80	1.8	0	1
971	Female	14	45	1.57	1	1
972	Male	15	80	1.82	0	1
973	Female	17	58	1.65	1	1
974	Male	15	66	1.85	0	1
975	Male	18	80	1.8	0	1
976	Female	17	60	1.7	0	1
977	Female	11	54	1.41	0	1
978	Female	14	42	1.59	0	1
979	Male	18	60	1.7	0	1
980	Female	14	36	1.5	0	1
981	Male	17	55	1.74	0	1
982	Female	18	50	1.8	1	1
983	Male	15	81	1.73	0	1
984	Male	12	40	1.52	0	1
985	Female	19	50	1.72	1	1
986	Female	12	36	1.46	0	1
987	Female	16	60	1.69	0	1
988	Female	12	52	1.62	1	1
989	Male	13	49	1.7	0	1
990	Male	16	62	1.72	0	1
991	Male	19	75	1.84	1	1
992	Female	13	40	1.6	1	1
993	Female	12	51	1.62	1	1
994	Male	17	67	1.73	0	1
995	Male	14	49.9	1.65	0	1
996	Female	14	53	1.69	0	1
997	Female	15	65	1.72	1	1
998	Male	18	75	1.68	0	1
999	Male	17	67	1.71	0	1
1000	Male	17	77	1.9	0	1
1001	Male	19	70	1.75	0	1
1002	Male	14	59	1.61	1	1
1003	Female	17	55	1.76	0	1
1004	Female	19	56	1.71	1	1
1005	Male	17	90	1.77	1	1
1006	Male	19	68	1.77	0	1
1007	Male	15	62	1.82	1	1
1008	Male	18	60	1.75	1	1
1009	Male	17	79	1.84	0	1
1010	Male	15	64	1.75	1	1
1011	Female	14	59	1.6	1	1
1012	Male	14	50	1.6	0	1
1013	Male	12	35	1.41	0	1
1014	Male	17	58	1.73	0	1
1015	Female	18	55	1.65	1	1
1016	Male	15	80	1.85	0	1
1017	Male	18	65	1.78	0	1
1018	Male	15	88	1.8	0	1
1019	Male	17	69	1.82	0	1
1020	Female	19	57	1.68	0	1
1021	Male	17	67	1.74	0	1
1022	Male	18	80	1.82	0	1
1023	Male	18	74	1.75	1	1
1024	Male	19	72	1.74	0	1
1025	Male	14	45	1.57	1	1
1026	Female	17	57	1.61	1	1
1027	Female	17	62	1.71	1	1
1028	Male	14	40	1.56	0	1
1029	Male	19	63	1.8	0	1
1030	Male	16	75	1.85	0	1
1031	Male	18	62	1.8	0	1
1032	Female	12	34	1.52	0	1
1033	Female	17	52	1.68	0	1
1034	Male	14	65	1.86	0	1
1035	Female	17	63.5	1.67	1	1
1036	Female	17	56	1.55	0	1
1037	Female	12	52	1.56	0	1
1038	Male	15	63	1.62	1	1
1039	Female	16	52	1.65	1	1
1040	Male	19	70	1.78	0	1
1041	Female	18	70	1.76	1	1
1042	Male	14	51	1.65	1	1
1043	Female	13	55	1.65	1	1
1044	Female	15	44	1.57	0	1
1045	Male	14	50	1.67	1	1
1046	Female	18	80	1.7	1	1
1047	Female	17	50	1.64	0	1
1048	Male	12	44.3	1.57	0	1
1049	Female	18	54	1.7	1	1
1050	Female	14	55	1.7	1	1
1051	Male	12	43	1.66	0	1
1052	Female	17	58	1.66	1	1
1053	Female	18	55	1.68	0	1
1054	Female	14	47	1.61	1	1
1055	Male	18	63	1.65	0	1
1056	Female	15	60	1.63	0	1
1057	Male	17	65	1.73	0	1
1058	Female	11	31.6	1.4	0	1
1059	Male	17	73	1.84	0	1
1060	Male	14	65	1.83	0	1
1061	Male	17	60	1.8	1	1
1062	Female	17	65	1.7	0	1
1063	Male	15	75	1.8	1	1
1064	Male	12	30	1.42	1	1
1065	Female	13	49	1.61	0	1
1066	Male	16	70	1.73	1	1
1067	Male	19	70	1.75	1	1
1068	Male	17	70	1.87	1	1
1069	Female	13	56	1.65	1	1
1070	Female	15	51	1.61	1	1
1071	Female	13	53	1.63	1	1
1072	Male	17	70	1.9	0	1
1073	Male	17	65	1.73	1	1
1074	Male	13	62	1.9	0	1
1075	Female	14	40	1.48	0	1
1076	Female	18	60	1.72	1	1
1077	Female	17	54	1.62	1	1
1078	Male	17	59	1.73	0	1
1079	Male	14	60	1.7	0	1
1080	Male	18	87	1.88	0	1
1081	Female	18	65	1.59	1	1
1082	Female	16	50	1.67	1	1
1083	Female	13	59	1.69	1	1
1084	Male	15	58	1.75	0	1
1085	Male	18	71	1.85	0	1
1086	Female	18	52	1.65	1	1
1087	Female	18	62.2	1.7	0	1
1088	Male	13	65	1.76	0	1
1089	Male	14	75	1.85	0	1
1090	Female	19	74	1.62	1	1
1091	Female	15	49	1.64	0	1
1092	Female	17	51	1.61	1	1
1093	Male	14	55	1.67	0	1
1094	Female	15	62	1.77	0	1
1095	Female	18	60	1.76	1	1
1096	Female	17	54	1.7	1	1
1097	Female	17	60	1.65	0	1
1098	Male	19	90	1.73	0	1
1099	Female	18	63	1.65	1	1
1100	Male	11	37	1.8	1	1
1101	Female	13	50	1.67	1	1
1102	Female	14	53	1.64	0	1
1103	Female	17	50	1.5	0	1
1104	Female	19	50	1.55	1	1
1105	Male	18	64	1.81	0	1
1106	Male	16	68	1.72	1	1
1107	Female	15	65	1.7	0	1
1108	Female	19	59	1.7	1	1
1109	Female	13	45	1.5	0	1
1110	Male	17	80	1.8	1	1
1111	Female	13	75	1.78	1	1
1112	Female	14	50	1.65	0	1
1113	Female	18	51	1.62	0	1
1114	Female	18	60	1.7	1	1
1115	Female	18	53	1.7	1	1
1116	Female	18	54	1.64	1	1
1117	Female	16	55	1.7	1	1
1118	Male	18	89	1.82	0	1
1119	Female	19	42	1.58	1	1
1120	Male	16	75	1.93	1	1
1121	Male	18	73	1.86	1	1
1122	Male	14	54	1.61	1	1
1123	Female	12	36	1.48	0	1
1124	Male	13	58	1.78	0	1
1125	Male	17	60	1.76	0	1
1126	Male	16	57	1.73	0	1
1127	Female	11	45	1.57	0	1
1128	Male	18	75	1.78	0	1
1129	Male	14	65	1.72	0	1
1130	Female	18	70	1.8	0	1
1131	Male	14	50	1.64	1	1
1132	Male	13	55	1.71	0	1
1133	Female	12	43	1.5	1	1
1134	Male	16	52	1.75	0	1
1135	Female	18	60	1.68	0	1
1136	Male	14	61	1.77	1	1
1137	Male	13	69	1.8	1	1
1138	Male	17	66	1.87	0	1
1139	Male	16	67	1.77	1	1
1140	Female	16	53	1.77	1	1
1141	Female	18	58	1.73	0	1
1142	Female	19	54	1.73	1	1
1143	Female	17	53	1.66	0	1
1144	Female	17	58	1.67	1	1
1145	Female	14	50	1.63	1	1
1146	Female	11	47	1.48	1	1
1147	Male	14	80	1.83	1	1
1148	Female	19	48	1.59	1	1
1149	Female	19	57	1.64	0	1
1150	Female	14	51	1.6	0	1
1151	Female	18	50	1.63	0	1
1152	Female	19	57	1.6	0	1
1153	Female	19	64.3	1.68	0	1
1154	Male	19	86	1.82	0	1
1155	Female	18	45	1.67	0	1
1156	Male	16	61	1.77	0	1
1157	Female	15	54	1.65	1	1
1158	Female	11	33	1.5	0	1
1159	Male	18	62	1.8	1	1
1160	Male	19	71	1.87	0	1
1161	Male	13	46.5	1.65	0	1
1162	Female	17	47	1.74	0	1
1163	Female	15	74	1.7	1	1
1164	Male	17	91	1.98	1	1
1165	Male	17	58	1.75	0	1
1166	Female	14	84	1.65	0	1
1167	Female	17	53	1.62	0	1
1168	Male	12	60	1.6	1	1
1169	Female	14	36	1.47	0	1
1170	Female	18	51	1.67	0	1
1171	Male	11	46	1.55	0	1
1172	Male	17	59	1.76	0	1
1173	Male	16	60	1.75	1	1
1174	Male	11	32	1.37	0	1
1175	Male	14	58	1.68	1	1
1176	Male	14	55	1.68	0	1
1177	Male	11	34	1.51	0	1
1178	Female	17	78	1.67	0	1
1179	Female	14	49	1.65	0	1
1180	Male	14	42	1.67	0	1
1181	Male	14	65	1.85	0	1
1182	Male	17	61.5	1.75	1	1
1183	Male	12	41	1.67	0	1
1184	Female	14	42	1.54	0	1
1185	Male	16	67	1.74	0	1
1186	Female	15	60	1.69	1	1
1187	Female	15	58.4	1.7	1	1
1188	Male	12	50	1.7	1	1
1189	Male	18	78	1.88	1	1
1190	Female	17	85	1.73	1	1
1191	Male	13	55	1.6	0	1
1192	Female	15	55	1.61	1	1
1193	Female	16	49	1.6	1	1
1194	Female	14	45	1.55	0	1
1195	Female	18	63	1.75	1	1
1196	Male	17	58	1.79	0	1
1197	Female	14	45	1.6	0	1
1198	Male	17	75	1.8	1	1
1199	Female	16	60	1.69	1	1
1200	Female	15	59	1.6	1	1
1201	Female	15	54	1.65	1	1
1202	Female	15	54	1.64	1	1
1203	Male	13	56	1.6	1	1
1204	Female	14	80	1.72	1	1
1205	Female	18	67	1.65	1	1
1206	Female	18	56	1.63	0	1
1207	Female	14	53	1.62	1	1
1208	Female	17	59	1.61	1	1
1209	Female	18	69	1.72	1	1
1210	Female	15	65	1.6	1	1
1211	Female	17	63	1.65	1	1
1212	Female	18	63	1.69	1	1
1213	Female	14	47	1.62	0	1
1214	Male	14	42	1.62	1	1
1215	Female	13	37	1.54	1	1
1216	Female	16	56	1.6	1	1
1217	Female	18	57	1.7	1	1
1218	Male	17	96	1.93	0	1
1219	Female	17	57	1.72	1	1
1220	Male	18	65	1.8	1	1
1221	Male	10	33	1.43	0	1
1222	Female	16	65	1.7	1	1
1223	Female	12	42	1.52	1	1
1224	Female	14	50	1.6	1	1
1225	Female	13	37	1.52	0	1
1226	Male	18	95	1.88	1	1
1227	Male	12	48	1.59	0	1
1228	Male	18	100	1.8	0	1
1229	Male	17	74	1.78	0	1
1230	Male	17	65	1.83	0	1
1231	Female	17	56	1.74	0	1
1232	Male	11	31	1.4	0	1
1233	Female	19	56	1.73	0	1
1234	Female	18	52	1.67	1	1
1235	Female	15	71	1.6	1	1
1236	Female	16	58	1.7	1	1
1237	Female	17	56	1.67	1	1
1238	Female	18	55	1.75	1	1
1239	Female	19	47.5	1.61	1	1
1240	Female	19	75	1.74	1	1
1241	Male	14	72	1.86	0	1
1242	Male	18	73	1.77	1	1
1243	Male	16	83	1.86	0	1
1244	Female	18	51	1.62	1	1
1245	Male	17	55	1.65	0	1
1246	Female	18	62.2	1.73	1	1
1247	Male	19	72	1.82	1	1
1248	Female	15	65	1.63	1	1
1249	Female	17	50	1.3	1	1
1250	Female	12	40	1.62	1	1
1251	Female	17	53	1.63	1	1
1252	Male	18	93	1.86	1	1
1253	Male	18	78	1.86	0	1
1254	Male	15	54	1.68	0	1
1255	Male	15	52	1.74	0	1
1256	Female	17	50	1.63	0	1
1257	Male	12	35	1.5	0	1
1258	Male	13	50.6	1.63	0	1
1259	Male	18	74.5	1.9	1	1
1260	Female	18	49	1.62	1	1
1261	Male	15	81	1.92	1	1
1262	Female	18	63	1.75	1	1
1263	Male	18	65	1.82	0	1
1264	Male	16	55	1.72	0	1
1265	Male	14	70	1.7	1	1
1266	Male	17	64	1.83	1	1
1267	Male	16	68	1.75	1	1
1268	Female	18	53	1.6	0	1
1269	Male	16	67	1.75	0	1
1270	Male	18	66	1.88	1	1
1271	Female	14	50	1.6	1	1
1272	Female	15	57	1.72	1	1
1273	Male	19	84	1.88	0	1
1274	Male	18	68	1.8	0	1
1275	Female	19	55	1.64	0	1
1276	Male	19	68	1.88	1	1
1277	Female	17	52	1.63	0	1
1278	Male	14	45	1.65	1	1
1279	Male	15	63	1.7	1	1
1280	Female	12	57	1.6	1	1
1281	Male	16	100	1.75	0	1
1282	Female	17	50	1.75	1	1
1283	Male	18	90	1.76	0	1
1284	Female	19	55	1.66	0	1
1285	Female	17	53	1.7	1	1
1286	Female	12	37	1.6	0	1
1287	Female	15	60	1.71	0	1
1288	Male	15	64	1.7	1	1
1289	Female	14	50	1.65	1	1
1290	Female	18	51	1.65	1	1
1291	Male	16	62	1.72	0	1
1292	Female	18	56	1.73	0	1
1293	Male	17	68	1.77	1	1
1294	Male	17	56	1.7	0	1
1295	Male	19	75	1.81	0	1
1296	Male	18	76	1.72	1	1
1297	Female	18	60	1.71	0	1
1298	Male	14	65	1.7	0	1
1299	Male	18	66	1.76	1	1
1300	Female	18	51	1.66	1	1
1301	Female	19	59	1.75	0	1
1302	Female	18	51	1.65	0	1
1303	Female	15	55	1.65	1	1
1304	Female	18	62	1.77	1	1
1305	Female	14	37	1.54	0	1
1306	Male	10	37	1.49	1	1
1307	Female	18	60	1.69	1	1
1308	Male	12	60	1.67	1	1
1309	Female	15	41	1.55	1	1
1310	Male	14	71	1.8	1	1
1311	Male	19	62	1.9	0	1
1312	Male	17	60	1.75	0	1
1313	Female	14	55	1.6	0	1
1314	Female	19	70	1.69	0	1
1315	Female	19	64.3	1.6	1	1
1316	Male	13	45	1.72	1	1
1317	Male	12	68	1.64	0	1
1318	Female	15	52	1.67	0	1
1319	Male	18	52	1.73	0	1
1320	Female	15	57	1.62	0	1
1321	Female	18	59	1.73	1	1
1322	Male	17	62	1.78	1	1
1323	Female	17	56	1.65	1	1
1324	Female	14	64	1.62	0	1
1325	Female	17	55	1.76	1	1
1326	Male	19	90	1.9	0	1
1327	Female	17	53	1.61	0	1
1328	Female	17	48	1.72	1	1
1329	Female	17	65	1.63	0	1
1330	Female	16	62	1.74	0	1
1331	Male	15	60	1.7	0	1
1332	Male	19	76	1.84	0	1
1333	Male	14	47	1.65	1	1
1334	Female	11	37	1.47	1	1
1335	Female	11	25	1.4	1	1
1336	Male	15	60	1.63	0	1
1337	Female	18	57	1.68	1	1
1338	Female	18	49	1.64	1	1
1339	Male	13	65	1.77	0	1
1340	Male	19	63	1.84	0	1
1341	Female	18	65	1.68	1	1
1342	Male	17	40	1.65	0	1
1343	Male	18	78	1.85	0	1
1344	Male	15	58	1.76	1	1
1345	Female	12	37	1.61	0	1
1346	Male	18	84	1.86	0	1
1347	Male	14	53.2	1.69	1	1
1348	Male	14	41	1.57	1	1
1349	Male	18	63	1.76	0	1
1350	Male	19	77	1.7	0	1
1351	Male	18	60	1.68	0	1
1352	Female	18	50	1.6	1	1
1353	Female	16	46	1.6	0	1
1354	Male	19	65	1.86	0	1
1355	Male	17	67.5	1.87	0	1
1356	Female	13	50	1.6	1	1
1357	Female	14	42	1.76	0	1
1358	Female	17	50	1.65	1	1
1359	Male	15	52	1.73	1	1
1360	Male	18	75	1.76	1	1
1361	Female	17	55	1.68	1	1
1362	Male	14	58	1.6	1	1
1363	Female	18	62.2	1.72	0	1
1364	Female	17	53	1.66	1	1
1365	Male	11	60	1.5	0	1
1366	Male	17	70	1.78	0	1
1367	Male	12	47	1.69	0	1
1368	Male	17	80	1.77	1	1
1369	Female	18	56	1.71	1	1
1370	Female	15	56	1.7	0	1
1371	Female	18	59	1.63	1	1
1372	Male	16	75	1.85	0	1
1373	Female	14	48	1.61	1	1
1374	Male	14	52	1.8	0	1
1375	Male	14	56	1.7	1	1
1376	Female	15	53	1.62	0	1
1377	Male	11	38	1.53	0	1
1378	Male	17	60	1.78	0	1
1379	Female	12	38	1.63	0	1
1380	Female	12	44.3	1.55	1	1
1381	Male	14	40	1.5	1	1
1382	Male	19	95	1.98	1	1
1383	Female	18	80	1.88	1	1
1384	Male	15	57	1.7	1	1
1385	Female	17	57	1.62	1	1
1386	Male	15	55	1.7	0	1
1387	Female	14	50	1.65	0	1
1388	Male	11	34	1.45	1	1
1389	Male	10	37	1.52	0	1
1390	Female	14	55	1.62	1	1
1391	Male	12	44.3	1.55	0	1
1392	Female	17	52	1.65	0	1
1393	Female	14	50	1.68	0	1
1394	Female	19	53	1.64	0	1
1395	Female	19	50	1.58	1	1
1396	Female	17	58	1.65	1	1
1397	Female	16	55	1.74	1	1
1398	Female	17	58	1.69	1	1
1399	Female	17	58	1.66	1	1
1400	Female	14	70	1.78	1	1
1401	Female	17	65	1.7	1	1
1402	Male	13	55	1.73	1	1
1403	Female	15	58	1.7	1	1
1404	Female	15	48	1.65	1	1
1405	Female	14	45	1.63	0	1
1406	Female	16	58	1.64	1	1
1407	Female	18	68	1.73	0	1
1408	Male	15	52	1.55	1	1
1409	Female	17	49	1.76	0	1
1410	Female	12	44.3	1.55	0	1
1411	Female	14	58	1.68	0	1
1412	Male	17	55	1.67	0	1
1413	Male	15	67	1.75	1	1
1414	Male	14	80	1.85	0	1
1415	Male	11	29	1.46	0	1
1416	Female	17	50	1.6	1	1
1417	Female	13	46	1.61	1	1
1418	Female	16	85	1.66	1	1
1419	Male	13	55	1.67	1	1
1420	Female	16	55	1.6	1	1
1421	Female	13	38	1.5	1	1
1422	Female	14	42	1.64	0	1
1423	Female	17	57	1.74	1	1
1424	Male	17	70	1.82	1	1
1425	Male	17	62	1.8	1	1
1426	Female	11	49	1.54	1	1
1427	Female	19	57	1.65	1	1
1428	Female	13	40	1.52	1	1
1429	Female	18	51	1.66	0	1
1430	Female	13	51.5	1.62	1	1
1431	Male	17	60	1.75	1	1
1432	Male	13	45	1.63	1	1
1433	Male	16	80	1.83	0	1
1434	Female	19	49	1.57	0	1
1435	Female	13	48	1.48	1	1
1436	Female	18	54	1.69	1	1
1437	Female	18	50	1.58	1	1
1438	Female	17	53	1.7	1	1
1439	Female	12	42	1.53	1	1
1440	Female	17	65	1.74	1	1
1441	Female	16	51	1.65	1	1
1442	Female	15	57	1.67	1	1
1443	Female	17	56	1.67	1	1
1444	Male	18	72	1.86	1	1
1445	Male	18	57	1.79	1	1
1446	Female	16	42	1.64	1	1
1447	Female	17	50	1.72	1	1
1448	Male	17	64	1.78	1	1
1449	Female	18	62.2	1.72	1	1
1450	Male	17	60	1.83	1	1
1451	Male	14	55	1.65	1	1
1452	Female	18	51	1.59	1	1
1453	Female	18	53	1.65	1	1
1454	Female	14	59	1.6	1	1
1455	Male	17	80	1.75	0	1
1456	Male	18	72	1.8	1	1
1457	Male	16	64	1.81	0	1
1458	Male	19	95	1.87	0	1
1459	Female	19	60	1.68	1	1
1460	Male	17	60	1.75	1	1
1461	Female	17	61	1.69	1	1
1462	Male	17	60	1.72	1	1
1463	Male	16	57	1.71	1	1
1464	Female	19	55	1.71	1	1
1465	Female	17	52	1.65	1	1
1466	Female	17	53	1.68	1	1
1467	Female	18	50	1.63	1	1
1468	Male	14	45	1.58	0	1
1469	Female	17	52	1.62	0	1
1470	Male	14	62	1.72	0	1
1471	Female	16	46	1.67	1	1
1472	Female	18	50	1.65	1	1
1473	Female	18	58	1.66	1	1
1474	Female	18	55	1.65	1	1
1475	Female	17	52	1.69	1	1
1476	Male	18	70	1.73	1	1
1477	Male	18	63	1.83	0	1
1478	Female	14	45	1.62	0	1
1479	Male	18	65	1.7	1	1
1480	Female	17	55	1.67	1	1
1481	Female	15	52	1.7	1	1
1482	Male	18	71	1.85	1	1
1483	Male	15	58	1.74	0	1
1484	Female	13	44.7	1.66	1	1
1485	Female	15	48	1.69	1	1
1486	Female	15	46	1.7	1	1
1487	Male	19	76	1.95	1	1
1488	Male	16	35	1.4	1	1
1489	Female	17	56	1.59	1	1
1490	Female	18	45	1.6	0	1
1491	Female	18	55	1.71	1	1
1492	Male	19	68	1.87	1	1
1493	Female	18	55	1.65	0	1
1494	Male	14	35.5	1.5	1	1
1495	Female	18	53	1.7	0	1
1496	Male	19	95	1.96	0	1
1497	Female	15	36	1.57	0	1
1498	Male	16	71	1.86	1	1
1499	Female	19	52	1.55	1	1
1500	Male	17	70	1.76	0	1
1501	Female	18	68	1.74	1	1
1502	Female	15	52	1.69	1	1
1503	Female	17	62	1.7	1	1
1504	Female	13	40	1.57	1	1
1505	Male	15	48	1.78	1	1
1506	Female	15	40	1.62	0	1
1507	Female	10	39	1.45	0	1
1508	Female	18	60	1.65	1	1
1509	Male	17	54	1.77	0	1
1510	Female	18	62.2	1.72	0	1
1511	Male	10	52	1.48	1	1
1512	Female	17	52	1.64	1	1
1513	Male	18	70	1.84	0	1
1514	Female	19	70	1.7	0	1
1515	Male	15	53	1.72	0	1
1516	Female	18	45	1.55	1	1
1517	Female	17	65	1.68	1	1
1518	Male	14	64	1.72	0	1
1519	Female	11	43	1.6	1	1
1520	Female	14	53.2	1.65	0	1
1521	Female	18	48	1.56	1	1
1522	Female	18	62.2	1.76	0	1
1523	Female	16	48	1.65	0	1
1524	Male	15	89	1.75	1	1
1525	Male	17	77	1.85	1	1
1526	Male	17	82	1.86	0	1
1527	Female	14	49	1.62	1	1
1528	Male	15	55	1.88	1	1
1529	Female	13	55	1.5	1	1
1530	Female	12	69	1.5	1	1
1531	Female	14	48	1.61	1	1
1532	Female	17	50	1.7	0	1
1533	Female	18	45	1.56	1	1
1534	Female	19	55	1.7	0	1
1535	Male	17	92	1.79	1	1
1536	Female	13	46	1.62	0	1
1537	Female	17	47	1.59	1	1
1538	Female	13	37.5	1.6	1	1
1539	Female	17	45	1.6	0	1
1540	Female	16	49	1.73	0	1
1541	Female	17	57	1.68	0	1
1542	Male	15	62	1.72	1	1
1543	Male	17	57	1.67	1	1
1544	Female	13	40	1.4	0	1
1545	Female	18	53	1.69	1	1
1546	Female	13	50	1.69	1	1
1547	Male	19	72	1.85	1	1
1548	Female	17	52	1.72	0	1
1549	Male	15	64	1.76	1	1
1550	Male	18	80	1.94	1	1
1551	Male	15	47	1.65	0	1
1552	Male	13	50	1.59	1	1
1553	Female	16	58	1.63	0	1
1554	Female	14	42	1.66	1	1
1555	Male	18	70	1.76	1	1
1556	Male	12	44.3	1.55	1	1
1557	Female	17	68	1.67	1	1
1558	Female	18	86	1.71	0	1
1559	Female	18	48	1.56	0	1
1560	Female	15	55	1.65	1	1
1561	Female	13	56	1.59	1	1
1562	Male	14	50	1.62	1	1
1563	Female	12	35	1.5	1	1
1564	Male	14	70	1.82	0	1
1565	Female	19	58	1.64	1	1
1566	Male	14	44	1.63	1	1
1567	Female	16	52	1.59	0	1
1568	Female	17	52	1.61	0	1
1569	Female	18	59	1.7	1	1
1570	Female	11	31	1.38	0	1
1571	Female	14	45	1.6	1	1
1572	Female	19	58	1.72	0	1
1573	Female	18	60	1.64	1	1
1574	Female	17	56	1.76	0	1
1575	Male	12	61	1.65	1	1
1576	Male	11	40	1.49	0	1
1577	Female	17	49	1.64	0	1
1578	Male	15	70	1.74	0	1
1579	Female	18	55	1.65	0	1
1580	Male	15	67	1.65	0	1
1581	Female	18	52	1.67	1	1
1582	Male	13	71	1.55	0	1
1583	Male	14	40	1.55	1	1
1584	Male	15	65	1.75	1	1
1585	Male	16	82	1.87	0	1
1586	Male	14	53.2	1.65	0	1
1587	Female	15	52	1.58	0	1
1588	Male	13	50.6	1.63	1	1
1589	Female	14	53.5	1.5	1	1
1590	Male	17	65	1.84	0	1
1591	Male	11	46	1.51	1	1
1592	Male	18	67	1.76	0	1
1593	Female	14	57	1.67	0	1
1594	Male	18	87	1.88	0	1
1595	Male	15	58	1.8	1	1
1596	Male	19	82.6	1.73	1	1
1597	Male	18	60	1.8	0	1
1598	Male	15	50	1.67	0	1
1599	Male	16	73	1.77	0	1
1600	Male	17	70	1.83	1	1
1601	Male	18	63	1.79	1	1
1602	Female	14	41	1.63	0	1
1603	Female	14	43	1.69	1	1
1604	Female	17	59	1.72	1	1
1605	Male	17	72	1.82	0	1
1606	Male	17	75	1.9	0	1
1607	Male	17	61	1.75	0	1
1608	Male	13	33	1.5	1	1
1609	Female	17	56	1.61	1	1
1610	Male	15	60	1.42	0	1
1611	Female	17	46	1.57	1	1
1612	Male	17	75	1.89	0	1
1613	Male	16	68	1.78	1	1
1614	Male	17	77	1.83	0	1
1615	Male	18	62	1.7	1	1
1616	Male	16	67	1.84	0	1
1617	Female	16	57	1.68	1	1
1618	Female	17	47	1.63	0	1
1619	Female	14	57	1.71	1	1
1620	Female	15	52	1.72	1	1
1621	Female	18	52	1.64	1	1
1622	Female	17	63	1.73	0	1
1623	Female	17	69	1.78	1	1
1624	Female	18	74	1.79	1	1
1625	Female	16	62	1.64	0	1
1626	Female	19	65	1.7	0	1
1627	Male	19	80	1.71	1	1
1628	Female	17	60	1.7	1	1
1629	Female	17	55	1.63	0	1
1630	Female	17	50	1.74	0	1
1631	Female	18	61	1.71	1	1
1632	Female	17	59	1.65	1	1
1633	Female	17	59	1.69	1	1
1634	Female	14	37	1.5	1	1
1635	Male	14	62	1.81	1	1
1636	Male	15	52	1.72	1	1
1637	Male	14	50	1.54	0	1
1638	Female	17	48	1.75	1	1
1639	Female	17	68	1.78	1	1
1640	Female	17	61	1.63	0	1
1641	Male	14	60	1.6	0	1
1642	Male	15	58	1.73	0	1
1643	Female	17	65	1.71	0	1
1644	Female	14	60	1.72	0	1
1645	Male	19	70	1.75	0	1
1646	Male	19	90	1.9	1	1
1647	Female	14	64	1.68	1	1
1648	Male	19	70	1.82	1	1
1649	Male	19	84	1.95	0	1
1650	Male	17	78	1.88	0	1
1651	Male	18	61	1.81	1	1
1652	Female	18	58	1.7	1	1
1653	Female	19	49	1.68	0	1
1654	Male	16	70	1.77	0	1
1655	Male	17	65	1.78	1	1
1656	Female	10	38	1.44	1	1
1657	Female	13	55	1.6	1	1
1658	Female	15	49	1.71	1	1
1659	Female	19	60	1.73	1	1
1660	Male	15	67	1.72	1	1
1661	Female	14	51	1.6	0	1
1662	Male	17	77	1.82	0	1
1663	Female	17	60	1.75	1	1
1664	Male	14	40	1.55	0	1
1665	Male	17	77	1.82	1	1
1666	Male	18	65	1.75	1	1
1667	Male	14	62.4	1.66	0	1
1668	Male	18	62.2	1.72	0	1
1669	Male	14	55	1.57	1	1
1670	Female	17	50	1.63	1	1
1671	Male	17	60	1.7	0	1
1672	Male	13	60	1.71	0	1
1673	Male	16	60	1.75	0	1
1674	Male	18	52	1.72	0	1
1675	Male	14	85	1.8	0	1
1676	Male	14	70	1.8	0	1
1677	Male	19	65	1.75	1	1
1678	Female	16	58	1.69	1	1
1679	Female	17	60	1.71	1	1
1680	Male	14	53.2	1.65	1	1
1681	Male	17	47.5	1.59	1	1
1682	Female	17	60	1.65	1	1
1683	Male	19	65	1.66	1	1
1684	Female	15	52	1.68	1	1
1685	Male	16	60	1.73	0	1
1686	Female	13	50	1.6	0	1
1687	Male	17	71	1.83	0	1
1688	Male	14	52	1.68	0	1
1689	Male	12	45	1.6	0	1
1690	Male	18	82	1.86	1	1
1691	Female	17	50	1.64	1	1
1692	Male	17	86	1.9	0	1
1693	Female	19	56	1.61	1	1
1694	Male	19	72	1.72	0	1
1695	Female	17	57	1.72	0	1
1696	Male	18	69	1.85	1	1
1697	Male	18	70	1.83	0	1
1698	Female	18	54	1.65	0	1
1699	Female	18	50	1.65	1	1
1700	Male	18	69	1.8	1	1
1701	Female	18	53	1.72	0	1
1702	Female	17	51	1.6	1	1
1703	Female	17	45	1.67	1	1
1704	Male	17	69	1.75	1	1
1705	Male	14	36	1.6	0	1
1706	Male	15	89	1.83	0	1
1707	Male	14	42	1.55	0	1
1708	Female	17	58	1.65	1	1
1709	Male	15	63	1.74	0	1
1710	Male	14	65	1.82	0	1
1711	Male	18	81	1.8	0	1
1712	Male	14	45	1.57	0	1
1713	Male	17	62	1.77	0	1
1714	Male	16	80	1.8	1	1
1715	Female	14	60	1.6	0	1
1716	Male	19	77	1.8	0	1
1717	Male	14	62	1.7	1	1
1718	Female	16	49	1.64	1	1
1719	Male	17	73	1.82	1	1
1720	Female	18	53	1.63	1	1
1721	Male	18	57	1.79	0	1
1722	Female	12	38	1.6	1	1
1723	Male	14	46	1.6	0	1
1724	Male	18	63	1.73	0	1
1725	Male	17	67.5	1.79	1	1
1726	Male	19	80	1.81	0	1
1727	Female	17	50	1.63	0	1
1728	Female	17	61.5	1.61	1	1
1729	Female	19	67	1.65	0	1
1730	Female	17	65	1.7	1	1
1731	Female	13	46	1.66	1	1
1732	Female	17	48	1.62	1	1
1733	Male	14	70	1.7	0	1
1734	Male	14	53	1.79	1	1
1735	Female	19	56	1.62	1	1
1736	Female	17	51	1.67	1	1
1737	Male	16	70	1.8	0	1
1738	Female	17	52	1.7	1	1
1739	Female	11	36	1.45	0	1
1740	Female	14	46	1.64	0	1
1741	Male	14	60	1.78	1	1
1742	Female	17	55	1.64	1	1
1743	Male	14	50	1.63	1	1
1744	Male	14	48	1.67	0	1
1745	Male	19	72	1.8	0	1
1746	Male	18	82	1.82	1	1
1747	Female	14	45	1.58	0	1
1748	Female	17	69	1.79	1	1
1749	Male	17	75	1.94	0	1
1750	Female	19	68	1.72	1	1
1751	Male	18	80	1.85	0	1
1752	Male	16	66	1.78	0	1
1753	Male	19	70	1.85	0	1
1754	Female	10	45	1.5	1	1
1755	Male	19	80	1.86	0	1
1756	Female	17	49	1.62	0	1
1757	Male	11	56	1.6	0	1
1758	Male	18	62	1.8	0	1
1759	Male	17	67	1.8	0	1
1760	Male	14	50	1.68	1	1
1761	Female	18	60	1.73	0	1
1762	Female	14	53.2	1.65	0	1
1763	Female	14	43	1.56	0	1
1764	Female	17	50	1.65	1	1
1765	Female	17	52	1.69	0	1
1766	Male	16	60	1.73	1	1
1767	Female	14	50	1.65	0	1
1768	Female	14	45	1.62	0	1
1769	Male	16	50	1.62	0	1
1770	Female	13	56	1.7	0	1
1771	Female	19	54	1.69	1	1
1772	Female	16	58	1.63	1	1
1773	Female	19	57	1.76	0	1
1774	Male	18	61	1.74	0	1
1775	Female	15	51	1.66	1	1
1776	Male	15	45	1.7	1	1
1777	Male	17	60	1.67	1	1
1778	Male	17	75	1.87	1	1
1779	Female	12	40	1.61	0	1
1780	Male	17	73	1.76	0	1
1781	Female	14	50	1.7	0	1
1782	Male	17	73	1.8	0	1
1783	Male	17	78	1.91	1	1
1784	Female	18	46	1.6	0	1
1785	Female	15	56	1.65	0	1
1786	Male	17	70	1.81	1	1
1787	Male	18	80	1.85	1	1
1788	Female	14	50	1.61	0	1
1789	Female	14	55	1.67	1	1
1790	Male	14	62.9	1.79	1	1
1791	Female	12	24	1.37	1	1
1792	Female	12	23	1.4	1	1
1793	Male	18	60	1.76	0	1
1794	Female	10	30	1.42	0	1
1795	Male	18	80	1.78	1	1
1796	Male	19	95	1.88	1	1
1797	Male	14	49.5	1.63	0	1
1798	Male	17	78	1.88	0	1
1799	Male	19	65	1.85	0	1
1800	Female	18	55	1.64	0	1
1801	Female	19	65	1.69	0	1
1802	Female	19	56	1.68	1	1
1803	Male	18	65	1.73	0	1
1804	Male	12	95	1.72	1	1
1805	Male	14	44	1.59	1	1
1806	Female	17	54	1.63	0	1
1807	Male	17	65	1.72	0	1
1808	Male	17	80	1.81	0	1
1809	Male	15	65	1.9	1	1
1810	Male	18	55	1.67	1	1
1811	Male	18	65	1.65	0	1
1812	Male	18	97.5	1.92	0	1
1813	Male	17	74	1.76	0	1
1814	Male	18	65	1.76	0	1
1815	Female	19	52	1.59	0	1
1816	Male	19	74	1.82	1	1
1817	Female	17	54	1.67	1	1
1818	Male	17	60	1.7	1	1
1819	Male	16	60	1.8	0	1
1820	Male	19	70	1.86	1	1
1821	Female	13	47	1.58	0	1
1822	Male	19	82	1.79	1	1
1823	Female	16	67	1.71	0	1
1824	Female	19	56	1.68	0	1
1825	Male	14	55	1.66	1	1
1826	Female	16	50	1.68	1	1
1827	Female	19	50	1.6	1	1
1828	Female	13	65	1.7	0	1
1829	Female	17	51	1.68	1	1
1830	Female	15	42	1.54	1	1
1831	Male	17	78	1.84	1	1
1832	Male	16	83	1.8	0	1
1833	Female	18	55	1.72	1	1
1834	Female	15	48	1.9	1	1
1835	Female	14	43	1.6	1	1
1836	Female	16	50	1.65	1	1
1837	Male	10	39	1.45	1	1
1838	Male	12	51	1.64	1	1
1839	Female	12	46	1.62	1	1
1840	Male	15	55	1.68	1	1
1841	Male	17	59	1.69	1	1
1842	Male	18	65	1.76	1	1
1843	Female	14	50	1.6	1	1
1844	Male	19	71	1.81	1	1
1845	Female	14	40	1.59	1	1
1846	Female	14	52	1.57	1	1
1847	Male	14	36	1.3	1	1
1848	Male	11	50	1.6	0	1
1849	Male	14	47	1.62	0	1
1850	Female	14	80	1.6	0	1
1851	Male	14	43	1.51	0	1
1852	Male	16	72	1.86	0	1
1853	Female	16	65	1.68	1	1
1854	Male	14	46	1.52	0	1
1855	Female	13	80	1.7	0	1
1856	Male	17	75	1.86	1	1
1857	Female	17	60	1.77	0	1
1858	Male	14	60	1.62	1	1
1859	Male	18	68	1.77	0	1
1860	Female	13	50	1.67	1	1
1861	Female	14	60	1.68	0	1
1862	Female	14	63	1.68	0	1
1863	Male	18	85	1.9	1	1
1864	Female	12	40	1.5	0	1
1865	Female	12	32	1.46	0	1
1866	Male	11	38	1.56	0	1
1867	Male	16	70	1.75	0	1
1868	Male	17	75	1.85	1	1
1869	Male	17	55	1.7	1	1
1870	Male	18	72	1.82	1	1
1871	Male	17	80	1.86	1	1
1872	Male	18	70	1.85	0	1
1873	Female	13	37	1.56	0	1
1874	Male	11	70	1.5	0	1
1875	Male	18	71	1.8	0	1
1876	Male	18	70	1.78	0	1
1877	Male	17	60	1.73	0	1
1878	Male	19	90	1.75	1	1
1879	Male	15	62	1.8	0	1
1880	Female	17	60	1.7	0	1
1881	Male	13	53	1.65	0	1
1882	Male	13	40	1.56	0	1
1883	Male	16	58	1.75	0	1
1884	Male	17	64	1.79	0	1
1885	Male	18	71	1.84	1	1
1886	Female	14	60	1.6	0	1
1887	Female	16	50	1.64	1	1
1888	Male	13	56	1.72	0	1
1889	Female	14	63	1.67	0	1
1890	Male	14	70	1.71	1	1
1891	Male	17	69	1.75	1	1
1892	Male	17	65	1.76	1	1
1893	Male	13	52	1.73	1	1
1894	Male	11	48	1.5	0	1
1895	Male	12	48.5	1.54	0	1
1896	Female	14	40	1.45	1	1
1897	Female	10	32	1.4	0	1
1898	Female	15	55	1.63	0	1
1899	Female	17	60	1.7	1	1
1900	Male	17	65	1.75	1	1
1901	Male	17	60	1.72	0	1
1902	Male	18	80	1.85	1	1
1903	Male	15	63	1.78	0	1
1904	Male	17	70	1.86	1	1
1905	Female	18	48	1.6	0	1
1906	Male	17	62	1.74	1	1
1907	Male	14	53	1.6	1	1
1908	Male	16	60	1.82	0	1
1909	Male	15	60	1.76	0	1
1910	Male	14	73	1.75	0	1
1911	Male	17	70	1.83	1	1
1912	Female	13	66	1.7	0	1
1913	Male	12	34	1.43	0	1
1914	Male	15	70	1.75	0	1
1915	Female	17	55	1.61	0	1
1916	Male	14	50	1.65	0	1
1917	Female	12	48	1.54	1	1
1918	Female	14	48	1.5	1	1
1919	Female	15	58.4	1.67	0	1
1920	Male	16	50	1.67	1	1
1921	Female	17	60	1.74	0	1
1922	Male	17	75	1.85	0	1
1923	Female	19	52	1.69	0	1
1924	Female	14	57	1.58	0	1
1925	Female	11	37	1.42	0	1
1926	Female	12	45	1.57	0	1
1927	Male	16	61	1.64	0	1
1928	Female	14	56	1.54	0	1
1929	Female	18	56	1.65	1	1
1930	Female	18	52	1.69	1	1
1931	Female	17	45	1.55	1	1
1932	Male	14	48	1.7	1	1
1933	Male	13	40	1.45	0	1
1934	Male	14	48	1.63	1	1
1935	Male	19	70	1.84	0	1
1936	Male	18	62	1.75	0	1
1937	Female	14	54	1.49	0	1
1938	Female	17	60	1.72	1	1
1939	Female	13	38	1.46	0	1
1940	Female	13	48	1.65	0	1
1941	Female	13	37	1.57	1	1
1942	Female	19	70	1.74	1	1
1943	Male	14	65	1.74	0	1
1944	Male	11	39.4	1.6	1	1
1945	Male	18	81	1.82	1	1
1946	Male	15	54	1.69	0	1
1947	Male	16	55	1.62	0	1
1948	Male	14	40	1.55	0	1
1949	Male	11	34	1.5	0	1
1950	Male	15	54	1.71	1	1
1951	Male	14	48	1.7	1	1
1952	Male	17	70	1.76	1	1
1953	Male	14	68	1.75	1	1
1954	Female	12	42	1.49	0	1
1955	Male	16	78	1.8	1	1
1956	Male	11	37	1.47	1	1
1957	Female	14	58	1.78	1	1
1958	Male	14	65	1.73	0	1
1959	Male	15	75	1.8	0	1
1960	Male	13	48	1.63	0	1
1961	Female	19	52	1.68	1	1
1962	Male	16	65	1.75	0	1
1963	Male	11	34	1.45	1	1
1964	Male	16	55	1.7	1	1
1965	Male	17	62	1.74	0	1
1966	Male	19	65	1.78	0	1
1967	Female	17	50	1.59	0	1
1968	Female	15	47	1.58	1	1
1969	Female	12	30	1.4	0	1
1970	Male	13	45	1.62	0	1
1971	Female	12	35	1.53	1	1
1972	Male	15	59.5	1.74	0	1
1973	Female	16	60	1.7	1	1
1974	Female	17	50	1.68	0	1
1975	Male	15	55	1.65	1	1
1976	Female	14	65	1.6	0	1
1977	Female	12	45	1.55	1	1
1978	Male	19	60	1.8	0	1
1979	Male	14	35	1.49	0	1
1980	Male	17	70	1.83	1	1
1981	Female	18	57	1.67	0	1
1982	Female	14	58	1.6	0	1
1983	Male	16	70	1.94	1	1
1984	Male	17	77	1.8	0	1
1985	Female	17	42	1.6	1	1
1986	Male	17	67	1.91	1	1
1987	Male	14	46	1.63	0	1
1988	Male	17	65	1.8	0	1
1989	Male	15	79	1.74	1	1
1990	Male	17	70	1.91	1	1
1991	Male	17	61.5	1.83	1	1
1992	Male	14	63	1.78	0	1
1993	Female	14	70	1.76	0	1
1994	Male	19	71	1.85	0	1
1995	Female	18	60	1.56	1	1
1996	Male	14	45	1.65	1	1
1997	Female	18	49	1.64	1	1
1998	Male	14	60	1.8	0	1
[truncated: 9,425 more rows]

## Sheet: LBP
RespondentID	Gender	Age	NLBP frequency	Circumstances in with NLBP occured - Lifting heavy objects	Circumstances in with NLBP occured - Carrying a school backpack	Circumstances in with NLBP occured - Physical exercises	Circumstances in with NLBP occured - PE lesson	Circumstances in with NLBP occured - Sitting	Circumstances in with NLBP occured - Mental stres	Circumstances in with NLBP occured - Changeable weather	Circumstances in with NLBP occured - Other	Seeking doctor`s help	Ways of coping with NLBP - Medicines prescribed by a doctor	Ways of coping with NLBP - Generally available painkillers	Ways of coping with NLBP - Electrotherapy procedures	Ways of coping with NLBP - Physiotherapeutic treatment other than electrotherapy	Ways of coping with NLBP - Rest	Ways of coping with NLBP - Other	Reduce NLBP - I don`t know	Reduce NLBP - Increased physical activity	Reduce NLBP - Limiting the weight of a school backpack	Reduce NLBP - Reducing the number of hours spent in a sedentary position	Reduce NLBP - Adapting school equipment	Reduce NLBP - Increased the avaiability of painkillers	Reduce NLBP - Other
			1=very rare LBP; 2=LBP a few times a year; 3=frequent of constant LBP	0=no; 1=yes	0=no; 1=yes	0=no; 1=yes	0=no; 1=yes	0=no; 1=yes	0=no; 1=yes	0=no; 1=yes	0=no; 1=yes	0=no; 1=yes	0=no; 1=yes	0=no; 1=yes	0=no; 1=yes	0=no; 1=yes	0=no; 1=yes	0=no; 1=yes	0=no; 1=yes	0=no; 1=yes	0=no; 1=yes	0=no; 1=yes	0=no; 1=yes	0=no; 1=yes	0=no; 1=yes
1	Female	16	1	1	0	0	0	0	0	1	1	0	0	0	0	0	0	0	0	0	1	1	1	0	0
2	Female	18	1	1	0	0	0	0	0	0	1	0	0	0	0	0	0	1	0	1	1	0	0	0	0
3	Female	17	1	0	0	0	0	0	0	0	1	0	0	0	0	0	0	1	0	1	0	0	0	0	0
4	Male	14	1	0	0	0	0	0	0	0	1	0	0	0	0	0	0	0	0	0	1	0	0	0	0
5	Female	17	1	0	0	0	0	0	0	0	1	0	0	0	0	0	0	0	0	0	1	0	0	0	0
6	Female	17	1	0	0	0	0	0	0	0	1	0	0	0	1	1	1	0	0	1	1	0	0	0	0
7	Female	17	1	1	0	0	0	0	0	0	1	0	0	1	0	1	1	0	0	1	1	1	0	0	0
8	Female	19	1	0	0	0	0	0	0	0	1	0	0	1	0	0	1	0	0	1	0	1	1	0	0
9	Female	17	1	0	0	0	0	0	0	0	1	0	0	1	0	0	1	0	0	0	0	1	1	0	0
10	Female	18	1	0	0	0	0	0	0	0	1	0	0	1	0	0	1	0	0	1	0	0	0	0	0
11	Female	16	1	1	0	0	0	1	1	0	1	0	0	1	0	0	1	0	1	0	0	0	0	0	0
12	Female	19	1	1	0	0	0	0	0	0	1	0	0	0	0	0	1	0	0	1	0	0	0	0	0
13	Female	19	1	0	0	0	0	1	0	0	1	0	0	0	0	0	1	0	0	1	0	1	0	0	0
14	Female	15	1	1	0	0	0	0	0	0	1	0	0	0	0	0	1	0	0	1	1	1	0	0	0
15	Female	15	1	1	0	0	0	0	0	0	1	0	0	0	0	0	1	0	0	1	1	1	0	0	0
16	Female	17	1	1	0	0	0	0	0	0	1	0	0	0	0	0	1	0	0	1	0	0	0	0	0
17	Female	17	1	1	1	0	0	0	0	0	1	0	0	0	0	1	0	0	0	1	1	0	0	0	0
18	Female	18	1	1	0	0	0	1	0	0	1	0	0	1	0	0	0	0	0	0	1	1	0	0	0
19	Female	17	1	1	0	0	0	0	0	0	1	0	0	1	0	0	0	0	0	0	1	1	0	0	0
20	Female	17	1	1	1	1	0	0	0	0	1	0	0	0	0	0	1	0	0	0	1	0	0	0	0
21	Female	18	1	1	0	0	0	1	0	0	1	0	0	1	0	0	1	1	0	1	1	1	1	0	0
22	Female	19	1	0	0	0	0	0	0	0	1	0	0	1	0	0	0	0	0	0	0	0	1	0	0
23	Female	18	1	0	0	0	0	0	0	0	1	0	0	0	0	1	1	0	0	0	1	1	1	0	0
24	Female	15	1	0	0	0	0	0	0	0	1	0	0	1	0	0	1	0	0	0	0	0	0	0	0
25	Female	18	1	0	1	0	0	0	0	0	1	0	0	0	0	0	1	0	0	0	0	0	0	0	0
26	Female	16	1	0	0	0	0	0	0	0	1	0	0	0	1	1	0	0	0	1	0	0	1	0	0
27	Female	19	1	0	0	0	0	0	0	1	1	1	0	1	0	0	0	0	0	1	1	1	0	0	0
28	Female	15	1	1	0	0	0	1	1	0	1	0	0	1	0	0	0	1	0	1	1	1	1	0	0
29	Male	18	1	0	0	0	0	0	0	0	1	0	0	0	0	0	0	0	1	0	0	0	0	0	0
30	Female	17	1	0	0	0	0	0	0	0	1	0	0	0	0	0	0	0	0	1	1	1	1	0	0
31	Female	17	1	0	0	0	0	0	0	0	1	0	0	0	0	0	0	0	0	1	1	1	0	0	0
32	Female	18	1	0	1	0	0	0	0	0	1	0	0	0	0	0	0	0	0	1	1	0	0	0	0
33	Female	14	1	0	0	0	0	0	0	0	1	0	0	0	0	0	0	0	0	0	0	1	0	0	0
34	Female	14	1	0	0	0	0	0	0	0	1	0	0	0	0	0	0	0	1	0	0	0	0	0	0
35	Female	14	1	1	1	0	0	1	0	0	1	1	0	0	1	1	1	0	0	1	1	1	0	0	0
36	Female	18	1	0	0	0	0	1	0	0	1	0	0	1	0	1	1	0	0	1	1	0	0	0	0
37	Female	17	1	0	0	0	0	0	0	0	1	0	0	0	0	1	1	0	0	0	1	1	0	0	0
38	Female	16	1	0	0	0	0	0	0	0	1	0	0	0	0	1	1	0	0	0	0	0	1	0	0
39	Female	17	1	0	0	0	0	0	0	0	1	0	0	0	0	1	1	0	0	1	1	1	0	0	0
40	Female	15	1	0	0	0	0	1	1	0	1	0	0	0	0	1	1	0	0	1	1	1	0	0	0
41	Female	19	1	0	0	0	0	1	0	0	1	0	0	0	0	1	1	0	0	1	1	1	0	0	0
42	Female	15	1	0	0	0	0	0	0	0	1	0	0	0	0	1	1	0	0	1	1	0	0	0	0
43	Female	14	1	0	0	0	0	1	0	0	1	0	0	0	0	1	1	0	0	0	1	0	0	0	0
44	Female	17	1	0	1	0	0	0	0	0	1	0	0	0	0	1	1	0	0	0	1	0	0	0	0
45	Female	19	1	0	0	0	0	1	0	0	1	0	0	0	0	1	1	0	0	1	0	1	0	0	0
46	Female	17	1	0	0	0	0	0	0	0	1	0	0	0	0	1	1	0	0	1	0	1	0	0	0
47	Female	14	1	0	1	0	0	0	0	0	1	0	0	0	0	1	1	0	0	1	0	0	0	0	0
48	Female	17	1	0	0	0	0	0	0	0	1	0	0	0	0	1	1	0	0	1	0	0	0	0	0
49	Female	15	1	0	0	0	0	0	0	0	1	0	0	0	0	1	1	0	0	1	1	1	0	0	0
50	Female	16	1	0	0	0	0	0	0	0	1	0	0	0	1	0	1	0	0	1	1	0	1	0	0
51	Female	17	1	0	0	0	0	0	0	0	1	0	0	0	1	0	1	0	0	1	0	0	1	0	0
52	Female	14	1	0	0	0	0	0	0	0	1	0	0	1	0	0	1	0	0	1	1	1	0	0	0
53	Female	18	1	1	0	0	0	0	0	0	1	0	0	1	0	0	1	0	0	1	1	0	0	0	0
54	Female	17	1	0	0	1	0	0	0	0	1	0	0	1	0	0	1	0	0	0	1	0	0	0	0
55	Female	16	1	0	0	0	0	0	0	0	1	0	0	1	0	0	1	0	0	0	1	0	0	0	0
56	Female	13	1	0	0	0	0	0	1	0	1	0	0	1	0	0	1	0	0	0	0	1	0	0	0
57	Female	16	1	0	0	0	0	0	0	0	1	0	0	1	0	0	1	0	0	0	0	0	0	0	0
58	Female	14	1	0	0	0	0	0	0	0	1	1	0	0	0	0	1	0	0	1	0	0	0	0	0
59	Female	15	1	0	0	0	0	1	0	0	1	0	0	0	0	0	1	0	0	1	0	0	1	0	0
60	Female	14	1	0	0	0	0	1	0	0	1	0	0	0	0	0	1	0	0	1	0	1	0	0	0
61	Female	17	1	1	0	0	0	0	0	0	1	0	0	0	0	0	1	0	0	0	1	1	1	0	0
62	Female	12	1	0	0	0	0	0	0	0	1	0	0	0	0	0	1	0	0	1	1	0	1	0	0
63	Female	19	1	0	0	0	0	0	0	0	1	0	0	0	0	0	1	0	0	0	1	0	1	0	0
64	Female	14	1	0	0	0	0	0	0	0	1	0	0	0	0	0	1	0	0	0	1	0	1	0	0
65	Female	17	1	0	0	0	0	0	0	0	1	0	0	0	0	0	1	0	0	1	0	0	1	0	0
66	Female	15	1	0	0	0	0	0	0	0	1	0	0	0	0	0	1	0	0	1	1	1	0	0	0
67	Female	15	1	0	0	0	0	0	0	0	1	0	0	0	0	0	1	0	0	1	1	1	0	0	0
68	Female	14	1	0	1	0	0	0	0	0	1	0	0	0	0	0	1	0	0	0	1	1	0	0	0
69	Female	17	1	0	0	0	0	0	0	0	1	0	0	0	0	0	1	0	0	0	1	1	0	0	0
70	Female	13	1	0	0	0	0	0	0	0	1	0	0	0	0	0	1	0	0	0	1	1	0	0	0
71	Female	19	1	0	0	0	0	0	0	0	1	0	0	0	0	0	1	0	0	1	1	0	0	0	0
72	Female	18	1	0	0	0	0	0	0	0	1	0	0	0	0	0	1	0	0	1	1	0	0	0	0
73	Female	18	1	0	0	1	0	0	0	0	1	0	0	0	0	1	1	0	0	1	1	0	0	0	0
74	Female	17	1	1	1	0	0	0	0	0	1	0	0	0	0	0	1	0	0	0	1	0	0	0	0
75	Female	14	1	0	0	0	0	0	0	0	1	0	0	0	0	0	1	0	0	0	1	0	0	0	0
76	Female	13	1	0	0	0	0	0	0	0	1	0	0	0	0	0	1	0	0	0	1	0	0	0	0
77	Male	17	1	1	1	0	0	0	0	0	1	0	0	0	0	0	1	0	0	0	1	0	0	0	0
78	Female	14	1	0	1	0	0	0	0	0	1	0	0	0	0	0	1	0	0	0	0	1	0	0	0
79	Female	19	1	0	0	0	0	0	0	0	1	0	0	0	0	0	1	0	0	0	0	1	0	0	0
80	Female	19	1	0	0	0	0	0	0	0	1	0	0	0	0	0	1	0	0	0	0	1	0	0	0
81	Female	18	1	0	0	0	0	0	0	0	1	0	0	0	0	0	1	0	0	1	0	0	0	0	0
82	Female	19	1	0	0	0	0	0	0	0	1	0	0	0	0	0	1	0	0	1	0	0	0	0	0
83	Female	18	1	0	0	0	0	1	0	0	1	0	0	0	0	0	1	0	0	1	0	0	0	0	0
84	Female	17	1	0	0	0	0	0	0	0	1	0	0	0	0	0	1	0	0	1	0	0	0	0	0
85	Female	17	1	0	0	0	0	0	0	0	1	0	0	0	0	0	1	0	1	0	0	0	0	0	0
86	Female	18	1	0	0	0	0	0	0	0	1	0	0	0	0	0	1	0	1	0	0	0	0	0	0
87	Female	17	1	0	0	0	0	0	0	0	1	0	0	0	0	0	1	0	0	1	1	1	1	0	0
88	Female	15	1	0	0	0	0	0	0	0	1	0	0	0	1	1	0	0	0	1	0	0	0	0	0
89	Female	15	1	0	1	0	0	0	0	0	1	0	0	1	0	1	0	0	0	1	1	1	0	0	0
90	Female	17	1	0	0	0	0	0	0	0	1	0	0	0	0	1	0	0	0	1	1	1	1	0	0
91	Female	19	1	0	0	0	0	1	0	0	1	0	0	0	0	1	0	0	0	1	1	1	0	0	0
92	Female	14	1	0	0	0	0	0	0	0	1	0	0	0	0	1	0	0	0	0	1	0	0	0	0
93	Female	17	1	0	0	0	0	0	0	0	1	0	0	0	0	1	0	0	0	0	0	1	0	0	0
94	Female	17	1	0	0	0	0	0	0	0	1	0	0	0	0	1	0	0	1	0	0	0	0	0	0
95	Female	17	1	1	1	0	0	0	0	0	1	1	0	0	0	1	0	0	0	0	1	1	0	0	0
96	Female	14	1	0	0	0	0	0	0	0	1	0	0	0	1	0	0	0	0	0	1	0	0	0	0
97	Female	11	1	0	0	0	0	0	0	0	1	0	0	0	1	0	0	0	0	0	1	0	0	0	0
98	Female	16	1	1	0	0	0	0	0	0	1	0	0	1	0	0	0	0	0	0	0	0	0	1	0
99	Male	18	1	0	0	0	0	0	0	0	1	0	0	1	0	0	0	0	0	1	1	1	1	0	0
100	Female	18	1	0	0	0	0	0	0	0	1	0	0	1	0	0	0	0	0	1	1	1	1	0	0
101	Female	16	1	0	0	0	0	0	0	0	1	0	0	1	0	0	0	0	0	0	0	0	1	0	0
102	Female	13	1	1	0	0	0	0	0	0	1	0	0	1	0	1	0	0	0	1	1	1	0	0	0
103	Female	17	1	0	0	0	0	1	0	0	1	0	0	1	0	0	0	0	0	0	1	1	0	0	0
104	Female	14	1	0	1	0	0	0	0	0	1	0	0	1	0	0	0	0	0	1	1	0	0	0	0
105	Female	16	1	0	0	0	0	0	0	0	1	0	0	1	0	0	0	0	0	0	1	0	0	0	0
106	Female	17	1	0	0	0	0	0	0	0	1	0	0	1	0	0	0	0	0	0	1	0	0	0	0
107	Female	14	1	0	0	0	0	0	0	0	1	0	0	1	0	0	0	0	0	0	0	1	0	0	0
108	Female	14	1	0	0	0	0	0	0	0	1	0	1	0	0	0	0	0	0	0	1	1	1	0	0
109	Female	15	1	0	1	0	0	0	0	1	0	0	0	0	0	0	0	0	0	1	1	0	0	0	0
110	Male	15	1	1	1	0	0	0	0	0	0	0	0	0	0	0	0	0	0	1	1	0	0	0	0
111	Male	18	1	1	0	0	0	1	0	0	0	0	0	0	0	1	1	0	0	1	1	0	1	0	0
112	Female	14	1	0	0	0	1	1	0	0	1	0	0	0	1	0	1	0	0	1	0	1	1	0	0
113	Female	14	1	1	0	0	1	0	0	0	0	0	0	0	0	0	1	0	0	0	1	0	0	0	0
114	Female	19	1	0	0	0	0	1	0	1	1	0	0	1	1	1	1	0	0	0	1	0	1	0	0
115	Female	14	1	0	0	0	0	1	0	0	1	0	0	0	0	1	1	0	0	1	1	1	0	0	0
116	Female	18	1	0	0	0	0	1	0	0	1	1	0	0	0	1	0	0	0	1	1	1	0	0	0
117	Female	19	1	1	1	0	0	1	0	1	1	1	0	0	1	1	0	0	0	1	0	0	1	0	1
118	Female	13	1	1	0	0	0	1	0	0	1	0	0	0	0	1	1	1	0	0	1	0	0	0	0
119	Female	18	1	0	0	0	0	0	0	0	1	0	0	0	0	0	0	0	0	0	0	1	0	0	0
120	Female	18	1	0	0	0	0	1	0	0	1	0	0	0	0	1	1	0	0	0	1	1	1	0	0
121	Female	15	1	1	1	0	0	0	0	0	1	0	0	0	0	1	1	0	0	0	1	0	0	0	0
122	Female	17	1	1	0	0	0	0	0	0	1	0	0	1	1	0	1	0	0	1	1	1	1	0	0
123	Female	17	1	1	0	0	0	1	1	0	1	0	1	0	1	0	1	0	0	0	0	1	1	0	0
124	Female	15	1	1	0	0	0	1	0	0	1	0	1	0	0	0	1	0	0	1	1	1	0	0	0
125	Female	14	1	1	1	0	0	1	1	0	1	0	0	0	0	0	1	0	0	0	1	1	1	1	0
126	Female	14	1	0	0	0	0	0	0	0	1	0	0	0	0	0	1	0	0	0	0	0	1	0	0
127	Female	19	1	0	0	0	0	0	0	0	1	0	0	0	0	0	1	0	0	1	1	1	0	0	0
128	Female	17	1	0	0	0	0	0	0	0	1	0	0	0	0	0	1	0	0	0	0	1	0	0	0
129	Female	13	1	0	1	0	0	1	0	0	1	1	0	0	1	0	1	0	0	0	1	1	0	0	0
130	Female	10	1	1	0	0	0	1	0	0	1	1	0	0	0	1	0	0	0	0	0	1	0	0	0
131	Female	14	1	0	0	0	0	0	0	0	1	0	0	1	0	0	0	0	0	0	1	0	0	0	0
132	Female	13	1	1	1	0	1	0	0	0	1	1	0	0	1	0	1	0	0	0	1	1	0	0	0
133	Female	13	1	1	1	0	1	0	0	0	1	1	0	0	1	0	1	0	0	0	1	1	0	0	0
134	Female	15	1	0	0	0	0	1	0	0	1	1	0	0	0	0	1	0	0	0	1	1	0	0	0
135	Female	17	1	1	0	0	0	0	1	1	1	0	0	0	1	1	1	0	0	1	1	1	1	0	0
136	Female	19	1	1	0	0	0	0	1	1	1	0	0	1	1	0	1	0	0	1	1	1	0	0	0
137	Female	11	1	1	1	0	0	0	0	1	1	0	1	1	1	1	0	0	0	0	1	0	1	1	0
138	Female	18	1	1	1	0	0	0	0	0	1	0	0	1	0	0	0	1	0	1	1	1	1	1	0
139	Male	14	1	1	1	0	0	1	0	0	1	0	0	0	0	0	0	0	0	0	1	0	0	0	0
140	Female	17	1	0	0	0	0	0	0	0	1	0	0	1	1	1	1	0	0	1	1	1	1	0	0
141	Female	18	1	0	0	0	0	0	0	0	1	1	0	0	1	1	1	0	0	0	1	0	0	0	0
142	Female	14	1	1	0	0	0	1	0	0	1	0	0	1	0	1	1	0	0	1	1	0	0	0	0
143	Female	15	1	0	0	0	0	0	0	0	1	1	1	1	0	0	1	0	0	1	1	0	0	0	0
144	Female	18	1	0	0	0	0	0	0	0	1	1	0	1	0	1	1	0	0	0	1	1	1	0	0
145	Female	17	1	1	0	0	0	1	0	0	1	1	0	1	0	0	1	0	0	1	1	0	1	0	0
146	Female	17	1	1	0	0	0	1	0	0	1	0	0	1	0	0	1	0	0	0	1	1	1	1	0
147	Female	15	1	0	0	0	0	1	1	0	1	0	0	1	0	0	1	0	0	1	1	1	1	0	0
148	Female	14	1	1	0	0	0	0	0	0	1	0	0	1	0	0	1	0	0	0	1	1	0	0	0
149	Female	14	1	0	0	0	0	0	0	0	1	0	0	1	0	0	1	0	0	0	1	1	0	0	0
150	Female	13	1	0	0	0	0	0	0	0	1	0	0	1	0	0	1	0	0	0	1	0	0	0	0
151	Female	17	1	0	0	0	0	0	0	0	1	0	0	1	0	0	1	0	0	0	1	0	0	0	0
152	Female	15	1	1	0	0	0	0	0	0	1	0	1	0	0	0	1	0	0	1	1	1	1	0	0
153	Female	15	1	0	0	0	0	1	0	0	1	1	0	0	0	0	1	0	0	0	1	1	0	0	0
154	Female	17	1	0	0	0	0	0	1	0	1	0	0	0	0	0	1	0	0	0	1	1	0	0	0
155	Female	18	1	1	0	0	0	0	0	0	1	0	0	0	0	0	1	0	0	0	1	1	1	0	0
156	Female	17	1	0	0	0	0	0	0	0	1	0	0	1	0	0	0	0	0	0	1	0	0	0	0
157	Female	19	1	0	0	0	0	0	0	0	1	0	0	1	0	0	0	0	1	0	0	0	0	0	0
158	Female	16	1	1	0	0	0	0	1	0	0	0	0	0	0	0	1	0	0	0	1	0	0	0	0
159	Female	18	1	0	0	0	1	1	0	1	1	0	0	1	0	1	1	0	0	0	1	1	0	0	0
160	Female	16	1	1	0	1	0	0	1	1	1	1	0	1	1	0	1	0	0	0	1	0	0	0	0
161	Male	17	1	1	0	0	1	1	0	0	1	1	1	1	1	1	1	0	0	0	0	0	1	1	0
162	Female	18	1	1	0	1	1	1	0	0	1	0	0	1	1	1	1	0	0	1	1	1	0	0	0
163	Female	18	1	1	0	0	1	1	0	0	1	0	1	0	0	1	1	0	0	1	1	0	1	0	0
164	Female	12	1	1	0	0	1	0	1	0	1	0	0	0	0	1	1	0	1	0	0	0	0	0	0
165	Female	14	1	1	0	0	0	0	1	0	1	0	1	0	0	0	1	0	0	1	1	1	0	0	0
166	Female	18	1	1	1	1	1	0	0	1	0	0	0	0	0	0	1	0	0	1	1	1	1	0	0
167	Female	12	1	1	0	0	1	0	0	0	0	0	0	0	0	0	1	0	0	1	0	0	0	0	0
168	Female	14	1	0	0	0	0	0	0	0	1	0	0	1	0	0	0	0	0	0	0	1	1	0	0
169	Female	17	1	1	0	0	1	0	1	1	1	0	0	1	0	0	1	0	0	1	1	1	1	0	0
170	Male	15	1	0	1	0	0	0	0	0	1	0	0	0	0	0	0	1	0	0	1	0	1	0	0
171	Female	18	1	1	0	1	1	1	0	0	1	0	0	0	1	1	1	0	0	0	1	1	1	0	0
172	Female	19	1	1	0	0	0	0	0	1	1	0	0	1	1	0	1	0	0	1	1	1	0	0	0
173	Female	19	1	0	1	0	0	1	0	1	1	0	0	1	0	0	1	0	0	1	1	1	1	0	0
174	Female	19	1	1	1	0	0	1	0	1	1	0	0	1	0	0	1	0	0	1	1	1	1	0	0
175	Female	17	1	0	0	0	0	0	0	1	1	0	0	1	0	0	1	0	0	1	1	1	0	0	0
176	Female	13	1	1	0	0	0	0	1	1	1	0	0	1	0	0	0	0	0	0	1	0	0	0	0
177	Male	14	1	0	0	0	0	0	0	0	1	0	0	0	0	1	1	1	0	0	1	0	1	0	0
178	Female	18	1	0	0	0	0	1	0	0	1	0	0	0	0	1	1	1	0	1	1	0	0	0	0
179	Female	17	1	0	1	0	0	0	0	0	1	0	0	0	0	0	0	0	0	1	0	0	0	0	0
180	Female	18	1	1	0	0	0	0	0	0	1	1	0	0	1	1	1	0	0	1	1	1	1	0	0
181	Female	15	1	1	0	0	0	0	0	0	1	0	0	0	1	1	1	0	0	0	1	0	0	0	0
182	Female	18	1	1	1	0	0	1	0	0	1	0	0	0	1	1	1	0	0	0	1	0	0	0	0
183	Female	18	1	1	0	0	0	1	0	0	1	0	0	1	0	1	1	0	0	1	0	0	0	1	0
184	Female	15	1	0	1	0	0	1	0	0	1	0	0	1	0	1	1	0	0	0	1	0	1	0	0
185	Female	18	1	0	0	0	0	1	0	0	1	0	1	0	0	1	1	0	0	1	1	1	0	0	0
186	Female	16	1	0	0	0	0	0	0	0	1	0	0	0	0	1	1	0	0	1	1	1	1	0	0
187	Female	18	1	1	1	0	0	0	0	0	1	0	0	0	0	1	1	0	0	1	1	1	0	0	0
188	Female	19	1	0	0	0	0	0	0	0	1	0	0	0	0	1	1	0	0	1	1	0	0	0	0
189	Female	17	1	0	0	0	0	1	0	0	1	0	0	1	1	0	1	0	0	1	1	1	1	0	0
190	Female	15	1	1	1	0	0	0	0	0	1	0	0	1	1	0	1	0	0	0	1	1	0	0	0
191	Female	19	1	0	0	0	0	0	0	0	1	0	0	1	1	0	1	0	0	0	1	1	0	0	0
192	Female	18	1	0	0	0	0	0	0	0	1	0	0	1	1	0	1	0	0	1	1	0	0	0	0
193	Female	18	1	0	0	0	0	0	0	0	1	0	0	0	1	0	1	0	0	1	0	1	0	0	0
194	Female	18	1	1	0	0	0	0	0	0	1	1	0	1	0	0	1	0	0	0	1	0	1	0	0
195	Male	19	1	0	0	0	0	0	1	0	1	1	0	1	0	0	1	0	0	1	0	0	0	0	0
196	Female	13	1	1	0	0	0	1	0	0	1	0	0	1	0	0	1	0	0	0	1	0	0	0	1
197	Female	16	1	0	0	0	0	1	0	0	1	0	0	1	0	0	1	0	0	1	1	1	1	0	0
198	Female	19	1	0	1	0	0	0	0	0	1	0	0	1	0	0	1	0	0	1	1	1	1	0	0
199	Female	17	1	0	0	0	0	0	0	0	1	0	0	1	0	0	1	0	0	1	1	0	1	0	0
200	Female	17	1	0	0	0	0	0	0	0	1	0	0	1	0	0	1	0	0	1	0	0	1	0	0
201	Female	19	1	1	0	0	0	0	0	0	1	0	0	1	0	0	1	0	0	0	1	1	0	0	0
202	Female	17	1	0	1	0	0	0	0	0	1	0	0	1	0	0	1	0	0	0	0	1	0	0	0
203	Female	19	1	1	0	0	0	0	0	0	1	0	0	1	0	0	1	0	0	1	0	0	0	0	0
204	Female	19	1	0	0	0	0	0	0	0	1	0	1	0	0	0	1	0	0	1	1	1	0	0	0
205	Female	18	1	1	1	0	0	0	0	0	1	0	1	0	0	0	1	0	0	0	1	0	0	0	0
206	Female	12	1	0	0	0	0	0	0	0	1	0	0	0	0	0	1	0	0	0	1	1	0	0	0
207	Female	17	1	0	0	0	0	0	0	0	1	0	0	0	0	0	1	0	0	1	1	1	1	1	0
208	Female	18	1	0	0	0	0	0	0	0	1	0	0	0	0	0	1	0	0	1	1	1	1	0	0
209	Female	18	1	0	0	0	0	0	0	0	1	0	0	0	0	0	1	0	0	0	1	1	1	0	0
210	Female	16	1	0	0	0	0	0	1	0	1	0	0	0	0	0	1	0	0	1	1	0	1	0	0
211	Female	18	1	0	0	0	0	0	0	0	1	0	0	0	0	0	1	0	0	1	0	1	1	0	0
212	Female	19	1	1	0	0	0	0	1	0	1	0	0	0	0	0	1	0	0	1	1	1	0	0	0
213	Female	17	1	0	0	0	0	0	0	0	1	0	0	0	0	0	1	0	0	1	1	0	0	0	0
214	Female	14	1	1	0	0	0	1	0	0	1	0	0	0	0	0	1	0	0	1	1	0	0	0	0
215	Female	13	1	0	0	0	0	0	0	0	1	0	0	0	0	0	1	0	0	0	1	0	0	0	0
216	Female	18	1	0	1	0	0	0	0	0	1	0	0	0	0	0	1	0	0	0	1	0	0	0	0
217	Female	17	1	0	1	0	0	0	0	0	1	0	0	0	0	0	1	0	0	0	1	0	0	0	0
218	Female	17	1	0	0	0	0	0	0	0	1	0	0	0	0	0	1	0	0	0	1	0	0	0	0
219	Female	17	1	0	1	0	0	0	0	0	1	0	0	0	0	0	1	0	0	0	1	0	0	0	0
220	Female	18	1	0	0	0	0	0	0	0	1	0	0	0	0	0	1	0	0	0	0	1	0	0	0
221	Female	18	1	0	0	0	0	0	0	0	1	0	0	0	0	0	1	0	0	0	0	1	0	0	0
222	Female	16	1	0	0	0	0	0	0	0	1	0	0	0	0	0	1	0	1	0	0	0	0	0	0
223	Female	19	1	0	0	0	0	0	0	0	1	0	0	1	1	1	0	0	0	1	1	1	0	0	0
224	Female	16	1	0	0	0	0	0	0	0	1	0	0	1	0	1	0	0	0	0	1	0	0	0	0
225	Female	12	1	0	0	0	0	1	0	0	1	0	0	0	0	1	0	0	0	0	1	0	0	0	0
226	Female	18	1	0	0	0	0	0	0	0	1	0	0	1	1	0	0	0	0	0	1	0	0	0	0
227	Female	16	1	0	0	0	0	0	0	0	1	0	0	0	1	0	0	0	0	0	1	0	0	0	0
228	Female	17	1	0	0	0	0	0	1	0	1	0	0	1	0	0	0	0	0	0	1	1	1	0	0
229	Female	19	1	0	0	0	0	0	0	0	1	0	0	1	0	0	0	0	0	1	1	1	1	0	0
230	Female	18	1	0	1	0	0	0	0	0	1	0	0	1	0	0	0	0	0	0	1	0	1	0	0
231	Female	17	1	0	0	0	0	1	1	0	1	0	0	1	0	0	0	0	0	0	0	1	1	0	0
232	Female	17	1	0	0	0	0	0	0	0	1	0	0	1	0	0	0	0	0	0	1	0	0	0	0
233	Female	14	1	0	0	0	0	0	0	0	1	0	0	1	0	0	0	0	0	0	1	0	0	0	0
234	Female	17	1	0	1	0	0	0	0	0	1	0	0	1	0	0	0	0	0	0	1	0	0	0	0
235	Female	19	1	0	0	0	0	0	0	0	1	0	0	1	0	0	0	0	0	0	0	1	0	0	0
236	Female	18	1	0	0	0	0	0	0	0	1	0	0	1	0	0	0	0	0	1	0	0	0	0	0
237	Female	16	1	0	1	0	0	0	0	0	1	0	1	0	0	1	0	0	0	1	1	0	1	0	0
238	Male	18	1	1	1	1	0	1	0	0	0	0	0	0	0	0	1	0	0	0	1	1	0	0	0
239	Female	14	1	1	1	0	0	0	0	0	0	0	0	0	0	0	1	0	0	1	1	0	1	0	1
240	Female	15	1	1	0	0	0	0	1	0	0	0	0	0	1	1	0	0	0	0	1	0	1	0	0
241	Female	14	1	1	1	0	1	0	0	0	1	0	0	1	0	0	0	0	0	0	1	0	1	1	1
242	Female	16	1	0	1	0	1	0	1	0	1	1	0	0	1	0	1	0	0	0	1	0	0	0	0
243	Female	19	1	0	0	0	1	0	0	0	1	0	0	1	0	0	1	0	0	0	1	1	0	0	0
244	Female	15	1	1	1	0	1	0	0	0	1	1	1	0	0	0	1	0	0	0	1	0	1	0	0
245	Female	19	1	1	1	0	1	0	1	0	1	1	0	0	0	0	1	0	0	1	1	1	0	0	0
246	Female	18	1	0	0	0	1	0	0	0	1	0	0	0	0	0	1	0	0	0	1	0	0	0	0
247	Female	15	1	1	1	1	1	0	1	0	1	0	0	1	0	0	1	0	0	0	1	1	1	0	0
248	Female	18	1	1	1	0	1	1	0	0	1	0	0	1	1	0	0	0	0	0	1	0	0	0	0
249	Female	14	1	1	0	0	0	0	0	0	1	1	0	0	1	0	0	0	0	0	1	0	1	0	0
250	Female	17	1	0	0	0	0	1	0	0	1	0	0	0	0	1	1	0	0	0	1	0	1	0	0
251	Female	17	1	1	0	0	0	1	0	1	1	0	0	0	0	1	1	0	0	1	1	1	0	0	0
252	Female	14	1	0	0	0	0	0	0	1	1	0	0	1	0	0	1	0	0	0	1	0	0	0	0
253	Female	19	1	1	0	0	0	1	0	1	1	0	0	1	0	0	1	0	0	1	1	1	1	0	0
254	Female	14	1	1	1	0	0	0	0	1	1	0	1	0	0	0	1	0	0	0	1	0	0	0	0
255	Female	14	1	1	0	0	0	0	0	1	1	0	0	0	0	0	1	0	0	0	0	0	0	0	1
256	Female	18	1	0	0	0	0	0	0	0	1	0	0	0	0	0	0	0	0	0	1	0	1	0	0
257	Female	19	1	1	0	0	0	1	0	0	1	0	0	1	1	1	1	0	0	1	0	1	0	0	0
258	Female	17	1	0	1	0	0	1	0	0	1	0	0	0	0	1	1	0	0	1	1	1	0	0	0
259	Female	17	1	0	0	0	0	1	0	0	1	0	0	0	0	1	1	0	0	1	1	0	1	0	0
260	Male	15	1	0	0	0	0	0	0	0	1	0	0	0	0	1	1	0	0	0	1	0	1	0	0
261	Female	13	1	0	0	0	0	1	0	0	1	0	0	0	0	1	1	0	0	0	1	0	0	0	0
262	Female	18	1	1	1	0	0	1	0	0	1	0	0	1	1	0	1	0	0	1	1	1	0	0	0
263	Female	18	1	1	1	0	0	0	0	0	1	0	0	0	1	0	1	0	0	0	1	1	1	0	0
264	Female	15	1	0	0	0	0	1	0	0	1	0	0	0	1	0	1	0	0	1	1	0	1	0	0
265	Female	17	1	1	0	0	0	1	0	0	1	0	0	1	0	0	1	0	0	0	1	1	1	0	0
266	Female	14	1	1	0	0	0	0	0	0	1	0	0	1	0	0	1	0	0	0	1	1	0	0	0
267	Female	16	1	1	0	0	0	0	0	0	1	0	0	1	0	0	1	0	0	0	1	0	0	0	0
268	Female	14	1	1	0	0	0	1	0	0	1	0	0	0	0	0	1	0	0	0	1	0	1	0	0
269	Female	13	1	1	0	0	0	1	0	0	1	0	0	0	0	0	1	0	0	0	1	1	1	0	0
270	Female	17	1	1	0	0	0	1	0	0	1	0	0	0	0	0	1	0	0	1	1	1	0	0	0
271	Female	18	1	0	0	0	0	1	0	0	1	1	0	0	1	1	0	0	0	0	1	0	1	0	0
272	Female	14	1	0	0	0	0	1	0	0	1	0	0	0	1	0	0	0	0	0	1	0	1	0	0
273	Female	15	1	1	1	0	1	0	0	0	1	0	1	1	0	0	1	0	0	0	0	0	1	1	1
274	Female	16	1	1	0	0	0	1	0	0	1	1	0	0	1	1	1	0	0	0	1	1	0	0	0
275	Female	16	1	1	0	0	1	1	0	0	1	0	0	0	0	1	1	0	0	1	1	1	0	0	0
276	Female	15	1	1	0	0	1	0	0	0	1	0	0	0	0	0	1	0	0	0	1	1	0	0	0
277	Female	11	1	0	0	0	1	1	0	0	0	1	0	0	0	0	1	0	0	1	1	1	1	0	0
278	Female	17	1	1	1	0	0	1	1	0	1	0	0	1	1	1	1	0	0	0	1	1	0	0	0
279	Female	17	1	0	0	0	0	0	0	0	1	0	0	0	1	1	1	0	0	1	0	1	0	0	0
280	Female	18	1	1	0	0	0	1	0	0	1	0	0	0	0	0	1	0	0	0	1	0	0	0	0
281	Female	14	1	1	1	0	1	1	1	0	1	0	0	0	0	0	1	0	0	1	1	1	1	0	0
282	Male	18	1	1	0	1	1	1	0	0	0	1	0	0	1	1	1	0	0	0	1	1	1	0	0
283	Female	15	1	0	0	0	0	0	0	0	1	0	0	0	0	1	1	1	0	1	0	1	0	0	0
284	Female	17	1	0	0	0	0	1	0	0	1	0	0	0	0	0	1	0	0	1	1	1	0	0	0
285	Female	14	1	1	1	0	0	0	0	1	1	1	0	1	0	0	1	1	0	1	1	0	1	0	1
286	Female	12	1	0	0	0	0	1	0	1	1	0	0	0	0	0	0	1	0	0	0	0	0	0	1
287	Female	19	1	0	0	0	0	1	0	1	1	0	0	1	1	0	1	0	0	0	1	1	1	1	0
288	Female	19	1	0	0	0	0	0	0	1	1	1	1	1	0	0	1	0	0	1	1	1	0	0	0
289	Female	17	1	0	0	0	0	0	0	0	1	0	0	0	0	1	1	1	0	0	1	1	0	0	0
290	Female	15	1	0	1	0	0	1	0	0	1	1	0	0	1	1	0	1	0	1	1	0	0	0	1
291	Female	18	1	0	0	0	0	0	0	0	1	0	0	0	0	0	0	0	0	1	1	1	0	0	0
292	Female	19	1	1	1	0	0	0	0	0	1	0	0	1	1	1	1	0	0	1	1	1	1	0	0
293	Female	16	1	1	0	0	0	1	0	0	1	0	0	1	1	1	1	0	0	1	1	1	0	0	0
294	Female	17	1	1	0	0	0	0	0	0	1	1	1	0	1	1	1	0	0	1	1	0	0	0	1
295	Female	17	1	1	0	0	0	1	0	0	1	0	0	0	1	1	1	0	0	0	1	1	0	0	0
296	Female	16	1	1	0	0	0	1	1	0	1	0	0	0	1	1	1	0	0	1	1	1	1	0	0
297	Female	18	1	1	1	0	0	1	0	0	1	0	0	1	0	1	1	0	0	0	1	0	1	0	0
298	Female	17	1	0	0	0	0	0	0	0	1	0	0	1	0	1	1	0	0	0	1	0	1	0	0
299	Female	18	1	0	0	0	0	1	0	0	1	0	0	1	0	1	1	0	0	1	0	0	0	0	0
300	Female	17	1	1	0	0	0	0	0	0	1	0	0	0	0	1	1	0	0	0	1	1	1	0	0
301	Female	19	1	0	1	0	0	1	0	0	1	0	0	0	0	1	1	0	0	1	1	1	0	0	0
302	Female	19	1	0	1	0	0	1	0	0	1	0	0	0	0	1	1	0	0	1	1	1	1	0	0
303	Female	17	1	1	0	0	0	1	0	0	1	0	0	0	0	1	1	0	0	0	1	1	1	0	0
304	Female	17	1	1	1	0	0	1	0	0	1	0	0	0	0	1	1	0	0	1	1	1	0	0	0
305	Female	16	1	0	0	0	0	1	0	0	1	0	0	0	0	1	1	0	0	0	1	1	0	0	0
306	Female	17	1	1	1	0	0	1	0	0	1	0	0	0	0	1	1	0	0	1	1	0	0	0	0
307	Female	18	1	0	1	0	0	1	0	0	1	0	0	0	0	1	1	0	0	1	1	0	0	0	0
308	Female	13	1	0	0	0	0	0	0	0	1	0	0	0	0	1	1	0	0	0	1	0	0	0	0
309	Female	13	1	1	0	0	0	1	0	0	1	1	1	0	1	0	1	0	0	0	1	1	0	0	0
310	Male	19	1	1	1	0	0	1	1	0	1	0	0	0	1	0	1	0	0	0	1	1	0	0	0
311	Female	18	1	1	0	0	0	0	0	0	1	0	0	1	0	0	1	0	0	0	1	0	0	0	0
312	Female	17	1	1	0	0	0	1	0	0	1	0	0	1	0	0	1	0	0	1	1	1	0	0	0
313	Female	17	1	0	1	0	0	0	0	0	1	0	0	1	0	0	1	0	0	0	1	0	0	0	0
314	Female	18	1	1	1	0	0	1	0	0	1	0	0	1	0	0	1	0	0	1	1	1	1	0	0
315	Female	19	1	0	1	0	0	1	0	0	1	0	0	0	0	0	1	0	0	0	1	1	0	0	0
316	Female	17	1	0	1	0	0	0	1	0	1	0	0	0	0	0	1	0	0	0	1	1	1	0	0
317	Female	17	1	1	0	0	0	0	0	0	1	0	0	0	0	0	1	0	0	1	1	0	1	0	0
318	Female	15	1	0	1	0	0	0	0	0	1	0	0	0	0	0	1	0	0	1	1	0	1	0	0
319	Female	11	1	1	0	0	0	1	1	0	1	0	0	0	0	0	1	0	0	0	1	0	1	1	0
320	Female	18	1	0	0	0	0	0	0	0	1	0	0	0	0	0	1	0	0	1	1	1	0	0	0
321	Female	17	1	0	1	0	0	1	0	0	1	0	0	0	0	0	1	0	0	0	1	1	0	0	0
322	Female	18	1	0	0	0	0	0	0	0	1	0	0	0	0	0	1	0	0	0	1	1	0	0	0
323	Female	18	1	0	0	0	0	0	0	0	1	0	0	0	0	0	1	0	0	0	1	0	0	0	0
324	Female	17	1	0	0	0	0	0	0	0	1	0	0	0	0	0	1	0	0	0	1	0	0	0	0
325	Female	17	1	0	0	0	0	0	0	0	1	0	0	0	1	1	0	0	0	1	1	0	0	0	0
326	Female	13	1	1	0	0	0	1	1	0	1	0	0	0	0	1	0	0	0	1	0	1	0	0	0
327	Female	17	1	0	0	0	0	1	0	0	1	0	1	1	0	0	0	0	1	0	0	0	0	0	0
328	Female	19	1	1	1	0	0	0	0	0	1	0	0	1	0	0	0	0	0	1	1	1	1	0	0
329	Female	19	1	0	0	0	0	0	0	0	1	0	0	1	0	0	0	0	0	0	1	0	0	0	0
330	Female	18	1	0	0	0	0	0	0	0	1	1	0	1	0	0	0	0	1	0	0	0	0	0	0
331	Female	15	1	1	1	0	0	1	1	0	0	0	0	0	1	1	1	0	0	1	1	1	1	1	0
332	Female	17	1	1	0	0	0	1	0	0	0	0	0	0	1	0	1	0	0	0	1	0	0	0	0
333	Female	15	1	1	0	0	0	1	0	0	0	0	0	0	0	0	1	0	0	0	0	1	0	0	0
334	Female	19	1	0	0	0	0	1	0	0	0	0	0	0	0	0	1	0	0	0	0	1	0	0	0
335	Female	17	1	0	0	0	0	1	0	0	0	0	0	0	0	1	0	0	1	0	0	0	0	0	0
336	Female	18	1	1	0	0	0	1	0	0	0	0	0	0	1	0	0	0	0	0	0	1	0	0	0
337	Female	16	1	0	0	0	0	1	0	0	0	0	1	0	1	0	0	0	0	1	1	0	1	0	0
338	Female	15	1	0	0	0	0	0	1	0	0	0	0	1	0	0	0	0	0	0	1	1	1	1	0
339	Female	15	1	0	0	0	0	1	1	0	0	0	0	1	0	0	0	0	0	0	1	1	1	0	0
340	Female	14	1	1	0	0	1	1	1	1	1	0	0	0	1	1	1	0	0	1	0	1	1	0	0
341	Male	18	1	0	0	0	1	0	0	1	1	0	0	0	0	0	1	0	0	0	1	0	0	0	0
342	Male	15	1	0	1	0	0	0	0	0	1	0	0	1	1	1	1	0	0	0	1	0	1	1	0
343	Female	16	1	1	1	0	1	1	0	0	1	0	0	0	1	1	1	0	0	0	1	1	0	0	0
344	Female	16	1	1	1	0	1	0	0	0	1	0	0	1	1	0	1	0	0	0	1	0	0	0	0
345	Female	16	1	1	1	0	1	1	1	0	1	0	0	1	0	0	1	0	0	0	1	0	0	0	0
346	Female	15	1	1	0	0	0	0	1	0	1	0	0	0	0	0	1	0	0	1	1	0	1	0	0
347	Female	12	1	1	0	0	0	0	0	0	1	0	0	0	0	0	1	0	0	0	1	0	0	0	0
348	Female	16	1	0	1	0	1	0	0	0	1	0	0	0	0	0	1	0	1	0	0	0	0	0	0
349	Female	16	1	1	1	0	1	0	0	0	1	0	0	0	1	1	0	0	0	1	1	0	1	0	0
350	Female	15	1	0	0	0	0	0	0	0	1	0	1	0	0	0	0	0	0	1	0	0	0	0	0
351	Female	17	1	1	1	0	1	0	0	0	0	0	0	0	1	0	1	0	0	1	1	1	1	0	0
352	Female	18	1	0	0	0	1	1	0	0	0	1	0	1	1	1	1	0	0	1	1	1	0	0	0
353	Female	19	1	0	1	0	1	0	0	0	0	1	0	0	0	1	0	0	0	0	1	0	0	0	0
354	Female	13	1	1	0	0	0	0	1	0	1	1	1	0	1	1	1	0	0	1	1	0	0	0	0
355	Female	13	1	0	0	0	0	0	0	0	1	0	0	0	0	1	1	0	0	0	1	0	1	0	0
356	Female	19	1	1	0	0	0	0	0	0	1	1	1	1	0	0	1	0	0	0	1	0	1	0	0
357	Female	16	1	1	1	0	0	0	0	0	1	0	0	0	0	0	1	0	0	0	1	0	0	0	0
358	Female	17	1	0	0	0	0	0	0	0	1	0	0	0	0	0	1	0	0	0	1	1	0	0	0
359	Female	15	1	1	0	0	0	0	1	0	1	0	0	1	1	1	0	0	0	1	1	1	1	0	0
360	Female	18	1	0	0	0	0	0	0	0	1	1	0	1	0	0	0	0	0	1	1	0	0	0	0
361	Female	15	1	1	0	0	0	0	1	0	1	0	0	1	0	0	0	0	0	0	0	0	0	0	1
362	Female	17	1	0	1	0	0	0	0	0	1	0	0	1	0	0	0	0	0	0	1	0	0	0	0
363	Male	14	1	0	1	0	0	0	0	0	1	0	0	1	0	0	0	0	0	0	1	0	0	0	0
364	Female	19	1	0	0	0	0	0	0	1	0	0	0	0	0	1	0	0	0	0	0	1	0	0	0
365	Female	17	1	1	0	1	1	0	0	0	1	0	0	0	0	0	1	0	0	0	1	0	1	1	0
366	Female	13	1	0	0	0	0	0	0	0	1	0	0	0	0	0	1	0	0	0	1	0	0	0	0
367	Female	14	1	1	0	0	0	0	0	0	1	0	0	0	0	1	0	0	0	1	0	0	0	0	0
368	Female	12	1	1	0	0	0	0	0	0	0	1	0	0	0	0	1	0	0	1	0	0	0	0	0
369	Female	18	1	1	0	1	0	1	0	1	1	0	0	1	0	1	1	0	0	1	1	1	0	0	0
370	Female	19	1	0	1	0	0	1	0	1	1	0	0	1	0	0	1	0	1	0	0	0	0	0	0
371	Female	17	1	0	0	0	0	0	0	1	1	0	0	0	0	0	1	0	0	1	0	0	0	0	0
372	Female	17	1	0	0	0	0	0	0	1	1	0	0	0	0	0	1	0	0	1	1	1	1	0	0
373	Female	16	1	0	1	0	0	0	0	1	1	0	0	1	0	0	0	0	0	0	1	1	0	0	0
374	Female	15	1	0	1	0	0	0	0	0	1	1	0	0	0	0	1	1	0	0	1	0	0	0	0
375	Female	19	1	0	0	0	0	1	0	0	1	0	0	0	0	0	0	1	0	0	1	1	1	0	0
376	Female	14	1	1	1	0	0	1	0	0	1	0	1	0	1	1	1	0	0	0	1	0	1	0	0
377	Female	17	1	0	0	0	0	0	0	0	1	1	0	0	0	0	0	0	0	0	0	0	0	0	0
378	Female	17	1	0	1	0	0	0	0	0	1	0	0	1	1	1	1	0	0	0	1	1	0	0	0
379	Female	16	1	1	1	0	0	0	1	0	1	0	0	0	1	1	1	0	0	1	1	1	1	0	0
380	Female	16	1	1	0	0	0	0	0	0	1	0	0	0	1	1	1	0	0	1	1	1	1	0	0
381	Female	14	1	1	1	0	0	0	0	0	1	0	0	0	1	1	1	0	0	0	1	1	0	0	0
382	Female	18	1	0	0	0	0	1	0	0	1	0	0	0	1	1	1	0	0	1	0	1	0	0	0
383	Female	15	1	0	0	0	0	0	0	0	1	0	0	0	1	1	1	0	1	0	0	0	0	0	0
384	Female	17	1	0	0	0	0	0	0	0	1	0	0	1	0	1	1	0	0	1	1	1	1	0	0
385	Female	17	1	1	1	0	0	0	0	0	1	0	0	1	0	1	1	0	0	0	1	1	1	0	0
386	Female	14	1	0	0	0	0	0	0	0	1	1	1	0	0	1	1	0	0	0	0	1	0	0	0
387	Female	13	1	1	1	0	0	1	0	0	1	0	0	0	0	1	1	0	0	1	1	1	1	0	0
388	Female	16	1	1	1	0	0	0	1	0	1	0	0	0	0	1	1	0	0	1	1	0	1	0	0
389	Female	17	1	1	1	0	0	1	0	0	1	0	0	0	0	1	1	0	0	0	1	1	0	0	0
390	Female	17	1	0	0	0	0	0	0	0	1	0	0	0	0	1	1	0	0	0	1	0	0	0	0
391	Female	17	1	1	1	0	0	0	0	0	1	0	0	0	0	1	1	0	0	1	0	0	0	0	0
392	Female	19	1	0	0	0	0	0	0	0	1	0	0	0	0	1	1	0	0	0	0	0	0	0	0
393	Female	18	1	1	0	0	0	0	0	0	1	0	0	1	1	0	1	0	0	1	1	1	1	0	0
394	Female	17	1	1	0	0	0	0	0	0	1	0	0	1	1	1	1	0	0	0	1	0	0	0	0
395	Female	18	1	0	0	0	0	0	0	0	1	0	0	1	1	0	1	0	0	0	1	1	0	1	0
396	Female	13	1	0	0	0	0	0	0	0	1	0	0	1	1	0	1	0	0	0	0	1	0	0	0
397	Female	19	1	0	0	0	0	0	0	0	1	0	0	0	1	0	1	0	0	1	1	1	0	0	0
398	Female	17	1	0	1	0	0	0	0	0	1	0	0	0	1	0	1	0	0	0	1	0	0	0	0
399	Female	19	1	0	0	1	0	0	0	0	1	0	0	0	1	0	1	0	0	1	1	1	1	0	0
400	Female	19	1	0	1	0	0	0	0	0	1	0	0	0	1	0	1	0	0	0	1	0	1	0	0
401	Female	13	1	0	0	0	0	0	0	0	1	0	0	0	1	0	1	0	0	0	1	1	0	0	0
402	Female	19	1	0	0	0	0	0	0	0	1	0	0	0	1	0	1	0	0	1	1	0	0	0	0
403	Female	17	1	0	1	0	0	0	0	0	1	1	0	1	0	0	1	0	0	1	1	1	0	0	0
404	Female	17	1	0	0	0	0	0	0	0	1	0	0	1	0	0	1	0	0	1	1	1	0	0	0
405	Female	18	1	0	0	0	0	0	0	0	1	0	0	1	0	0	1	0	0	0	1	0	0	0	0
406	Female	15	1	0	0	0	0	0	0	0	1	0	0	1	0	0	1	0	1	0	0	0	0	0	0
407	Female	17	1	0	0	0	0	0	0	0	1	0	0	1	0	0	1	0	0	0	1	0	0	1	0
408	Female	18	1	0	0	0	0	0	0	0	1	0	0	1	0	0	1	0	0	0	1	1	1	0	0
409	Female	17	1	0	1	0	0	0	0	0	1	0	0	1	0	0	1	0	0	0	1	1	1	0	0
410	Female	19	1	0	0	0	0	0	0	0	1	0	0	1	0	0	1	0	0	0	1	1	1	0	0
411	Female	17	1	0	1	0	0	0	0	0	1	0	0	1	0	0	1	0	0	0	1	1	1	0	0
412	Female	17	1	0	0	0	0	0	0	0	1	0	0	1	0	0	1	0	0	0	1	1	1	0	0
413	Female	18	1	1	1	0	0	0	0	0	1	0	0	1	0	0	1	0	0	1	1	0	1	0	0
414	Female	14	1	1	0	0	0	0	0	0	1	0	0	1	0	0	1	0	0	0	1	0	1	0	0
415	Female	19	1	0	0	0	0	0	0	0	1	0	0	1	0	0	1	0	0	0	1	0	1	0	0
416	Female	18	1	0	1	0	0	0	0	0	1	0	0	1	0	0	1	0	0	1	0	0	1	0	0
417	Female	17	1	0	0	0	0	0	0	0	1	0	0	1	0	0	1	0	0	1	0	0	1	0	0
418	Female	19	1	0	0	0	0	0	0	0	1	0	0	1	0	0	1	0	0	1	1	1	0	0	0
419	Female	19	1	0	0	0	0	0	0	0	1	0	0	1	0	0	1	0	0	1	1	1	0	0	0
420	Female	16	1	1	0	0	0	0	0	0	1	0	0	1	0	0	1	0	0	1	1	1	0	0	0
421	Female	19	1	0	0	0	0	1	0	0	1	0	0	1	0	0	1	0	0	0	1	1	0	0	0
422	Female	19	1	0	1	0	0	1	0	0	1	0	0	1	0	0	1	0	0	0	1	0	0	0	0
423	Female	18	1	0	0	0	0	0	0	0	1	0	0	1	0	0	1	0	0	0	1	0	0	0	0
424	Female	18	1	0	0	0	0	1	0	0	1	0	0	1	0	0	1	0	0	0	1	0	0	0	0
425	Female	18	1	0	0	0	0	1	0	0	1	0	0	1	0	0	1	0	0	1	0	1	0	0	0
426	Female	17	1	0	0	0	0	1	0	0	1	0	0	1	0	0	1	0	0	1	0	1	0	0	0
427	Female	19	1	0	0	0	0	1	0	0	1	0	0	1	0	0	1	0	0	0	0	1	0	0	0
428	Female	18	1	0	0	0	0	0	0	0	1	0	0	1	0	0	1	0	0	1	0	0	0	0	0
429	Female	12	1	0	0	0	0	0	0	0	1	0	0	1	0	0	1	0	0	0	0	0	0	0	0
430	Female	18	1	0	0	0	0	0	0	0	1	0	0	1	0	0	1	0	0	1	1	1	1	0	0
431	Female	18	1	1	0	0	0	0	0	0	1	1	1	0	0	0	1	0	0	0	1	1	0	0	0
432	Female	19	1	1	0	0	0	0	0	0	1	0	1	0	0	0	1	0	0	0	1	0	0	0	0
433	Female	18	1	0	0	0	0	0	0	0	1	1	0	0	0	0	1	0	0	1	0	1	0	0	0
434	Female	13	1	0	1	0	0	0	0	0	1	0	0	0	0	0	1	0	0	1	1	0	0	0	0
435	Female	19	1	0	0	0	0	0	0	0	1	0	0	0	0	0	1	0	0	0	1	0	1	0	0
436	Female	14	1	0	0	0	0	1	0	0	1	0	0	0	0	0	1	0	0	0	1	0	1	0	0
437	Female	18	1	0	0	0	0	0	0	0	1	0	0	0	0	0	1	0	0	1	1	1	0	0	0
438	Female	15	1	1	0	0	0	0	0	0	1	0	0	0	0	0	1	0	0	1	1	1	0	0	0
439	Female	14	1	0	0	0	0	0	0	0	1	0	0	0	0	0	1	0	0	0	1	1	0	0	0
440	Female	15	1	0	0	0	0	0	0	0	1	0	0	0	0	0	1	0	0	0	1	1	0	0	0
441	Female	17	1	1	0	0	0	1	0	0	1	0	0	0	0	0	1	0	0	0	1	1	0	0	0
442	Female	17	1	1	1	0	0	0	0	0	1	0	0	0	0	0	1	0	0	1	1	0	0	0	0
443	Female	17	1	0	1	0	0	0	0	0	1	0	0	0	0	0	1	0	0	0	1	0	0	0	0
444	Female	19	1	0	1	0	0	0	0	0	1	0	0	0	0	0	1	0	0	0	1	0	0	0	0
445	Female	16	1	0	0	0	0	0	0	0	1	0	0	0	0	0	1	0	0	0	1	0	0	0	0
446	Female	19	1	0	1	0	0	1	0	0	1	0	0	0	0	0	1	0	0	1	0	1	0	0	0
447	Female	14	1	0	0	0	0	0	0	0	1	0	0	0	0	0	1	0	0	0	0	1	0	0	0
448	Female	18	1	0	0	0	0	0	0	0	1	0	0	0	0	0	1	0	0	0	0	1	0	0	0
449	Female	14	1	0	0	0	0	0	0	0	1	0	0	0	0	0	1	0	0	1	0	0	0	0	0
450	Male	18	1	1	0	0	0	0	0	0	1	0	0	0	0	0	1	0	0	1	0	0	0	0	0
451	Female	17	1	0	1	0	0	0	0	0	1	0	0	0	0	0	1	0	1	0	0	0	0	0	0
452	Female	18	1	1	0	0	0	0	0	0	1	0	0	0	1	1	0	0	0	1	0	1	0	0	0
453	Female	17	1	1	1	0	0	0	0	0	1	0	0	1	0	1	0	0	0	1	1	1	0	0	0
454	Female	19	1	0	1	0	0	0	0	0	1	0	0	0	0	1	0	0	0	0	1	0	1	0	0
455	Female	16	1	1	0	0	0	0	0	0	1	0	0	0	0	1	0	0	0	1	0	0	1	0	0
456	Female	16	1	1	0	0	0	0	0	0	1	0	0	0	0	1	0	0	0	0	1	0	0	0	0
457	Female	18	1	1	1	0	0	0	0	0	1	0	0	0	0	1	0	0	0	0	1	0	0	0	0
458	Female	13	1	0	0	0	0	0	0	0	1	0	0	0	0	1	0	0	0	1	0	0	0	0	0
459	Female	18	1	1	0	0	0	0	0	0	1	0	0	1	1	0	0	0	0	1	0	0	0	0	0
460	Male	14	1	0	1	0	0	0	0	0	1	1	0	0	1	0	0	0	1	0	0	0	0	0	0
461	Female	18	1	1	1	0	0	1	0	0	1	0	0	0	1	1	0	0	0	0	1	0	1	0	0
462	Female	19	1	0	1	0	0	0	0	0	1	0	0	0	1	0	0	0	0	0	0	1	0	0	0
463	Female	19	1	0	0	0	0	0	0	0	1	0	0	1	0	0	0	0	0	0	1	1	1	0	0
464	Female	18	1	0	0	0	0	0	0	0	1	0	0	1	0	0	0	0	0	0	1	1	1	0	0
465	Female	18	1	0	0	0	0	0	0	0	1	0	0	1	0	0	0	0	0	0	1	1	0	0	0
466	Female	17	1	0	0	0	0	0	0	0	1	0	0	1	0	0	0	0	0	1	0	1	0	0	0
467	Female	19	1	0	0	0	0	0	0	0	1	0	0	1	0	0	0	0	0	0	0	1	0	0	0
468	Female	18	1	0	0	0	0	0	0	0	1	0	0	1	0	0	0	0	0	1	0	0	0	0	0
469	Female	15	1	0	0	0	0	0	0	0	1	0	0	1	0	0	0	0	0	0	1	0	0	0	0
470	Male	18	1	0	0	0	0	1	0	1	0	0	0	0	0	0	0	0	0	1	1	1	1	0	0
471	Female	19	1	1	1	0	0	1	0	1	0	0	0	0	1	0	1	0	0	0	1	1	1	0	0
472	Female	15	1	0	0	0	0	1	0	1	0	0	0	0	0	0	1	0	0	0	1	0	0	0	0
473	Female	17	1	1	1	0	0	0	0	0	0	0	0	0	0	0	1	0	0	1	0	0	0	0	0
474	Male	18	1	0	0	0	0	1	0	0	0	0	0	0	0	0	0	0	1	0	0	0	0	0	0
475	Female	18	1	1	0	0	0	0	0	0	0	0	0	1	0	1	1	0	0	0	1	0	0	0	0
476	Female	14	1	1	0	0	0	1	0	0	0	0	0	0	0	0	1	0	0	1	1	1	0	0	0
477	Female	19	1	1	0	0	0	1	0	0	0	0	0	0	0	0	1	0	0	1	1	1	0	0	0
478	Female	14	1	1	0	0	0	0	0	0	0	0	0	0	0	0	1	0	0	0	1	0	0	0	0
479	Female	17	1	0	1	0	0	1	0	0	0	0	0	0	0	0	1	0	0	0	0	1	0	0	0
480	Female	19	1	1	0	0	0	0	0	0	0	0	0	0	0	0	1	0	0	1	0	0	0	0	0
481	Female	17	1	1	1	0	0	1	0	0	0	1	1	0	0	1	0	0	0	1	1	0	1	0	0
482	Female	16	1	1	0	0	0	0	0	0	0	1	1	0	0	1	0	0	0	0	0	0	0	0	0
483	Female	17	1	0	0	0	0	0	1	0	0	0	0	0	1	0	0	0	0	0	1	0	0	0	0
484	Female	17	1	1	0	0	0	0	0	0	0	0	0	0	1	0	0	0	1	0	0	0	0	0	0
485	Female	14	1	1	1	0	0	0	0	0	0	0	0	1	0	0	0	0	0	0	1	0	0	0	0
486	Female	18	1	0	0	0	0	1	0	0	0	0	0	1	0	0	0	0	0	0	0	0	0	0	0
487	Female	14	1	1	0	0	0	0	0	0	0	0	0	1	0	0	0	0	1	0	0	0	0	0	0
488	Female	14	1	0	0	0	0	0	1	0	0	0	0	1	0	0	0	0	1	0	0	0	0	0	0
489	Female	18	1	0	0	0	0	0	0	1	1	1	0	1	0	0	1	0	0	0	0	0	0	0	0
490	Female	18	1	0	0	0	0	0	0	1	1	0	0	0	0	0	1	0	0	0	1	0	1	0	0
491	Female	16	1	1	0	0	1	1	0	0	1	0	0	0	1	1	1	0	0	1	1	1	0	1	0
492	Female	13	1	0	0	0	1	0	0	0	1	0	0	1	1	0	1	0	0	0	1	0	0	0	0
493	Female	18	1	1	0	0	1	0	0	0	1	0	0	1	1	0	1	0	0	0	1	0	0	0	0
494	Female	18	1	0	1	0	0	0	0	0	1	0	0	1	0	0	1	0	0	1	1	0	0	0	0
495	Female	18	1	0	0	0	1	0	0	0	1	0	0	1	0	0	1	0	1	0	0	0	0	0	0
496	Female	16	1	1	1	0	1	0	0	0	1	0	0	0	0	0	1	0	0	0	1	0	0	1	0
497	Male	17	1	0	1	0	1	0	0	0	1	0	0	0	0	0	1	0	0	0	1	0	0	0	0
498	Female	14	1	0	0	1	1	0	0	0	1	0	0	0	0	0	1	0	0	1	0	0	0	0	0
499	Female	16	1	0	0	0	1	0	0	0	1	0	0	0	0	0	1	0	1	0	0	0	0	0	0
500	Female	18	1	0	0	0	1	0	0	0	1	1	1	0	0	0	0	0	0	1	0	0	0	0	0
501	Female	15	1	0	0	0	1	0	0	1	0	1	0	0	0	0	1	0	1	0	0	0	0	0	0
502	Female	15	1	0	0	0	0	0	0	1	0	0	0	0	0	1	0	0	0	0	1	0	0	0	0
503	Female	15	1	1	0	0	1	0	1	1	0	1	0	1	0	0	0	0	0	0	1	0	0	0	0
504	Female	12	1	1	0	0	1	0	0	0	0	0	0	0	0	1	1	0	0	0	1	0	1	0	0
505	Male	17	1	1	0	0	1	0	0	0	0	0	0	0	1	1	1	0	1	0	0	0	0	0	0
506	Female	19	1	1	1	0	1	0	0	0	0	1	0	0	1	0	0	0	0	0	0	0	0	0	0
507	Female	19	1	0	0	0	0	1	0	1	1	0	0	0	1	1	1	0	0	0	1	0	1	0	0
508	Female	12	1	1	0	0	0	0	0	0	1	0	0	0	0	1	1	1	0	0	1	1	1	0	0
509	Female	15	1	0	1	0	0	0	0	0	1	0	0	0	0	0	0	1	1	0	0	0	0	0	0
510	Female	14	1	0	0	0	0	0	1	0	1	0	0	0	0	0	0	0	0	0	1	1	1	0	0
511	Female	18	1	0	1	0	0	1	0	0	1	0	0	1	0	0	1	0	0	1	1	1	0	0	0
512	Female	15	1	1	0	0	0	1	0	0	1	0	0	0	0	0	1	0	0	1	1	1	0	0	0
513	Female	18	1	0	0	0	0	0	0	0	1	0	0	0	0	0	1	0	0	0	0	1	0	0	0
514	Female	15	1	0	0	0	0	0	0	0	1	0	0	0	0	0	1	0	0	1	0	0	0	0	0
515	Male	14	1	1	1	0	0	0	0	0	0	0	0	0	0	1	1	0	0	0	1	0	0	0	0
516	Female	16	1	1	1	0	1	1	0	0	1	1	1	0	1	1	1	0	0	0	1	0	0	0	1
517	Female	14	1	1	0	0	1	1	0	0	1	0	0	1	0	1	1	0	0	1	1	1	1	0	0
518	Female	17	1	1	0	0	1	0	0	0	1	0	0	0	0	1	1	0	0	0	1	0	0	0	0
519	Male	11	1	0	0	1	1	0	1	0	1	0	0	1	0	0	0	0	0	1	0	0	0	0	0
520	Male	18	1	1	0	0	0	0	1	1	1	0	0	0	1	0	0	0	0	1	0	0	0	0	0
521	Female	17	1	1	0	0	0	0	0	0	1	1	1	0	0	1	1	0	0	0	1	1	1	1	0
522	Male	11	1	0	0	1	1	0	0	0	0	1	0	0	1	0	0	0	0	1	0	0	0	0	0
523	Male	14	1	0	1	0	1	1	0	0	0	0	0	1	0	0	0	0	0	0	0	0	0	1	0
524	Female	18	1	0	1	0	0	0	0	0	1	0	0	0	0	0	0	0	1	0	0	0	0	0	0
525	Male	15	1	0	1	0	0	0	1	0	1	0	0	0	0	0	1	0	0	0	1	0	1	0	0
526	Female	18	1	0	0	0	0	0	0	0	1	0	0	0	0	0	1	0	1	0	0	0	0	0	0
527	Female	19	1	0	0	0	0	1	0	1	1	0	0	0	0	1	1	0	0	1	0	0	0	0	0
528	Female	18	1	0	0	0	0	1	0	1	1	0	1	0	0	1	0	0	0	1	1	0	1	0	0
529	Female	15	1	0	0	0	0	0	1	0	1	0	0	1	0	0	0	1	0	1	0	0	1	1	0
530	Female	18	1	0	1	0	0	0	1	0	1	0	0	0	0	0	0	0	0	0	1	0	0	0	0
531	Female	18	1	1	0	0	0	0	1	0	1	0	0	0	1	1	1	0	0	0	1	1	1	0	0
532	Female	17	1	0	0	0	0	1	0	0	1	0	0	0	1	1	1	0	0	1	1	0	1	0	0
533	Female	15	1	0	1	0	0	1	0	0	1	0	0	0	1	1	1	0	0	0	0	1	0	0	0
534	Female	16	1	0	0	0	0	1	0	0	1	0	0	0	1	1	1	0	0	1	1	1	1	0	0
535	Female	14	1	1	0	0	0	1	1	0	1	0	1	1	0	1	1	0	0	1	1	1	0	0	0
536	Female	15	1	0	0	0	0	0	0	0	1	0	0	1	0	1	1	0	0	0	1	0	1	0	0
537	Female	18	1	0	1	0	0	1	0	0	1	0	0	1	0	1	1	0	0	1	1	1	0	0	0
538	Female	15	1	0	1	0	0	0	0	0	1	0	0	0	0	1	1	0	0	0	1	0	1	0	0
539	Female	15	1	0	0	0	0	1	0	0	1	0	0	0	0	1	1	0	0	1	1	1	0	0	0
540	Female	18	1	0	0	0	0	1	0	0	1	0	0	0	0	1	1	0	0	1	0	0	0	0	0
541	Female	14	1	1	0	0	0	0	0	0	1	0	0	1	1	0	1	0	0	1	1	1	1	0	0
542	Female	19	1	1	0	0	0	1	0	0	1	0	0	1	1	0	1	0	0	1	1	1	1	0	0
543	Female	18	1	0	1	0	0	0	0	0	1	0	0	1	1	0	1	0	0	0	1	0	0	0	0
544	Female	17	1	1	0	0	0	0	0	0	1	0	0	0	1	0	1	0	0	0	1	1	1	0	0
545	Female	15	1	1	0	0	0	0	0	0	1	0	0	0	1	0	1	0	0	0	1	0	0	0	0
546	Female	17	1	1	1	0	0	0	0	0	1	0	0	0	1	0	1	0	0	0	1	0	0	0	0
547	Female	15	1	0	0	0	0	0	0	0	1	0	0	1	0	0	1	0	0	1	1	1	1	0	0
548	Female	18	1	0	1	0	0	0	0	0	1	0	0	1	0	0	1	0	0	0	1	1	1	0	0
549	Female	15	1	0	1	0	0	0	0	0	1	0	0	1	0	0	1	0	0	1	1	1	0	0	0
550	Female	17	1	1	0	0	0	0	0	0	1	1	0	0	0	0	1	0	0	1	0	1	0	0	0
551	Female	14	1	0	0	0	0	0	0	0	1	0	0	0	0	0	1	0	0	0	0	1	0	0	0
552	Female	18	1	1	0	0	0	0	0	0	1	0	0	0	0	0	1	0	0	1	0	1	1	0	0
553	Female	14	1	1	1	0	0	1	0	0	1	0	0	0	0	0	1	0	0	0	1	1	0	0	0
554	Female	18	1	0	0	0	0	0	0	0	1	0	0	0	0	1	1	0	0	0	1	0	0	0	0
555	Female	18	1	0	0	0	0	0	0	0	1	0	0	0	0	0	1	0	0	0	1	0	0	0	0
556	Female	15	1	0	0	0	0	0	0	0	1	0	0	0	0	0	1	0	0	0	0	1	0	0	0
557	Male	17	1	0	0	0	0	0	0	0	1	0	0	0	0	0	1	0	0	1	0	0	0	0	0
558	Female	12	1	1	0	0	0	1	0	0	1	1	1	0	1	1	0	0	0	0	1	0	0	0	0
559	Female	17	1	0	0	0	0	0	0	0	1	0	0	0	0	1	0	0	0	1	1	1	1	0	0
560	Male	14	1	0	0	0	0	0	0	0	1	0	0	0	0	1	0	0	0	0	0	1	0	0	0
561	Female	19	1	0	0	0	0	0	0	0	1	0	0	0	0	1	0	0	0	1	0	0	0	0	0
562	Female	19	1	0	0	0	0	0	0	0	1	0	0	1	0	0	0	0	0	0	1	1	0	0	0
563	Female	17	1	1	1	0	0	1	0	0	1	0	0	1	0	0	0	0	0	1	1	0	0	0	0
564	Female	17	1	0	0	0	0	0	0	0	1	0	0	1	0	0	0	0	0	0	1	0	0	0	0
565	Female	15	1	0	0	0	0	0	0	0	1	0	0	1	0	0	0	0	0	0	1	0	0	0	0
566	Female	17	1	0	0	0	0	0	0	0	1	0	0	1	0	0	0	0	0	0	0	1	0	0	0
567	Female	17	1	0	0	0	0	0	0	0	1	0	0	1	0	0	0	0	0	1	0	0	0	0	0
568	Female	17	1	0	0	0	0	1	0	0	1	0	0	1	0	0	0	0	0	1	1	0	0	0	0
569	Female	18	1	1	1	0	0	1	1	1	0	0	0	1	0	0	1	0	0	0	1	1	1	0	0
570	Female	18	1	1	1	0	0	1	0	0	0	1	0	0	0	1	1	0	0	1	1	0	0	0	0
571	Female	19	1	1	1	0	0	1	0	0	0	0	0	0	0	1	1	0	0	0	0	1	1	0	0
572	Male	15	1	0	1	0	0	0	0	0	0	1	0	0	1	0	1	0	1	0	0	0	0	0	0
573	Female	19	1	1	1	0	0	1	0	0	0	0	0	0	0	0	1	0	0	1	1	1	1	0	0
574	Male	15	1	1	0	0	0	0	0	0	0	0	0	0	0	0	1	0	0	1	1	0	0	0	0
575	Female	14	1	1	0	0	0	0	0	0	0	0	0	0	0	0	1	0	0	0	1	0	0	0	0
576	Female	18	1	0	0	0	0	1	0	0	0	0	0	0	0	0	1	0	0	0	0	1	0	0	0
577	Female	17	1	1	1	0	0	0	0	0	0	0	0	0	0	0	1	0	0	1	0	0	0	0	0
578	Female	16	1	0	0	0	0	1	0	0	0	1	0	0	0	0	1	0	0	0	1	0	0	0	0
579	Female	18	1	0	0	0	0	1	0	0	0	0	0	1	1	0	0	0	0	0	1	1	1	0	0
580	Female	18	1	0	1	0	0	1	0	0	0	1	0	0	1	0	0	0	1	0	0	0	0	0	0
581	Female	17	1	1	0	0	0	0	0	0	0	0	0	0	1	0	0	0	0	0	1	0	0	0	0
582	Female	12	1	0	0	0	0	1	0	0	0	0	1	1	0	0	0	0	1	0	0	0	0	0	0
583	Female	19	1	0	0	0	0	0	1	0	0	0	0	0	0	1	0	0	0	0	0	1	1	0	0
584	Female	18	1	0	0	0	1	1	0	1	1	0	0	0	0	1	1	0	0	0	1	1	0	0	0
585	Female	17	1	0	0	0	0	0	0	1	1	0	1	1	1	1	0	0	0	1	0	1	1	0	0
586	Female	13	1	1	1	0	0	1	0	0	1	1	0	0	1	1	1	0	0	1	1	1	0	0	0
587	Female	19	1	0	1	0	1	0	0	0	1	0	0	1	0	0	1	0	1	0	0	0	0	0	0
588	Female	19	1	1	1	0	1	1	1	0	1	0	0	1	0	0	1	0	0	0	1	0	1	0	0
589	Female	17	1	1	1	0	1	1	0	0	1	0	0	1	0	0	1	0	0	0	1	1	0	0	0
590	Female	17	1	0	0	0	0	1	0	0	1	1	0	1	0	0	1	0	0	1	1	0	1	0	0
591	Female	14	1	0	0	0	1	1	0	0	1	0	0	0	0	0	1	0	0	1	1	1	0	0	0
592	Female	17	1	1	0	0	1	1	0	0	1	0	0	0	0	0	1	0	0	1	0	0	0	0	0
593	Female	14	1	0	1	0	0	0	0	0	1	0	0	0	0	0	1	0	0	1	0	0	0	0	0
594	Female	13	1	0	0	0	1	0	0	0	1	0	0	0	0	0	1	0	0	0	0	0	0	0	0
595	Female	11	1	1	1	1	1	1	1	0	1	0	0	0	0	0	1	0	1	0	0	0	0	0	0
596	Female	17	1	0	0	1	1	0	0	0	1	0	0	1	1	0	0	0	0	1	0	0	0	0	0
597	Female	19	1	1	0	0	1	1	0	0	1	1	1	0	1	0	0	0	0	0	1	0	0	0	0
598	Female	16	1	0	1	0	1	0	0	0	1	1	1	0	0	0	0	0	0	0	1	0	0	0	0
599	Female	15	1	0	0	1	0	0	0	0	0	1	0	0	1	0	0	1	0	0	0	1	0	0	0
600	Male	17	1	0	0	1	0	1	1	0	0	0	0	1	1	1	1	0	0	0	0	0	0	0	1
601	Male	18	1	0	0	1	1	0	0	0	0	0	0	0	0	0	1	0	0	0	0	0	1	0	0
602	Female	14	1	1	1	0	1	0	0	0	0	0	0	0	0	1	0	0	0	0	0	0	0	0	0
603	Female	15	1	0	0	0	1	1	0	0	0	0	0	0	1	0	0	0	0	0	0	0	0	0	0
604	Female	18	1	0	1	1	0	0	0	0	0	0	0	1	0	0	0	0	0	1	1	0	0	0	0
605	Female	15	1	1	0	0	1	0	0	0	0	0	0	1	0	0	0	0	0	1	0	1	0	0	0
606	Female	14	1	0	1	0	1	1	0	0	0	0	0	1	0	0	0	0	0	0	0	0	0	0	0
607	Female	17	1	0	0	0	1	1	0	0	0	1	0	1	0	0	0	0	0	1	1	0	1	0	0
608	Female	16	1	0	0	0	1	1	0	0	0	1	0	1	0	0	0	0	0	0	0	0	1	0	0
609	Female	17	1	0	0	0	1	1	0	0	0	1	0	1	0	0	0	0	0	0	1	1	0	0	0
610	Female	16	1	0	0	0	1	1	0	0	0	1	0	1	0	0	0	0	0	0	1	0	0	0	0
611	Female	16	1	0	0	0	1	1	0	0	0	1	0	1	0	0	0	0	0	0	1	0	0	0	0
612	Female	13	1	0	0	0	1	1	0	0	0	1	0	1	0	0	0	0	0	0	1	0	0	0	0
613	Male	15	1	0	0	0	0	0	0	1	0	0	0	0	1	0	0	0	0	0	1	0	0	0	0
614	Female	17	1	1	0	0	0	0	0	1	0	0	0	0	0	0	1	0	0	1	1	0	0	1	0
615	Male	16	1	0	0	0	0	1	0	0	0	0	0	0	0	0	0	0	0	1	0	1	0	0	0
616	Female	19	1	1	1	0	0	0	0	0	0	0	0	0	1	1	1	0	0	1	1	1	1	0	0
617	Male	14	1	1	1	0	0	1	0	0	0	0	0	0	0	1	1	0	0	0	1	0	1	0	0
618	Male	15	1	0	1	0	0	1	0	0	0	1	1	0	1	1	1	0	0	1	1	1	0	1	0
619	Male	16	1	1	1	0	1	0	0	0	0	0	0	0	0	0	0	1	0	0	1	0	0	1	0
620	Female	14	1	0	0	0	0	0	0	0	1	0	0	0	0	0	0	0	0	0	1	1	0	0	0
621	Female	17	1	1	0	0	0	1	0	0	1	0	0	0	0	1	1	0	0	1	1	1	0	0	0
622	Female	14	1	1	1	0	0	0	0	0	1	0	0	0	0	0	1	0	0	1	1	1	1	0	1
623	Female	14	1	0	0	0	0	0	0	0	1	0	0	0	0	0	1	0	0	1	1	1	0	0	0
624	Female	18	1	1	0	0	0	0	0	1	1	0	0	1	0	0	1	0	0	1	1	0	0	0	0
625	Female	18	1	1	1	0	0	1	0	0	1	0	0	0	0	1	1	1	0	1	1	0	1	0	0
626	Male	14	1	1	0	0	0	1	0	0	1	0	0	0	0	0	0	1	0	1	1	1	0	0	0
627	Female	18	1	0	0	0	0	0	0	0	1	0	0	0	0	1	1	0	0	1	0	0	0	0	0
628	Female	14	1	1	1	0	0	0	1	0	1	1	1	0	0	0	1	0	0	1	1	0	1	0	0
629	Female	12	1	1	0	0	0	1	0	1	0	0	0	0	1	1	1	0	0	1	1	0	0	0	0
630	Female	17	1	0	0	0	0	1	0	0	0	0	0	0	0	0	0	1	0	0	0	1	0	0	0
631	Female	14	1	1	0	0	0	0	0	0	0	0	0	0	0	0	0	0	0	1	1	0	1	0	0
632	Female	13	1	1	0	0	0	0	0	0	0	0	0	0	0	0	0	0	0	0	1	0	0	0	0
633	Male	14	1	0	0	0	0	1	0	0	0	0	0	0	0	0	0	0	0	0	1	0	0	0	0
634	Male	10	1	1	0	0	0	0	0	0	0	0	0	0	0	0	0	0	1	0	0	0	0	0	0
635	Female	15	1	1	1	0	0	0	0	0	0	0	0	0	1	1	1	0	0	1	1	1	0	0	0
636	Female	17	1	1	0	0	0	0	1	0	0	0	0	0	1	1	1	0	0	0	1	0	0	0	0
637	Female	12	1	1	0	0	0	0	0	0	0	1	0	0	0	1	1	0	0	1	1	0	0	0	0
638	Male	12	1	1	0	0	0	0	0	0	0	0	0	0	0	1	1	0	0	0	1	0	0	0	0
639	Female	18	1	1	0	0	0	1	1	0	0	0	0	0	0	1	1	0	0	0	1	1	0	0	0
640	Female	18	1	0	0	0	0	0	0	0	0	0	0	0	0	1	1	0	0	0	1	0	0	0	0
641	Female	11	1	1	0	0	0	0	0	0	0	0	0	0	0	1	1	0	0	0	0	1	0	0	0
642	Male	14	1	1	0	0	0	1	0	0	0	0	0	0	0	0	1	0	0	1	1	0	1	0	0
643	Male	17	1	1	0	0	0	0	0	0	0	0	0	0	0	0	1	0	0	0	1	1	0	0	0
644	Female	18	1	1	1	0	0	0	0	0	0	0	0	0	0	0	1	0	0	0	1	0	0	0	0
645	Male	14	1	1	1	0	0	1	0	0	0	0	0	0	0	0	1	0	0	0	1	0	0	0	0
646	Male	19	1	0	0	0	0	0	0	0	0	0	0	0	0	0	1	0	0	1	0	0	0	0	0
647	Male	14	1	0	0	0	0	1	0	0	0	0	0	0	0	0	1	0	1	0	0	0	0	0	0
648	Male	18	1	1	0	0	0	0	0	0	0	0	0	0	0	0	1	0	0	1	1	1	1	0	0
649	Female	18	1	0	0	0	0	0	0	0	0	0	0	0	0	0	1	0	0	1	1	1	1	0	0
650	Female	17	1	0	0	0	0	1	0	0	0	0	0	0	0	0	1	0	0	0	1	1	1	0	0
651	Male	15	1	0	0	0	0	1	0	0	0	0	0	0	0	0	1	0	0	0	1	0	1	0	0
652	Female	14	1	1	0	0	0	0	0	0	0	0	0	0	0	0	1	0	0	0	1	0	0	0	0
653	Male	16	1	0	0	0	0	0	0	0	0	0	0	0	0	0	1	0	0	0	1	0	0	0	0
654	Male	17	1	0	0	1	0	0	0	0	0	0	0	0	0	0	1	0	0	1	0	0	0	0	0
655	Female	18	1	1	0	0	0	1	0	0	0	0	0	0	1	1	0	0	0	1	1	1	0	0	0
656	Female	18	1	1	0	0	0	1	0	0	0	0	0	0	0	1	0	0	0	1	1	0	0	0	0
657	Male	15	1	0	0	0	0	0	0	0	0	0	0	1	0	0	0	0	0	0	1	0	0	0	0
658	Male	14	1	0	0	0	0	0	0	0	1	0	0	0	0	0	1	1	0	1	1	1	1	0	0
659	Female	11	1	0	1	0	0	0	0	0	1	1	0	0	0	0	0	1	0	0	0	1	0	0	0
660	Female	15	1	1	0	0	0	0	0	0	1	0	0	0	0	0	0	0	0	0	1	1	0	0	0
661	Female	13	1	0	0	0	0	0	0	0	1	0	0	0	0	0	0	0	0	0	1	0	0	0	0
662	Male	17	1	0	0	0	0	0	0	0	1	0	0	0	0	0	0	0	0	1	1	1	1	0	0
663	Male	18	1	0	1	0	0	0	0	0	1	0	0	0	0	0	0	0	0	0	1	1	1	0	0
664	Female	18	1	0	0	0	0	0	0	0	1	0	0	0	0	0	0	0	0	1	1	1	0	0	0
665	Male	17	1	0	0	0	0	0	0	0	1	0	0	0	0	0	0	0	0	1	0	0	0	0	0
666	Male	18	1	0	0	0	0	0	0	0	1	1	0	0	0	1	1	0	0	1	0	1	0	0	0
667	Male	17	1	0	1	0	0	0	0	0	1	0	0	0	0	1	1	0	0	1	1	1	1	0	0
668	Female	18	1	1	0	0	0	0	0	0	1	0	0	0	0	1	1	0	0	1	1	0	0	0	0
669	Male	18	1	0	1	0	0	0	0	0	1	0	0	0	0	1	1	0	0	1	1	0	0	0	0
670	Male	17	1	0	0	0	0	0	0	0	1	0	0	0	0	1	1	0	0	1	0	0	0	0	0
671	Male	19	1	0	0	0	0	0	0	0	1	0	0	0	0	1	1	0	1	0	0	0	0	0	0
672	Female	13	1	0	0	0	0	0	0	0	1	0	0	0	1	0	1	0	0	0	1	1	0	0	0
673	Male	15	1	0	0	0	0	0	0	0	1	0	0	0	1	0	1	0	0	1	0	1	0	0	0
674	Male	18	1	0	0	0	0	0	0	0	1	0	0	0	1	0	1	0	0	1	1	1	1	0	0
675	Male	15	1	0	0	0	0	0	0	0	1	1	0	1	0	0	1	0	0	0	1	0	0	0	0
676	Female	14	1	0	0	0	0	0	0	0	1	0	0	1	0	0	1	0	0	0	1	0	0	0	0
677	Male	17	1	0	1	0	0	0	0	0	1	0	0	0	0	0	1	0	0	0	0	1	0	1	0
678	Female	15	1	1	0	0	0	1	0	0	1	0	0	0	0	0	1	0	0	0	1	1	1	0	0
679	Male	13	1	1	0	0	0	0	0	0	1	0	0	0	0	0	1	0	0	1	1	1	0	0	0
680	Male	17	1	0	0	0	0	0	0	0	1	0	0	0	0	0	1	0	0	1	1	0	0	0	0
681	Female	13	1	0	0	0	0	0	0	0	1	0	0	0	0	0	1	0	0	0	1	0	0	0	0
682	Female	18	1	0	0	0	0	0	0	0	1	0	0	0	0	0	1	0	0	1	0	1	0	0	0
683	Male	15	1	0	0	0	0	0	0	0	1	0	0	0	0	0	1	0	0	1	0	0	0	0	0
684	Male	15	1	0	0	0	0	0	0	0	1	0	0	0	0	0	1	0	0	1	0	0	0	0	0
685	Male	18	1	0	0	0	0	0	0	0	1	0	0	0	0	0	1	0	1	0	0	0	0	0	0
686	Male	19	1	0	0	0	0	0	0	0	1	0	0	0	0	0	1	0	1	0	0	0	0	0	0
687	Female	14	1	0	0	0	0	0	0	0	1	1	0	0	0	1	0	0	0	0	0	1	0	0	0
688	Female	13	1	0	0	0	0	0	0	0	1	1	0	0	0	1	0	0	0	1	0	0	0	0	0
689	Female	12	1	1	1	0	0	1	0	0	1	0	0	0	0	1	0	0	0	1	1	1	0	0	0
690	Male	13	1	0	0	0	0	0	0	0	1	0	0	0	0	1	0	0	0	1	0	0	0	0	0
691	Male	18	1	0	0	0	0	0	0	0	1	0	0	0	0	1	0	0	0	1	0	0	0	0	0
692	Female	10	1	0	0	0	0	0	0	0	1	0	0	0	0	1	0	0	1	0	0	0	0	0	0
693	Female	12	1	0	1	0	0	0	0	0	1	0	0	1	0	0	0	0	0	0	1	1	1	0	0
694	Male	17	1	0	0	0	0	0	0	0	1	0	0	1	0	0	0	0	0	1	0	1	0	0	0
695	Female	18	1	0	0	0	0	0	0	0	1	0	0	0	0	1	0	0	0	1	0	0	0	0	0
696	Female	16	1	0	0	0	0	1	0	1	1	0	0	0	0	1	1	0	0	1	1	1	0	0	0
697	Female	17	1	0	0	0	0	0	1	1	1	0	0	0	0	0	1	0	0	1	1	0	1	0	0
698	Female	17	1	0	0	0	0	0	0	1	1	0	0	0	0	0	1	0	0	0	1	1	0	0	0
699	Female	19	1	0	0	0	0	1	0	0	1	0	0	0	0	0	0	1	0	1	1	1	0	0	0
700	Female	19	1	1	0	0	0	0	0	0	1	0	0	0	0	0	0	0	0	0	1	1	1	0	0
701	Female	17	1	1	0	0	0	1	1	0	1	0	0	0	0	1	1	0	0	1	1	1	0	0	1
702	Female	18	1	0	0	0	0	1	0	0	1	0	0	0	0	1	1	0	0	1	0	1	1	0	0
703	Female	19	1	0	0	0	0	1	0	0	1	0	0	1	0	0	1	0	0	1	0	1	1	0	0
704	Female	16	1	0	0	0	0	0	0	0	1	0	0	1	0	0	1	0	0	0	1	0	0	0	0
705	Female	19	1	0	0	0	0	0	0	0	1	0	0	0	0	0	1	0	0	1	1	1	0	0	0
706	Female	18	1	1	0	0	0	0	0	0	1	0	0	0	0	0	1	0	0	0	1	0	0	0	0
707	Female	18	1	0	0	0	0	0	0	0	1	0	0	0	0	0	1	0	0	1	1	1	1	0	0
708	Male	18	1	0	0	0	0	1	0	0	1	0	0	0	0	0	1	0	0	1	1	0	0	0	0
709	Female	18	1	1	0	0	0	1	0	0	1	0	0	0	0	0	1	0	0	1	1	0	0	0	0
710	Male	17	1	0	0	0	0	0	0	0	1	0	0	0	1	1	0	0	0	1	0	0	1	0	0
711	Female	14	1	0	1	0	0	0	0	0	1	0	0	0	1	0	0	0	1	0	0	0	0	0	0
712	Female	17	1	0	0	0	0	0	0	1	0	0	0	0	0	0	0	0	0	1	0	1	0	0	0
713	Male	14	1	1	0	0	0	1	0	1	0	0	0	0	1	1	1	0	0	0	1	0	1	0	0
714	Female	15	1	1	0	0	0	0	0	1	0	0	0	0	1	1	1	0	0	0	1	1	1	0	0
715	Male	18	1	0	0	0	0	1	0	1	0	0	0	0	1	1	1	0	0	1	0	0	0	0	0
716	Female	13	1	1	0	0	0	1	0	1	0	0	0	1	0	1	1	0	0	0	1	0	1	1	0
717	Male	18	1	1	0	0	0	0	0	1	0	0	1	0	0	1	1	0	0	1	1	0	0	0	0
718	Male	10	1	0	0	0	0	0	0	1	0	0	0	0	0	1	1	0	0	1	1	0	0	0	0
719	Female	14	1	0	1	0	0	1	0	1	0	0	0	0	0	1	1	0	0	1	0	1	0	0	0
720	Male	17	1	1	0	0	0	0	0	1	0	0	0	0	0	1	1	0	0	0	0	0	0	0	1
721	Male	11	1	0	0	0	0	0	0	1	0	0	0	0	0	1	1	0	0	1	1	0	0	1	0
722	Male	19	1	0	0	0	0	0	0	1	0	0	0	0	0	1	1	0	0	0	1	0	0	1	0
723	Male	17	1	0	0	0	0	1	0	1	0	0	0	0	0	1	1	0	0	1	0	1	0	0	0
724	Female	18	1	0	0	0	0	0	1	1	0	0	0	1	0	0	1	0	1	0	0	0	0	0	0
725	Male	17	1	0	0	0	0	0	0	1	0	0	0	0	0	0	1	0	1	0	0	0	0	0	0
726	Female	14	1	1	1	0	0	0	0	1	0	0	0	0	0	0	1	0	0	0	1	0	1	0	0
727	Male	17	1	1	0	0	0	0	0	1	0	0	0	0	0	0	1	0	0	0	1	0	1	0	0
728	Female	17	1	0	0	0	0	0	0	1	0	0	0	0	0	0	1	0	0	0	1	1	0	0	0
729	Female	18	1	1	0	0	0	1	0	1	0	0	0	0	0	0	1	0	0	1	1	0	0	0	0
730	Male	17	1	1	0	0	0	0	1	1	0	0	0	0	0	0	1	0	0	1	1	0	0	0	0
731	Male	14	1	0	0	0	0	0	0	1	0	0	0	0	0	0	1	0	0	1	1	0	0	0	0
732	Female	17	1	0	0	0	0	0	0	1	0	0	0	0	0	0	1	0	0	0	1	0	0	0	0
733	Male	17	1	0	0	0	0	0	0	1	0	0	0	0	0	0	1	0	0	0	1	0	0	0	0
734	Female	19	1	0	0	0	0	0	0	1	0	0	0	0	0	0	1	0	0	0	0	0	0	0	0
735	Male	18	1	0	0	0	0	0	0	1	0	0	0	0	0	0	1	0	1	0	0	0	0	0	0
736	Male	14	1	0	0	0	0	0	0	1	0	0	0	0	0	0	1	0	1	0	0	0	0	0	0
737	Male	12	1	0	0	0	0	0	0	1	0	0	0	0	0	1	0	0	0	1	0	0	1	0	0
738	Male	17	1	0	0	0	0	0	0	1	0	0	0	0	0	1	0	0	0	1	0	0	1	0	0
739	Male	18	1	0	0	0	0	0	0	1	0	0	0	0	0	1	0	0	0	1	0	0	0	0	0
740	Female	15	1	1	0	0	0	0	0	1	0	1	0	0	1	0	0	0	0	0	1	1	1	0	0
741	Female	14	1	0	0	0	0	0	0	1	0	0	0	1	0	0	0	0	0	0	0	0	0	0	0
742	Male	13	1	0	0	0	0	0	0	0	0	1	0	0	0	0	0	1	0	1	1	1	0	0	0
743	Female	17	1	0	0	0	0	1	0	0	0	0	0	0	0	1	1	1	0	0	1	0	0	0	0
744	Male	14	1	1	0	0	0	0	0	0	0	0	0	0	0	1	1	1	0	1	0	0	0	0	0
745	Male	18	1	0	0	1	0	0	0	0	0	0	0	0	1	1	0	1	0	1	1	1	1	0	0
746	Female	14	1	0	1	0	0	1	0	0	0	1	0	0	0	1	0	1	0	0	1	0	1	0	0
747	Male	17	1	0	0	0	0	1	0	0	0	0	0	0	0	1	0	1	0	1	1	1	1	0	0
748	Female	15	1	1	1	0	0	0	0	0	0	0	0	0	0	0	0	1	0	1	1	1	1	0	0
749	Male	19	1	0	0	0	0	1	0	0	0	0	0	0	0	0	0	1	0	1	1	1	1	0	0
750	Male	12	1	1	0	0	0	0	0	0	0	0	0	0	0	0	0	1	0	1	1	0	1	0	0
751	Male	18	1	1	0	0	0	0	0	0	0	0	0	0	0	0	0	1	0	0	1	0	1	0	0
752	Male	17	1	0	0	0	0	1	0	0	0	0	0	0	0	0	0	1	0	0	0	1	0	0	0
753	Male	16	1	1	0	0	0	0	0	0	0	0	0	0	0	0	1	0	0	1	0	1	1	0	0
754	Male	18	1	1	1	0	0	0	0	0	0	0	0	0	0	0	1	0	0	0	1	0	0	0	0
755	Male	17	1	0	0	0	0	1	0	0	0	1	0	0	0	0	0	0	0	1	1	1	1	0	0
756	Male	15	1	0	0	0	0	0	0	0	0	0	0	0	0	0	0	0	0	1	1	0	1	0	0
757	Female	15	1	0	1	1	0	0	0	0	0	0	0	0	0	0	0	0	0	1	1	1	1	1	0
758	Male	12	1	0	0	0	0	1	0	0	0	0	0	0	0	0	0	0	0	1	1	1	1	0	0
759	Male	19	1	0	1	0	0	1	0	0	0	0	0	0	0	0	0	0	0	1	1	1	1	0	0
760	Female	18	1	0	0	0	0	1	0	0	0	0	0	0	0	0	0	0	0	0	1	1	1	0	0
761	Female	14	1	1	1	0	0	0	0	0	0	0	0	0	0	0	0	0	0	0	1	0	1	0	0
762	Female	19	1	1	0	0	0	0	0	0	0	0	0	0	0	0	0	0	0	0	1	0	1	0	0
763	Male	17	1	0	1	0	0	1	0	0	0	0	0	0	0	0	0	0	0	0	1	0	1	0	0
764	Male	16	1	0	1	0	0	0	0	0	0	0	0	0	0	0	0	0	0	1	0	1	1	0	0
765	Male	14	1	1	0	0	0	0	0	0	0	0	0	0	0	0	0	0	0	0	0	0	1	0	0
766	Male	16	1	0	0	0	0	1	0	0	0	0	0	0	0	0	0	0	0	0	0	0	1	0	0
767	Female	17	1	1	0	0	0	0	0	0	0	0	0	0	0	0	0	0	0	1	1	1	0	0	0
768	Female	18	1	0	0	0	0	0	0	0	0	0	0	0	0	0	0	0	0	0	1	1	0	0	0
769	Female	17	1	0	1	0	0	1	0	0	0	0	0	0	0	0	0	0	0	0	1	1	0	0	0
770	Female	18	1	1	1	0	0	0	0	0	0	0	0	0	0	0	0	0	0	0	1	1	0	0	0
771	Female	17	1	1	1	0	0	0	0	0	0	0	0	0	0	0	0	0	0	1	1	0	0	0	0
772	Male	18	1	0	0	0	0	0	0	0	0	0	0	0	0	0	0	0	0	0	1	0	0	0	0
773	Male	18	1	1	0	0	0	0	1	0	0	0	0	0	0	0	0	0	0	0	1	0	0	0	0
774	Male	18	1	1	0	1	0	0	0	0	0	0	0	0	0	0	0	0	0	0	1	0	0	0	0
775	Male	18	1	0	0	0	0	1	0	0	0	0	0	0	0	0	0	0	0	1	0	1	0	0	0
776	Male	16	1	0	0	0	0	1	0	0	0	0	0	0	0	0	0	0	0	1	0	1	0	0	0
777	Female	18	1	0	0	0	0	0	0	0	0	0	0	0	0	0	0	0	0	1	0	1	0	0	0
778	Male	17	1	0	0	0	0	1	0	0	0	0	0	0	0	0	0	0	0	1	0	1	0	0	0
779	Male	17	1	0	0	0	0	0	0	0	0	0	0	0	0	0	0	0	0	0	0	1	0	0	0
780	Male	17	1	1	0	0	0	0	0	0	0	0	0	0	0	0	0	0	0	0	0	1	0	0	0
781	Male	14	1	1	0	0	0	0	1	0	0	0	0	0	0	0	0	0	0	1	0	0	0	0	0
782	Male	18	1	1	0	0	0	0	0	0	0	0	0	0	0	0	0	0	0	1	0	0	0	0	0
783	Male	18	1	1	0	0	0	0	0	0	0	0	0	0	0	0	0	0	0	1	0	0	0	0	0
784	Male	18	1	0	0	0	0	1	0	0	0	0	0	0	0	0	0	0	0	1	0	0	0	0	0
785	Female	14	1	0	0	0	0	1	0	0	0	0	0	0	0	0	0	0	0	1	0	0	0	0	0
786	Female	15	1	0	0	0	0	1	0	0	0	0	0	0	0	0	0	0	0	0	0	0	0	0	0
787	Female	14	1	1	0	0	0	0	0	0	0	0	0	0	0	0	0	0	1	0	0	0	0	0	0
788	Male	15	1	0	0	0	0	1	0	0	0	0	0	0	0	0	0	0	1	0	0	0	0	0	0
789	Male	16	1	1	0	0	0	1	0	0	0	1	1	0	1	1	1	0	0	1	1	1	1	0	0
790	Female	16	1	1	1	0	0	0	0	0	0	1	0	0	1	1	1	0	0	0	1	0	0	0	0
791	Female	16	1	0	0	0	0	1	0	0	0	0	0	0	1	1	1	0	0	1	0	1	1	0	0
792	Male	18	1	0	0	0	0	0	0	0	0	0	0	0	1	1	1	0	0	0	0	0	1	0	0
793	Male	14	1	1	0	1	0	0	0	0	0	0	0	0	1	1	1	0	0	1	0	0	0	0	0
794	Male	18	1	0	0	0	0	1	0	0	0	0	0	0	1	1	1	0	0	1	1	1	1	0	0
795	Male	19	1	1	0	0	0	0	0	0	0	0	0	0	1	1	1	0	0	1	1	1	1	0	0
796	Female	19	1	1	0	0	0	1	0	0	0	0	0	0	1	1	1	0	0	1	1	0	1	0	0
797	Female	14	1	1	1	0	0	0	0	0	0	0	0	0	1	1	1	0	0	1	1	1	0	0	0
798	Male	17	1	1	1	0	0	1	0	0	0	0	0	0	1	1	1	0	0	0	1	1	0	0	0
799	Male	17	1	0	0	0	0	0	1	0	0	0	0	0	1	1	1	0	0	1	0	1	0	0	0
800	Male	17	1	1	0	0	0	0	0	0	0	0	0	1	0	1	1	0	0	1	0	0	0	0	0
801	Female	17	1	1	1	0	0	1	0	0	0	1	1	0	0	1	1	0	0	0	1	0	0	0	0
802	Female	12	1	0	0	0	0	1	0	0	0	1	0	0	0	1	1	0	0	1	1	1	1	0	0
803	Female	19	1	0	0	0	0	1	0	0	0	1	0	0	0	1	1	0	0	1	1	0	1	0	0
804	Female	16	1	0	0	1	0	0	0	0	0	1	0	0	0	1	1	0	0	1	1	1	0	0	0
805	Female	17	1	1	1	0	0	0	0	0	0	0	0	0	0	1	1	0	0	1	1	1	1	0	0
806	Female	16	1	1	1	0	0	0	0	0	0	0	0	0	0	1	1	0	0	1	1	0	1	0	0
807	Female	19	1	1	1	0	0	0	0	0	0	0	0	0	0	1	1	0	0	1	1	1	0	0	0
808	Female	17	1	1	0	0	0	1	0	0	0	0	0	0	0	1	1	0	0	1	1	0	0	0	0
809	Female	18	1	1	0	1	0	0	0	0	0	0	0	0	0	1	1	0	0	1	1	0	0	0	0
810	Female	16	1	1	0	1	0	1	0	0	0	0	0	0	0	1	1	0	0	0	1	0	0	0	0
811	Male	14	1	0	0	0	0	1	0	0	0	0	0	0	0	1	1	0	0	0	1	0	1	0	1
812	Female	12	1	1	0	0	0	1	0	0	0	0	0	0	0	1	1	0	0	0	0	1	0	1	0
813	Male	17	1	1	0	0	0	0	0	0	0	0	0	0	0	1	1	0	0	1	1	1	1	0	0
814	Male	18	1	1	0	0	0	0	0	0	0	0	0	0	0	1	1	0	0	1	1	1	1	0	0
815	Female	18	1	0	0	0	0	1	0	0	0	0	0	0	0	1	1	0	0	1	1	1	1	0	0
816	Female	17	1	0	0	0	0	0	0	0	0	0	0	0	0	1	1	0	0	1	1	0	1	0	0
817	Female	17	1	1	0	0	0	1	0	0	0	0	0	0	0	1	1	0	0	1	1	0	1	0	0
818	Male	17	1	1	0	0	0	0	0	0	0	0	0	0	0	1	1	0	0	0	1	0	1	0	0
819	Female	12	1	0	0	0	0	1	0	0	0	0	0	0	0	1	1	0	0	1	0	1	1	0	0
820	Male	17	1	0	0	0	0	0	0	0	0	0	0	0	0	1	1	0	0	1	0	0	1	0	0
821	Female	17	1	1	0	0	0	1	0	0	0	0	0	0	0	1	1	0	0	1	1	1	0	0	0
822	Female	14	1	0	0	0	0	1	0	0	0	0	0	0	0	1	1	0	0	1	1	1	0	0	0
823	Female	17	1	1	1	0	0	0	0	0	0	0	0	0	0	1	1	0	0	1	1	1	0	0	0
824	Male	14	1	0	0	0	0	1	0	0	0	0	0	0	0	1	1	0	0	1	1	1	0	0	0
825	Male	16	1	1	0	0	0	1	0	0	0	0	0	0	0	1	1	0	0	1	1	1	0	0	0
826	Male	17	1	0	1	0	0	0	0	0	0	0	0	0	0	1	1	0	0	1	1	1	0	0	0
827	Female	17	1	1	0	0	0	0	0	0	0	0	0	0	0	1	1	0	0	1	1	1	0	0	0
828	Male	17	1	1	1	1	0	0	0	0	0	0	0	0	0	1	1	0	0	1	1	1	0	0	0
829	Female	14	1	1	0	0	0	1	0	0	0	0	0	0	0	1	1	0	0	0	1	1	0	0	0
830	Male	17	1	0	0	0	0	1	0	0	0	0	0	0	0	1	1	0	0	0	1	1	0	0	0
831	Female	17	1	0	0	0	0	1	0	0	0	0	0	0	0	1	1	0	0	1	1	0	0	0	0
832	Male	17	1	0	1	1	0	0	0	0	0	0	0	0	0	1	1	0	0	1	1	0	0	0	0
833	Female	18	1	0	0	0	0	1	0	0	0	0	0	0	0	1	1	0	0	1	1	0	0	0	0
834	Male	17	1	0	0	0	0	0	1	0	0	0	0	0	0	1	1	0	0	0	1	0	0	0	0
835	Female	14	1	1	1	1	0	0	0	0	0	0	0	0	0	1	1	0	0	0	1	0	0	0	0
836	Female	11	1	1	1	0	0	0	0	0	0	0	0	0	0	1	1	0	0	0	1	0	0	0	0
837	Female	19	1	0	0	0	0	1	0	0	0	0	0	0	0	1	1	0	0	0	1	0	0	0	0
838	Female	18	1	0	0	0	0	1	0	0	0	0	0	0	0	1	1	0	0	1	0	1	0	0	0
839	Male	19	1	0	0	0	0	1	0	0	0	0	0	0	0	1	1	0	0	1	0	1	0	0	0
840	Female	18	1	0	0	0	0	1	0	0	0	0	0	0	0	1	1	0	0	1	0	1	0	0	0
841	Male	18	1	1	0	0	0	1	0	0	0	0	0	0	0	1	1	0	0	1	0	1	0	0	0
842	Male	18	1	0	0	0	0	1	1	0	0	0	0	0	0	1	1	0	0	1	0	1	0	0	0
843	Male	18	1	0	0	0	0	0	0	0	0	0	0	0	0	1	1	0	0	1	0	1	0	0	0
844	Male	17	1	0	0	0	0	1	0	0	0	0	0	0	0	1	1	0	0	1	0	1	0	0	0
845	Male	19	1	1	0	0	0	0	0	0	0	0	0	0	0	1	1	0	0	0	0	1	0	0	0
846	Male	16	1	0	0	0	0	1	0	0	0	0	0	0	0	1	1	0	0	1	0	0	0	0	0
847	Male	18	1	1	0	0	0	0	0	0	0	0	0	0	0	1	1	0	0	1	0	0	0	0	0
848	Female	17	1	1	0	0	0	0	0	0	0	0	0	0	0	1	1	0	0	1	0	0	0	0	0
849	Male	18	1	1	0	0	0	0	0	0	0	0	0	0	0	1	1	0	0	1	0	0	0	0	0
850	Male	17	1	0	0	0	0	1	0	0	0	0	0	0	0	1	1	0	0	0	0	0	0	0	0
851	Male	13	1	0	0	1	0	0	0	0	0	0	0	0	0	1	1	0	1	0	0	0	0	0	0
852	Male	16	1	0	0	0	0	1	0	0	0	0	0	0	0	1	1	0	0	1	1	1	1	0	0
853	Female	17	1	1	1	0	0	0	0	0	0	0	0	0	1	0	1	0	0	1	1	1	0	0	0
854	Female	14	1	1	0	0	0	0	0	0	0	0	0	0	1	0	1	0	0	0	1	0	1	0	0
855	Male	18	1	0	0	0	0	0	1	0	0	0	0	0	1	0	1	0	0	0	1	0	0	0	0
856	Male	17	1	0	0	1	0	0	0	0	0	0	0	0	1	0	1	0	0	1	1	1	0	0	0
857	Female	18	1	1	0	0	0	1	0	0	0	0	0	0	1	0	1	0	0	0	1	1	0	0	0
858	Male	16	1	1	1	0	0	0	0	0	0	0	0	0	1	0	1	0	0	1	1	0	0	0	0
859	Female	19	1	0	0	0	0	0	0	0	0	0	0	0	1	0	1	0	0	1	0	1	0	0	0
860	Female	17	1	0	0	0	0	1	0	0	0	0	0	1	0	0	1	0	0	0	1	0	0	1	0
861	Female	17	1	1	0	0	0	0	0	0	0	1	1	0	0	0	1	0	0	0	1	0	1	0	0
862	Female	17	1	1	0	0	0	0	0	0	0	1	1	0	0	1	1	0	0	1	1	1	0	0	0
863	Male	16	1	0	0	1	0	0	0	0	0	1	0	0	0	0	1	0	0	1	0	0	0	0	0
864	Male	17	1	1	0	0	0	1	0	0	0	1	0	0	0	0	1	0	0	1	0	0	1	0	0
865	Male	16	1	1	0	0	0	0	0	0	0	1	0	0	0	0	1	0	0	0	1	1	0	0	0
866	Male	15	1	0	1	0	0	1	0	0	0	1	0	0	0	0	1	0	0	0	1	0	0	0	0
867	Male	18	1	0	0	0	0	1	0	0	0	1	0	0	0	0	1	0	0	0	0	0	0	0	0
868	Male	11	1	0	0	0	0	1	0	0	0	0	0	0	0	0	1	0	0	1	1	0	1	0	0
869	Male	14	1	0	0	1	0	0	0	0	0	0	0	0	0	0	1	0	0	1	1	1	1	0	0
870	Female	12	1	1	1	0	0	0	0	0	0	0	0	0	0	0	1	0	0	0	1	0	1	0	0
871	Female	14	1	1	1	0	0	1	0	0	0	0	0	0	0	0	1	0	0	0	1	0	1	0	0
872	Male	15	1	0	0	0	0	1	0	0	0	0	0	0	0	0	1	0	0	1	1	0	0	0	0
873	Male	17	1	1	0	0	0	0	0	0	0	0	0	0	0	0	1	0	0	1	0	0	1	0	0
874	Female	18	1	0	0	0	0	1	0	0	0	0	0	0	0	0	1	0	0	1	1	1	0	0	0
875	Female	18	1	1	0	0	0	0	0	0	0	0	0	0	0	1	1	0	0	0	1	1	0	0	0
876	Female	19	1	0	0	0	0	1	0	0	0	0	0	0	0	0	1	0	0	1	1	0	0	0	0
877	Female	18	1	1	0	0	0	0	0	0	0	0	0	0	0	0	1	0	0	0	1	0	0	0	0
878	Male	17	1	1	0	0	0	0	0	0	0	0	0	0	0	0	1	0	0	1	0	0	0	0	0
879	Male	14	1	1	1	0	0	0	0	0	0	0	0	0	0	0	1	0	0	1	1	0	0	0	1
880	Female	14	1	1	1	0	0	0	0	0	0	0	0	0	0	0	1	0	0	1	1	0	0	0	1
881	Male	19	1	1	1	0	0	1	0	0	0	0	0	0	0	0	1	0	0	1	1	1	1	0	0
882	Male	19	1	0	0	0	0	0	0	0	0	0	0	0	0	0	1	0	0	1	1	1	1	0	0
883	Female	14	1	1	1	0	0	1	0	0	0	0	0	0	0	0	1	0	0	1	1	1	1	0	0
884	Female	17	1	0	1	0	0	1	0	0	0	0	0	0	0	0	1	0	0	0	1	1	1	0	0
885	Female	18	1	1	0	0	0	0	0	0	0	0	0	0	0	0	1	0	0	0	1	1	1	0	0
886	Male	17	1	1	0	0	0	0	0	0	0	0	0	0	0	0	1	0	0	1	1	0	1	0	0
887	Female	14	1	0	0	0	0	1	0	0	0	0	0	0	0	0	1	0	0	1	1	0	1	0	0
888	Male	17	1	1	1	0	0	0	0	0	0	0	0	0	0	0	1	0	0	0	1	0	1	0	0
889	Male	15	1	0	1	1	0	0	0	0	0	0	0	0	0	0	1	0	0	0	1	0	1	0	0
890	Male	17	1	1	0	0	0	0	0	0	0	0	0	0	0	0	1	0	0	0	1	0	1	0	0
891	Male	14	1	0	1	0	0	1	0	0	0	0	0	0	0	0	1	0	0	0	0	1	1	0	0
892	Male	15	1	1	0	0	0	0	0	0	0	0	0	0	0	0	1	0	0	0	0	1	1	0	0
893	Male	15	1	1	1	0	0	0	0	0	0	0	0	0	0	0	1	0	0	0	0	0	1	0	0
894	Female	15	1	1	1	0	0	1	0	0	0	0	0	0	0	0	1	0	0	1	1	1	0	0	0
895	Male	17	1	0	0	0	0	1	0	0	0	0	0	0	0	0	1	0	0	1	1	1	0	0	0
896	Female	14	1	1	0	0	0	0	0	0	0	0	0	0	0	0	1	0	0	1	1	1	0	0	0
897	Male	18	1	0	0	0	0	0	0	0	0	0	0	0	0	0	1	0	0	1	1	1	0	0	0
898	Female	18	1	1	0	0	0	1	0	0	0	0	0	0	0	0	1	0	0	1	1	1	0	0	0
899	Female	18	1	1	0	0	0	0	0	0	0	0	0	0	0	0	1	0	0	1	1	1	0	0	0
900	Female	18	1	0	0	0	0	1	0	0	0	0	0	0	0	0	1	0	0	1	1	1	0	0	0
901	Female	19	1	0	1	0	0	0	0	0	0	0	0	0	0	0	1	0	0	0	1	1	0	0	0
902	Female	17	1	1	1	0	0	0	0	0	0	0	0	0	0	0	1	0	0	0	1	1	0	0	0
903	Male	17	1	0	1	0	0	1	0	0	0	0	0	0	0	0	1	0	0	1	1	0	0	0	0
904	Male	18	1	0	0	0	0	0	0	0	0	0	0	0	0	0	1	0	0	1	1	0	0	0	0
905	Male	13	1	1	0	0	0	0	0	0	0	0	0	0	0	0	1	0	0	1	1	0	0	0	0
906	Female	17	1	0	1	0	0	1	0	0	0	0	0	0	0	1	1	0	0	1	1	0	0	0	0
907	Female	14	1	1	1	0	0	1	0	0	0	0	0	0	0	0	1	0	0	1	1	0	0	0	0
908	Male	13	1	1	0	0	0	0	0	0	0	0	0	0	0	0	1	0	0	1	1	0	0	0	0
909	Male	16	1	0	0	0	0	1	0	0	0	0	0	0	0	0	1	0	0	1	1	0	0	0	0
910	Male	14	1	0	0	0	0	1	0	0	0	0	0	0	0	0	1	0	0	1	1	0	0	0	0
911	Female	16	1	1	1	0	0	0	0	0	0	0	0	0	0	0	1	0	0	1	1	0	0	0	0
912	Male	18	1	0	0	1	0	0	0	0	0	0	0	0	0	0	1	0	0	1	1	0	0	0	0
913	Female	15	1	1	0	0	0	0	0	0	0	0	0	0	0	0	1	0	0	1	1	0	0	0	0
914	Female	15	1	1	0	0	0	0	0	0	0	0	0	0	0	0	1	0	0	1	1	0	0	0	0
915	Male	15	1	0	0	0	0	0	0	0	0	0	0	0	0	0	1	0	0	0	1	0	0	0	0
916	Female	14	1	1	0	1	0	0	0	0	0	0	0	0	0	0	1	0	0	0	1	0	0	0	0
917	Male	18	1	1	0	0	0	1	0	0	0	0	0	0	0	0	1	0	0	0	1	0	0	0	0
918	Female	18	1	1	0	0	0	1	0	0	0	0	0	0	0	0	1	0	0	0	1	0	0	0	0
919	Female	17	1	1	1	0	0	0	0	0	0	0	0	0	0	0	1	0	0	0	1	0	0	0	0
920	Female	17	1	1	1	0	0	0	0	0	0	0	0	0	0	0	1	0	0	0	1	0	0	0	0
921	Male	18	1	1	1	0	0	0	0	0	0	0	0	0	0	0	1	0	0	0	1	0	0	0	0
922	Male	17	1	1	0	0	0	0	0	0	0	0	0	0	0	0	1	0	0	0	1	0	0	0	0
923	Male	17	1	1	0	0	0	0	0	0	0	0	0	0	0	0	1	0	0	0	1	0	0	0	0
924	Male	12	1	1	1	0	0	0	0	0	0	0	0	0	0	0	1	0	0	0	1	0	0	0	0
925	Female	18	1	0	1	0	0	0	0	0	0	0	0	0	0	0	1	0	0	0	1	0	0	0	0
926	Female	10	1	1	1	0	0	0	0	0	0	0	0	0	0	0	1	0	0	0	1	0	0	0	0
927	Male	14	1	1	0	0	0	0	0	0	0	0	0	0	0	0	1	0	0	0	1	0	0	0	0
928	Male	16	1	0	0	0	0	0	0	0	0	0	0	0	0	0	1	0	0	0	1	0	0	0	0
929	Female	14	1	1	0	0	0	0	0	0	0	0	0	0	0	0	1	0	0	0	1	0	0	0	0
930	Female	14	1	1	1	0	0	0	0	0	0	0	0	0	0	0	1	0	0	0	1	0	0	0	0
931	Female	19	1	0	0	0	0	1	0	0	0	0	0	0	0	0	1	0	0	0	1	0	0	0	0
932	Female	14	1	1	1	0	0	0	0	0	0	0	0	0	0	0	1	0	0	0	1	0	0	0	0
933	Male	15	1	0	0	0	0	0	0	0	0	0	0	0	0	0	1	0	0	0	1	0	0	0	0
934	Male	14	1	0	0	0	0	1	0	0	0	0	0	0	0	0	1	0	0	0	1	0	0	0	0
935	Female	17	1	0	0	0	0	0	0	0	0	0	0	0	0	0	1	0	0	0	1	0	0	0	0
936	Male	12	1	1	0	0	0	0	0	0	0	0	0	0	0	0	1	0	0	0	1	0	0	0	0
937	Male	17	1	0	0	0	0	0	1	0	0	0	0	0	0	0	1	0	0	1	0	1	0	0	0
938	Male	17	1	1	0	0	0	0	0	0	0	0	0	0	0	0	1	0	0	0	0	1	0	0	0
939	Male	15	1	0	1	0	0	0	0	0	0	0	0	0	0	0	1	0	0	0	0	1	0	0	0
940	Female	19	1	1	0	0	0	0	0	0	0	0	0	0	0	0	1	0	0	0	0	1	0	0	0
941	Female	17	1	1	0	0	0	0	0	0	0	0	0	0	0	1	1	0	0	0	0	1	0	0	0
942	Female	11	1	0	0	0	0	1	0	0	0	0	0	0	0	0	1	0	0	0	0	1	0	0	0
943	Male	18	1	1	0	0	0	1	0	0	0	0	0	0	0	0	1	0	0	0	0	1	0	0	0
944	Male	19	1	0	0	0	0	1	0	0	0	0	0	0	0	0	1	0	0	0	0	1	0	0	0
945	Female	14	1	1	0	0	0	0	0	0	0	0	0	0	0	0	1	0	0	0	0	1	0	0	0
946	Female	14	1	0	0	0	0	1	0	0	0	0	0	0	0	0	1	0	0	0	0	1	0	0	0
947	Female	19	1	0	0	0	0	1	0	0	0	0	0	0	0	0	1	0	0	0	0	1	0	0	0
948	Male	17	1	0	0	0	0	1	0	0	0	0	0	0	0	0	1	0	0	0	0	1	0	0	0
949	Male	17	1	0	0	0	0	0	1	0	0	0	0	0	0	0	1	0	0	0	0	1	0	0	0
950	Male	15	1	1	0	0	0	0	0	0	0	0	0	0	0	0	1	0	0	1	0	0	0	0	0
951	Male	17	1	0	0	1	0	0	0	0	0	0	0	0	0	0	1	0	0	1	0	0	0	0	0
952	Female	17	1	0	0	0	0	1	0	0	0	0	0	0	0	0	1	0	0	1	0	0	0	0	0
953	Female	15	1	0	0	0	0	0	0	0	0	0	0	0	0	0	1	0	0	1	0	0	0	0	0
954	Female	13	1	0	0	0	0	0	1	0	0	0	0	0	0	0	1	0	0	1	0	0	0	0	0
955	Male	17	1	0	0	0	0	1	0	0	0	0	0	0	0	0	1	0	0	1	0	0	0	0	0
956	Male	17	1	1	0	0	0	0	0	0	0	0	0	0	0	0	1	0	0	1	0	0	0	0	0
957	Male	14	1	0	0	0	0	1	0	0	0	0	0	0	1	0	1	0	0	1	0	0	0	0	0
958	Female	14	1	0	0	0	0	1	0	0	0	0	0	0	0	0	1	0	0	1	0	0	0	0	0
959	Male	19	1	0	1	0	0	0	0	0	0	0	0	0	0	0	1	0	0	1	0	0	0	0	0
960	Female	14	1	1	1	0	0	0	0	0	0	0	0	0	0	0	1	0	0	1	0	0	0	0	0
961	Female	14	1	0	1	0	0	1	0	0	0	0	0	0	0	0	1	0	0	1	0	0	0	0	0
962	Male	13	1	0	0	1	0	0	0	0	0	0	0	0	0	0	1	0	0	1	0	0	0	0	0
963	Female	16	1	0	0	0	0	1	0	0	0	0	0	0	0	0	1	0	0	1	0	0	0	0	0
964	Male	12	1	1	1	0	0	0	0	0	0	0	0	0	0	0	1	0	0	1	0	0	0	0	0
965	Male	17	1	0	0	0	0	0	0	0	0	0	0	0	0	0	1	0	0	1	0	0	0	0	0
966	Female	15	1	0	0	0	0	1	0	0	0	0	0	0	0	0	1	0	0	1	0	0	0	0	0
967	Male	16	1	0	0	0	0	1	0	0	0	0	0	0	0	0	1	0	0	1	0	0	0	0	0
968	Male	18	1	0	0	0	0	0	0	0	0	0	0	0	0	0	1	0	0	1	0	0	0	0	0
969	Female	18	1	0	0	0	0	1	0	0	0	0	0	0	0	0	1	0	0	1	0	0	0	0	0
970	Male	19	1	0	0	0	0	0	0	0	0	0	0	0	0	0	1	0	0	1	0	0	0	0	0
971	Female	14	1	1	1	0	0	0	0	0	0	0	0	0	0	0	1	0	0	1	0	0	0	0	0
972	Male	15	1	0	0	0	0	0	0	0	0	0	0	0	0	0	1	0	0	1	0	0	0	0	0
973	Female	17	1	0	0	0	0	1	0	0	0	0	0	0	0	0	1	0	0	0	0	0	0	0	0
974	Male	15	1	0	0	0	0	0	0	0	0	0	0	0	0	0	1	0	0	0	0	0	0	0	0
975	Male	18	1	0	0	0	0	0	0	0	0	0	0	0	0	0	1	0	1	0	0	0	0	0	0
976	Female	17	1	1	0	0	0	0	0	0	0	0	0	0	0	0	1	0	1	0	0	0	0	0	0
977	Female	11	1	1	1	0	0	0	0	0	0	0	0	0	0	0	1	0	1	0	0	0	0	0	0
978	Female	14	1	1	0	0	0	0	0	0	0	0	0	0	0	0	1	0	1	0	0	0	0	0	0
979	Male	18	1	1	0	0	0	0	0	0	0	0	0	0	0	0	1	0	1	0	0	0	0	0	0
980	Female	14	1	0	0	0	0	0	1	0	0	0	0	0	0	0	1	0	1	0	0	0	0	0	0
981	Male	17	1	0	0	0	0	0	0	0	0	0	0	0	0	0	1	0	1	0	0	0	0	0	0
982	Female	18	1	0	0	0	0	1	0	0	0	0	0	0	0	0	1	0	1	0	0	0	0	0	0
983	Male	15	1	0	0	0	0	1	0	0	0	0	0	0	0	0	1	0	1	0	0	0	0	0	0
984	Male	12	1	1	1	0	0	0	0	0	0	0	0	0	0	0	1	0	1	0	0	0	0	0	0
985	Female	19	1	1	1	0	0	0	0	0	0	0	0	1	1	1	0	0	0	0	1	1	0	0	0
986	Female	12	1	1	1	0	0	0	0	0	0	1	0	0	1	1	0	0	0	1	1	1	1	0	0
987	Female	16	1	1	1	0	0	1	0	0	0	0	0	0	1	1	0	0	0	0	1	1	1	0	0
988	Female	12	1	1	0	0	0	0	0	0	0	0	0	0	1	1	0	0	0	1	0	1	0	0	0
989	Male	13	1	0	0	0	0	0	0	0	0	0	0	0	1	1	0	0	0	0	0	0	0	0	0
990	Male	16	1	0	0	0	0	1	0	0	0	1	0	0	0	1	0	0	1	0	0	0	0	0	0
991	Male	19	1	1	0	0	0	0	0	0	0	1	0	0	0	1	0	0	0	0	0	1	0	0	0
992	Female	13	1	1	0	0	0	0	0	0	0	1	0	0	0	1	0	0	0	0	0	0	0	0	0
993	Female	12	1	1	0	0	0	1	0	0	0	0	0	0	0	1	0	0	0	1	1	1	0	0	0
994	Male	17	1	1	0	0	0	1	0	0	0	0	0	0	0	1	0	0	0	1	1	1	1	0	0
995	Male	14	1	0	1	0	0	1	0	0	0	0	0	0	0	1	0	0	0	0	1	0	1	0	0
996	Female	14	1	0	1	0	0	1	0	0	0	0	0	0	0	1	0	0	0	0	1	0	1	0	0
997	Female	15	1	0	0	0	0	1	0	0	0	0	0	0	0	1	0	0	0	1	0	1	1	0	0
998	Male	18	1	0	0	0	0	1	0	0	0	0	0	0	0	1	0	0	0	1	0	1	1	0	0
999	Male	17	1	0	0	0	0	1	0	0	0	0	0	0	0	1	0	0	0	0	0	1	1	0	0
1000	Male	17	1	0	1	0	0	1	0	0	0	0	0	0	0	1	0	0	0	0	0	0	1	0	0
1001	Male	19	1	1	0	0	0	0	0	0	0	0	0	0	0	1	0	0	0	1	1	1	0	0	0
1002	Male	14	1	0	0	0	0	1	0	0	0	0	0	0	0	1	0	0	0	1	1	1	0	0	0
1003	Female	17	1	1	0	0	0	0	0	0	0	0	0	0	0	1	0	0	0	1	1	1	0	0	0
1004	Female	19	1	1	0	0	0	0	0	0	0	0	0	0	0	1	0	0	0	1	1	1	0	0	0
1005	Male	17	1	0	0	0	0	0	0	0	0	0	0	0	0	1	0	0	0	0	1	1	0	0	0
1006	Male	19	1	0	0	0	0	1	0	0	0	0	0	0	0	1	0	0	0	0	1	1	0	0	0
1007	Male	15	1	1	0	0	0	0	0	0	0	0	0	0	0	1	0	0	0	1	1	0	0	0	0
1008	Male	18	1	1	0	0	0	0	0	0	0	0	0	0	0	1	0	0	0	1	1	0	0	0	0
1009	Male	17	1	1	0	0	0	0	0	0	0	0	0	0	0	1	0	0	0	1	1	0	0	0	0
1010	Male	15	1	1	1	0	0	0	0	0	0	0	0	0	0	1	0	0	0	0	1	0	0	0	0
1011	Female	14	1	1	1	0	0	0	0	0	0	0	0	0	0	1	0	0	0	0	1	0	0	0	0
1012	Male	14	1	0	0	0	0	1	0	0	0	0	0	0	0	1	0	0	0	0	1	0	0	0	0
1013	Male	12	1	1	0	0	0	0	0	0	0	0	0	0	0	1	0	0	0	1	0	1	0	0	0
1014	Male	17	1	0	0	1	0	0	0	0	0	0	0	0	0	1	0	0	0	1	0	1	0	0	0
1015	Female	18	1	1	0	0	0	0	0	0	0	0	0	0	0	1	0	0	0	1	0	1	0	0	0
1016	Male	15	1	0	0	0	0	1	0	0	0	0	0	0	0	1	0	0	0	0	0	1	0	0	0
1017	Male	18	1	0	0	0	0	1	0	0	0	0	0	0	0	1	0	0	0	0	0	1	0	0	0
1018	Male	15	1	0	0	1	0	0	0	0	0	0	0	0	0	1	0	0	0	0	0	1	0	0	0
1019	Male	17	1	0	0	0	0	1	0	0	0	0	0	0	0	1	0	0	0	0	0	1	0	0	0
1020	Female	19	1	0	0	0	0	1	0	0	0	0	0	0	0	1	0	0	0	0	0	1	0	0	0
1021	Male	17	1	1	0	0	0	0	0	0	0	0	0	0	0	1	0	0	0	1	0	0	0	0	0
1022	Male	18	1	1	0	0	0	0	0	0	0	0	0	0	0	1	0	0	0	1	0	0	0	0	0
1023	Male	18	1	0	0	0	0	0	0	0	0	0	0	0	0	1	0	0	0	1	0	0	0	0	0
1024	Male	19	1	0	0	0	0	1	0	0	0	0	0	0	0	1	0	0	0	1	0	0	0	0	0
1025	Male	14	1	1	0	0	0	0	0	0	0	0	0	0	0	1	0	0	0	0	0	0	0	0	0
1026	Female	17	1	1	0	0	0	0	0	0	0	0	0	0	0	1	0	0	0	0	0	0	0	0	0
1027	Female	17	1	1	0	0	0	0	0	0	0	0	0	0	0	1	0	0	0	0	0	0	0	0	0
1028	Male	14	1	1	0	0	0	0	0	0	0	0	0	0	0	1	0	0	0	0	0	0	0	0	0
1029	Male	19	1	0	0	0	0	1	0	0	0	0	0	0	0	1	0	0	1	0	0	0	0	0	0
1030	Male	16	1	1	0	0	0	0	0	0	0	0	0	0	0	1	0	0	1	0	0	0	0	0	0
1031	Male	18	1	0	0	1	0	0	0	0	0	0	0	0	0	1	0	0	1	0	0	0	0	0	0
1032	Female	12	1	1	1	0	0	0	0	0	0	0	0	0	0	1	0	0	1	0	0	0	0	0	0
1033	Female	17	1	0	0	0	0	0	0	0	0	0	0	0	0	1	0	0	1	0	0	0	0	0	0
1034	Male	14	1	1	0	0	0	0	0	0	0	1	0	0	0	1	0	0	0	1	1	0	0	0	0
1035	Female	17	1	1	0	0	0	1	0	0	0	1	0	0	1	0	0	0	0	1	1	1	0	0	0
1036	Female	17	1	1	0	0	0	0	0	0	0	0	0	0	1	0	0	0	0	0	1	0	1	0	0
1037	Female	12	1	1	0	0	0	0	0	0	0	0	0	0	1	0	0	0	0	0	1	0	0	0	0
1038	Male	15	1	0	0	1	0	0	0	0	0	0	0	0	1	0	0	0	0	1	0	0	0	0	0
1039	Female	16	1	0	0	0	0	1	0	0	0	0	0	0	1	0	0	0	0	1	0	0	0	0	0
1040	Male	19	1	0	0	0	0	0	0	0	0	0	0	0	1	0	0	0	0	0	0	0	0	0	0
1041	Female	18	1	0	0	0	0	0	0	0	0	0	0	1	1	0	0	0	0	1	1	1	0	0	0
1042	Male	14	1	1	1	0	0	0	0	0	0	0	1	1	0	0	0	0	0	0	1	0	0	0	0
1043	Female	13	1	1	1	0	0	0	0	0	0	1	0	1	0	0	0	0	0	0	1	0	0	0	0
1044	Female	15	1	1	0	0	0	0	0	0	0	0	0	1	0	0	0	0	0	0	0	0	1	0	0
1045	Male	14	1	1	1	0	0	0	0	0	0	0	0	1	0	0	0	0	0	0	1	0	0	0	0
1046	Female	18	1	1	1	0	0	0	0	0	0	0	0	1	0	0	0	0	0	0	0	1	0	0	0
1047	Female	17	1	0	0	0	0	0	0	0	0	0	0	1	0	0	0	0	0	0	0	1	0	0	0
1048	Male	12	1	1	0	0	0	0	0	0	0	1	1	0	0	0	0	0	0	0	0	1	0	0	0
1049	Female	18	1	0	0	0	0	0	0	0	0	0	1	0	0	0	0	0	0	0	1	0	0	0	0
1050	Female	14	1	1	0	0	0	0	0	0	0	0	1	0	0	0	0	0	1	0	0	0	0	0	0
1051	Male	12	1	1	1	0	0	0	0	0	0	0	0	1	0	0	0	0	0	1	1	0	1	0	0
1052	Female	17	1	0	0	0	0	1	0	0	0	0	0	1	0	0	0	0	0	0	0	1	0	0	0
1053	Female	18	1	0	0	0	0	1	0	0	0	0	0	0	0	1	0	0	0	0	1	0	0	0	0
1054	Female	14	1	1	0	0	0	0	0	0	0	0	0	1	0	0	0	0	0	0	0	1	0	0	0
1055	Male	18	1	0	0	1	0	0	0	0	0	0	0	1	0	0	0	0	0	1	0	0	0	0	0
1056	Female	15	1	0	0	0	0	1	0	0	0	0	0	1	0	0	0	0	1	0	0	0	0	0	0
1057	Male	17	1	0	0	0	0	1	0	0	0	0	0	1	0	0	0	0	1	0	0	0	0	0	0
1058	Female	11	1	0	0	0	0	1	0	0	0	0	0	1	0	0	0	0	1	0	0	0	0	0	0
1059	Male	17	1	0	0	0	1	0	0	0	1	0	0	0	0	0	0	0	0	0	0	0	0	0	0
1060	Male	14	1	0	1	0	1	0	0	0	1	0	0	0	0	1	1	0	0	0	1	0	0	0	0
1061	Male	17	1	0	0	0	1	0	0	0	1	1	0	0	0	0	1	0	0	1	1	0	0	0	0
1062	Female	17	1	1	0	0	0	0	0	1	0	0	0	1	0	0	1	0	0	1	1	0	0	0	0
1063	Male	15	1	0	0	0	1	0	0	0	0	0	0	0	0	0	0	1	0	0	0	0	0	0	0
1064	Male	12	1	0	0	0	1	0	0	0	0	0	0	0	0	0	0	1	1	0	0	0	0	0	0
1065	Female	13	1	1	0	0	1	0	0	0	0	0	0	0	0	0	0	0	1	0	0	0	0	0	0
1066	Male	16	1	1	0	0	1	0	0	0	0	0	0	0	0	0	0	0	0	1	1	1	1	0	0
1067	Male	19	1	1	0	0	1	1	0	0	0	0	0	0	0	1	1	0	0	0	0	0	1	0	0
1068	Male	17	1	0	0	1	1	1	0	0	0	0	0	0	0	1	1	0	0	1	1	1	0	0	0
1069	Female	13	1	1	1	0	1	1	0	0	0	1	0	0	0	0	1	0	0	1	1	1	1	0	0
1070	Female	15	1	1	0	0	1	1	0	0	0	0	0	0	0	0	1	0	0	1	1	1	1	0	0
1071	Female	13	1	1	0	0	0	0	0	0	0	0	0	0	0	1	1	0	0	0	0	1	0	0	0
1072	Male	17	1	0	0	1	1	0	0	0	0	0	0	1	0	1	0	0	0	1	1	0	1	0	0
1073	Male	17	1	0	0	1	1	0	0	0	0	0	0	0	0	1	0	0	0	1	0	0	0	0	0
1074	Male	13	1	0	0	1	1	0	0	0	0	1	0	0	1	0	0	0	0	1	0	0	0	0	0
1075	Female	14	1	0	0	0	1	0	0	0	0	1	0	0	1	0	0	0	1	0	0	0	0	0	0
1076	Female	18	1	0	1	0	1	0	1	0	0	0	0	1	0	0	0	0	0	1	1	0	0	0	0
1077	Female	17	1	0	0	1	1	0	0	0	0	0	1	0	0	0	0	0	0	1	1	1	1	0	0
1078	Male	17	1	0	1	0	0	0	0	0	1	0	1	1	0	0	0	0	0	0	1	1	1	0	1
1079	Male	14	1	0	0	0	0	0	0	0	1	0	0	0	0	0	0	0	0	0	1	0	0	0	0
1080	Male	18	1	0	0	0	0	0	0	0	1	0	0	0	0	0	0	0	1	0	0	0	0	0	0
1081	Female	18	1	1	0	0	0	1	0	0	1	0	0	0	0	0	1	0	0	1	1	1	0	0	0
1082	Female	16	1	1	1	0	0	1	0	1	0	1	0	1	0	1	1	0	0	0	1	1	1	1	0
1083	Female	13	1	0	0	0	0	1	0	0	0	0	0	0	0	0	1	0	0	0	1	0	1	0	0
1084	Male	15	1	0	1	0	0	1	0	0	0	0	0	0	0	0	1	0	0	1	1	1	0	0	0
1085	Male	18	1	0	1	0	0	1	1	0	0	0	0	0	1	1	0	0	0	1	0	0	0	0	0
1086	Female	18	1	1	1	0	1	1	0	0	0	0	0	0	0	1	1	0	0	0	1	0	1	0	0
1087	Female	18	1	0	0	0	0	0	0	0	0	0	0	1	0	0	0	0	0	0	1	0	0	0	0
1088	Male	13	1	0	0	0	0	1	0	0	1	0	0	0	0	1	0	1	0	1	1	1	1	0	1
1089	Male	14	1	0	1	0	0	0	0	0	1	0	0	0	0	0	0	1	0	1	1	0	0	0	0
1090	Female	19	1	0	0	0	0	0	0	0	1	0	0	0	0	0	0	1	0	0	1	0	0	0	0
1091	Female	15	1	0	0	0	0	1	0	0	1	0	0	0	0	0	0	0	0	1	0	1	0	0	0
1092	Female	17	1	0	0	0	0	0	0	0	1	0	0	0	0	1	1	0	0	1	1	1	0	0	0
1093	Male	14	1	1	0	0	0	0	0	0	1	0	0	0	0	1	1	0	0	1	1	0	0	0	0
1094	Female	15	1	0	0	0	0	1	0	0	1	0	0	0	0	0	1	0	0	0	1	1	0	0	0
1095	Female	18	1	0	1	0	0	1	0	0	1	0	0	0	0	1	1	0	0	1	0	1	0	0	0
1096	Female	17	1	0	0	0	0	1	0	0	1	0	0	0	0	0	1	0	0	0	1	0	1	0	0
1097	Female	17	1	0	0	0	0	1	0	0	1	0	0	0	0	0	1	0	0	1	0	1	0	0	0
1098	Male	19	1	0	0	0	0	1	0	0	1	0	0	0	0	0	1	0	0	0	0	1	0	0	0
1099	Female	18	1	1	1	0	0	0	0	0	1	0	0	0	0	1	0	0	0	0	0	1	0	0	0
1100	Male	11	1	0	1	0	0	0	0	0	1	0	0	0	0	1	0	0	0	0	0	0	0	0	0
1101	Female	13	1	1	1	0	0	1	0	1	0	0	0	0	1	1	1	0	0	0	1	0	1	0	0
1102	Female	14	1	1	0	0	0	1	0	1	0	0	0	0	0	1	1	0	0	1	1	1	0	0	0
1103	Female	17	1	1	1	0	0	1	0	1	0	0	0	0	0	1	1	0	0	1	1	1	1	0	0
1104	Female	19	1	0	0	0	0	1	0	1	0	0	0	1	0	0	1	0	0	1	1	1	0	0	0
1105	Male	18	1	1	0	0	0	0	0	0	0	1	0	0	0	0	1	1	0	0	1	1	0	0	0
1106	Male	16	1	0	0	0	0	1	1	0	0	0	0	0	0	0	1	1	0	1	0	0	0	0	0
1107	Female	15	1	0	0	0	0	1	0	0	0	0	0	0	0	0	0	1	0	0	1	1	1	0	0
1108	Female	19	1	0	0	0	0	1	0	0	0	0	0	0	0	0	0	1	0	1	1	1	0	0	0
1109	Female	13	1	1	0	0	0	0	0	0	0	0	0	0	0	0	0	0	0	0	1	0	0	0	0
1110	Male	17	1	1	0	0	0	0	0	0	0	0	0	0	0	0	0	0	0	1	0	1	0	0	0
1111	Female	13	1	0	0	0	0	0	0	0	0	0	0	0	0	0	0	0	0	1	0	0	0	0	0
1112	Female	14	1	1	0	0	0	0	0	0	0	0	0	0	0	0	0	0	1	0	0	0	0	0	0
1113	Female	18	1	0	1	0	0	1	0	0	0	0	0	0	0	0	0	0	1	0	0	0	0	0	0
1114	Female	18	1	1	0	0	0	1	0	0	0	0	0	0	1	1	1	0	0	1	1	1	1	0	0
1115	Female	18	1	1	1	0	0	1	0	0	0	0	0	0	1	1	1	0	0	1	0	0	1	0	0
1116	Female	18	1	1	1	0	0	1	0	0	0	0	0	0	1	1	1	0	0	1	0	0	1	0	0
1117	Female	16	1	0	1	0	0	1	0	0	0	0	0	1	0	1	1	0	0	1	1	1	0	0	0
1118	Male	18	1	1	0	0	0	1	0	0	0	0	0	1	0	1	1	0	0	1	0	0	0	0	0
1119	Female	19	1	1	0	0	0	1	0	0	0	0	0	0	0	1	1	0	0	0	1	1	0	0	0
1120	Male	16	1	1	1	0	0	1	0	0	0	0	0	0	0	1	1	0	0	1	0	1	0	0	0
1121	Male	18	1	0	1	0	0	1	0	0	0	0	0	0	0	1	1	0	0	0	1	1	1	0	0
1122	Male	14	1	1	1	0	0	1	0	0	0	0	0	0	0	1	1	0	0	1	1	0	1	0	0
1123	Female	12	1	0	1	0	0	1	0	0	0	0	0	0	0	1	1	0	0	0	1	0	1	0	0
1124	Male	13	1	0	0	0	0	1	0	0	0	0	0	0	0	1	1	0	0	1	1	1	0	0	0
1125	Male	17	1	0	0	0	0	1	0	0	0	0	0	0	0	1	1	0	0	1	1	1	0	0	0
1126	Male	16	1	1	0	0	0	0	0	0	0	0	0	0	0	1	1	0	0	1	1	1	0	0	0
1127	Female	11	1	1	1	0	0	0	0	0	0	0	0	0	0	1	1	0	0	1	1	1	0	0	0
1128	Male	18	1	0	0	0	0	1	0	0	0	0	0	0	0	1	1	0	0	0	1	1	0	0	0
1129	Male	14	1	0	1	0	0	1	0	0	0	0	0	0	0	1	1	0	0	1	0	1	0	0	0
1130	Female	18	1	0	0	1	0	1	0	0	0	0	0	0	0	1	1	0	0	1	0	1	0	0	0
1131	Male	14	1	1	0	0	0	1	0	0	0	0	0	0	0	1	1	0	1	0	0	0	0	0	0
1132	Male	13	1	0	0	0	0	1	0	0	0	0	0	0	1	0	1	0	0	0	1	0	0	0	0
1133	Female	12	1	1	1	0	0	0	0	0	0	1	0	0	0	0	1	0	0	0	0	0	0	0	0
1134	Male	16	1	0	0	0	0	1	0	0	0	1	0	0	0	0	1	0	1	0	0	0	0	0	0
1135	Female	18	1	0	0	1	0	1	0	0	0	0	0	0	0	0	1	0	0	1	1	1	0	0	0
1136	Male	14	1	0	0	0	0	1	0	0	0	0	0	0	0	0	1	0	0	0	0	0	1	0	0
1137	Male	13	1	0	1	0	0	1	0	0	0	0	0	0	0	0	1	0	1	0	0	0	0	0	0
1138	Male	17	1	0	0	0	0	1	0	0	0	0	0	0	0	0	1	0	0	1	1	1	1	0	0
1139	Male	16	1	0	0	0	0	1	0	0	0	0	0	0	0	0	1	0	0	0	1	1	1	0	0
1140	Female	16	1	0	0	0	0	1	0	0	0	0	0	0	0	0	1	0	0	0	1	1	1	0	0
1141	Female	18	1	0	0	0	0	1	0	0	0	0	0	0	0	0	1	0	0	1	1	0	1	0	0
1142	Female	19	1	1	1	0	0	0	1	0	0	0	0	0	0	0	1	0	0	1	1	1	0	0	0
1143	Female	17	1	1	0	0	0	0	0	0	0	0	0	0	0	0	1	0	0	0	1	1	0	0	0
1144	Female	17	1	0	1	0	0	0	0	0	0	0	0	0	0	0	1	0	0	0	1	1	0	0	0
1145	Female	14	1	1	0	0	0	1	0	0	0	0	0	0	0	0	1	0	0	1	1	0	0	0	0
1146	Female	11	1	0	1	0	0	1	0	0	0	0	0	0	0	0	1	0	0	0	1	0	0	0	0
1147	Male	14	1	1	0	0	0	0	0	0	0	0	0	0	0	0	1	0	0	0	1	0	0	0	0
1148	Female	19	1	0	1	0	0	1	0	0	0	0	0	0	0	0	1	0	0	0	1	0	0	0	0
1149	Female	19	1	1	0	0	0	0	0	0	0	0	0	0	0	0	1	0	0	0	1	0	0	0	0
1150	Female	14	1	0	0	0	0	1	0	0	0	0	0	0	0	0	1	0	0	0	0	1	0	0	0
1151	Female	18	1	0	1	0	0	1	0	0	0	0	0	0	0	0	1	0	0	0	0	1	0	0	0
1152	Female	19	1	0	0	0	0	1	0	0	0	0	0	0	0	0	1	0	0	0	0	1	0	0	0
1153	Female	19	1	0	0	0	0	1	0	0	0	0	0	0	0	0	1	0	0	0	0	1	0	0	0
1154	Male	19	1	0	0	0	0	1	0	0	0	0	0	0	0	0	1	0	0	0	0	1	0	0	0
1155	Female	18	1	0	0	0	0	1	0	0	0	0	0	0	0	0	1	0	0	1	0	0	0	0	0
1156	Male	16	1	0	0	0	0	1	0	0	0	0	0	0	0	0	1	0	0	1	0	0	0	0	0
1157	Female	15	1	1	0	0	0	0	0	0	0	0	0	0	0	0	1	0	0	1	0	0	0	0	0
1158	Female	11	1	0	0	0	0	1	0	0	0	0	0	0	0	0	1	0	0	1	0	0	0	0	0
1159	Male	18	1	0	0	0	0	1	0	0	0	0	0	0	0	0	1	0	0	1	0	0	0	0	0
1160	Male	19	1	0	0	0	0	1	0	0	0	0	0	0	0	0	1	0	0	1	0	0	0	0	0
1161	Male	13	1	0	0	0	0	1	0	0	0	0	0	0	0	0	1	0	0	1	0	0	0	0	0
1162	Female	17	1	1	1	0	0	0	0	0	0	0	0	0	0	0	1	0	0	0	0	0	0	0	0
1163	Female	15	1	1	0	0	0	0	0	0	0	0	0	0	1	0	1	0	0	0	1	0	0	0	0
1164	Male	17	1	1	0	0	0	1	0	0	0	1	0	0	1	1	0	0	0	1	0	1	0	0	0
1165	Male	17	1	0	0	0	0	0	0	0	0	1	0	0	0	1	0	0	0	1	0	0	0	0	0
1166	Female	14	1	0	0	0	0	1	0	0	0	0	0	0	0	1	0	0	0	0	1	0	1	0	0
1167	Female	17	1	1	0	0	0	1	0	0	0	0	0	0	0	1	0	0	0	1	1	1	0	0	0
1168	Male	12	1	1	1	0	0	0	0	0	0	0	0	0	0	1	0	0	0	0	1	0	0	0	0
1169	Female	14	1	1	1	0	0	0	0	0	0	0	0	0	0	1	0	0	0	0	1	0	0	0	0
1170	Female	18	1	1	0	0	0	1	0	0	0	0	0	0	0	1	0	0	0	0	1	0	0	0	0
1171	Male	11	1	0	0	0	0	1	0	0	0	0	0	0	0	1	0	0	0	1	0	1	0	0	0
1172	Male	17	1	0	0	0	0	1	0	0	0	0	0	0	0	1	0	0	0	0	0	1	0	0	0
1173	Male	16	1	0	0	0	0	1	0	0	0	0	0	0	0	1	0	0	0	0	0	1	0	0	0
1174	Male	11	1	0	0	0	0	1	0	0	0	0	0	0	0	1	0	0	0	0	0	1	0	0	0
1175	Male	14	1	0	1	0	0	1	0	0	0	0	0	0	0	1	0	0	0	1	0	0	0	0	0
1176	Male	14	1	0	1	1	0	0	0	0	0	0	0	0	0	1	0	0	0	1	0	0	0	0	0
1177	Male	11	1	0	0	0	0	0	0	0	0	0	0	0	0	1	0	0	0	0	0	0	0	0	0
1178	Female	17	1	1	0	0	0	1	0	0	0	0	1	0	1	0	0	0	0	0	1	1	0	0	0
1179	Female	14	1	1	0	0	0	0	0	0	0	0	0	0	1	0	0	0	0	0	1	0	0	0	0
1180	Male	14	1	1	0	0	0	0	0	0	0	0	0	0	0	1	0	0	0	0	0	0	0	0	1
1181	Male	14	1	1	1	0	0	0	0	0	0	0	0	0	1	0	0	0	0	0	1	0	1	0	0
1182	Male	17	1	0	0	0	0	1	0	0	0	0	0	0	0	1	0	0	0	1	0	0	0	0	0
1183	Male	12	1	0	0	0	0	1	0	0	0	0	0	1	0	0	0	0	0	1	0	0	0	0	0
1184	Female	14	1	0	0	0	1	0	0	0	1	0	0	0	0	0	0	0	0	1	0	0	1	0	0
1185	Male	16	1	1	0	0	1	0	0	0	0	0	0	0	0	0	0	0	0	1	0	0	0	0	0
1186	Female	15	1	1	0	1	1	0	0	0	0	0	0	1	0	0	1	0	0	0	1	0	0	0	0
1187	Female	15	1	1	1	0	1	0	0	0	1	0	0	1	0	0	1	0	0	0	1	0	0	0	1
1188	Male	12	1	1	1	0	1	1	0	1	0	0	0	1	0	0	0	0	0	0	1	0	1	0	0
1189	Male	18	1	1	1	0	1	0	0	0	0	0	0	1	1	0	1	0	0	1	1	0	1	0	0
1190	Female	17	1	1	0	0	0	0	0	0	1	0	0	0	0	0	0	1	0	1	1	0	0	0	1
1191	Male	13	1	1	1	0	0	1	0	0	1	0	0	0	0	0	1	0	0	1	0	0	0	0	0
1192	Female	15	1	1	0	0	0	0	0	1	1	0	0	0	1	1	1	0	0	1	1	0	0	0	0
1193	Female	16	1	1	1	0	0	1	0	1	1	0	0	0	0	1	1	0	0	1	1	1	0	0	0
1194	Female	14	1	0	0	0	0	0	0	0	1	0	0	0	0	1	1	0	0	0	0	1	0	0	0
1195	Female	18	1	1	1	0	0	1	0	0	1	0	0	1	0	0	1	0	0	0	0	0	0	0	0
1196	Male	17	1	1	0	0	0	0	0	1	0	0	0	0	1	1	1	0	0	1	1	1	1	0	0
1197	Female	14	1	1	1	0	0	1	0	1	0	0	0	0	0	1	1	0	0	0	1	0	0	0	0
1198	Male	17	1	0	1	0	0	0	1	1	0	0	0	0	0	1	1	0	0	1	1	0	1	0	0
1199	Female	16	1	1	1	0	0	1	1	1	0	1	0	0	1	0	1	0	0	0	0	0	0	0	0
1200	Female	15	1	1	1	0	0	0	0	1	0	0	0	1	0	0	1	0	0	1	1	0	0	1	0
1201	Female	15	1	1	0	0	0	0	0	1	0	0	0	0	0	0	1	0	0	0	1	0	0	0	0
1202	Female	15	1	1	1	0	0	1	0	0	0	0	0	0	0	0	0	0	0	1	1	1	1	0	0
1203	Male	13	1	0	0	0	0	0	1	0	0	1	0	0	1	1	1	0	0	1	1	0	1	1	0
1204	Female	14	1	1	1	0	0	0	0	0	0	0	0	0	0	1	1	0	0	1	1	0	0	0	0
1205	Female	18	1	0	0	0	0	1	1	0	0	0	0	0	0	1	1	0	0	1	0	1	0	0	0
1206	Female	18	1	1	0	0	0	0	0	0	0	0	0	0	0	1	1	0	0	1	0	0	0	0	0
1207	Female	14	1	1	0	0	0	1	0	0	0	0	0	0	1	1	1	0	0	0	1	1	1	0	0
1208	Female	17	1	1	1	0	0	1	0	0	0	0	0	0	1	0	1	0	0	1	1	0	1	0	0
1209	Female	18	1	1	0	0	0	0	0	0	0	0	0	0	1	0	1	0	0	0	1	0	0	0	0
1210	Female	15	1	1	0	0	0	1	0	0	0	0	0	1	0	0	1	0	0	1	1	1	1	0	0
1211	Female	17	1	1	0	1	0	0	1	0	0	0	0	1	0	0	1	0	0	0	1	0	1	0	0
1212	Female	18	1	1	0	0	0	1	0	0	0	0	0	1	0	0	1	0	0	0	1	1	0	0	0
1213	Female	14	1	1	0	0	0	0	0	0	0	1	0	0	0	0	1	0	0	0	1	0	0	0	0
1214	Male	14	1	0	0	0	0	1	0	0	0	0	0	0	0	0	1	0	0	1	1	1	0	0	0
1215	Female	13	1	1	0	0	0	0	0	0	0	0	0	0	0	1	1	0	0	0	1	0	0	0	0
1216	Female	16	1	0	0	0	0	1	0	0	0	0	0	0	0	0	1	0	0	1	1	1	1	0	0
1217	Female	18	1	1	0	0	0	0	0	0	0	0	0	0	0	0	1	0	0	1	1	0	0	0	0
1218	Male	17	1	0	0	1	0	0	0	0	0	0	0	0	0	0	1	0	0	1	1	0	0	0	0
1219	Female	17	1	0	0	0	0	0	0	0	0	0	0	0	1	1	0	0	0	0	0	0	0	0	0
1220	Male	18	1	0	0	0	0	0	0	0	0	0	0	0	0	1	0	0	0	1	1	1	0	0	0
1221	Male	10	1	1	0	0	0	0	0	0	0	0	0	0	0	1	0	0	0	0	0	0	0	0	0
1222	Female	16	1	0	0	0	1	0	0	0	1	0	0	0	1	1	1	0	0	1	0	0	0	0	0
1223	Female	12	1	1	1	0	0	0	0	0	0	1	1	0	0	0	1	0	0	1	1	1	1	0	0
1224	Female	14	1	1	0	0	0	1	1	0	0	0	0	0	0	0	1	0	0	0	1	0	0	0	0
1225	Female	13	1	1	1	0	0	1	0	0	0	0	0	0	0	0	1	0	0	0	1	1	1	0	0
1226	Male	18	1	0	0	0	0	0	0	0	1	0	0	0	0	0	0	1	0	1	0	1	0	0	0
1227	Male	12	1	0	0	0	0	1	0	0	1	0	0	0	0	1	1	0	0	0	0	1	1	0	0
1228	Male	18	1	0	0	0	0	0	0	0	1	0	0	0	0	1	1	0	0	1	0	0	0	0	0
1229	Male	17	1	1	0	0	0	0	0	0	1	0	0	0	0	0	1	0	0	0	1	0	1	0	0
1230	Male	17	1	0	0	0	0	0	0	0	1	0	0	0	0	0	1	0	0	0	1	0	1	0	0
1231	Female	17	1	0	0	0	0	0	0	0	1	1	0	0	0	1	0	0	0	0	0	1	0	0	0
1232	Male	11	1	0	1	0	0	0	0	0	1	1	0	0	0	1	0	0	0	1	1	1	1	0	0
1233	Female	19	1	0	0	0	0	0	0	0	1	0	0	0	0	0	0	0	0	0	1	0	0	0	0
1234	Female	18	1	0	1	0	0	0	1	0	1	0	0	1	0	1	1	0	0	1	1	0	0	0	0
1235	Female	15	1	0	0	0	0	1	0	0	1	0	0	1	0	0	1	0	1	0	0	0	0	0	0
1236	Female	16	1	1	1	0	0	1	0	0	1	1	0	1	0	0	1	0	0	0	1	0	1	0	0
1237	Female	17	1	1	0	0	0	0	0	0	1	0	0	0	0	0	1	0	0	1	1	0	1	0	0
1238	Female	18	1	0	1	0	0	0	0	0	1	0	0	0	0	0	1	0	0	0	1	0	0	0	0
1239	Female	19	1	0	0	0	0	1	0	0	1	0	0	0	1	1	0	0	0	1	1	0	0	0	0
1240	Female	19	1	0	0	0	0	1	0	0	1	0	0	0	1	1	0	0	0	0	1	0	0	0	0
1241	Male	14	1	0	0	0	0	0	1	1	0	0	0	0	1	0	0	0	0	1	1	0	1	0	0
1242	Male	18	1	0	0	0	0	1	0	1	0	0	0	0	0	0	0	0	0	1	1	0	1	0	0
1243	Male	16	1	0	0	0	0	0	0	1	0	0	0	0	0	0	0	0	0	1	0	1	0	0	0
1244	Female	18	1	0	1	0	0	1	0	1	0	0	0	0	1	1	1	0	0	1	1	0	0	0	0
1245	Male	17	1	0	0	0	0	1	0	1	0	0	0	0	1	1	1	0	0	1	0	1	0	0	0
1246	Female	18	1	1	1	0	0	1	1	1	0	0	0	0	0	1	1	0	0	0	1	1	1	0	0
1247	Male	19	1	0	0	0	0	1	0	1	0	0	0	0	0	1	1	0	0	1	1	1	0	0	0
1248	Female	15	1	0	1	0	0	1	0	1	0	0	0	0	0	1	1	0	0	0	1	0	0	0	0
1249	Female	17	1	1	1	0	0	0	0	1	0	1	0	1	0	0	1	0	0	0	1	1	1	0	0
1250	Female	12	1	1	1	0	0	0	0	1	0	0	0	1	0	0	1	0	0	0	1	1	0	0	0
1251	Female	17	1	0	0	0	0	1	0	1	0	0	0	1	0	0	1	0	0	0	1	1	0	0	0
1252	Male	18	1	1	0	0	0	1	1	1	0	0	0	0	1	0	1	0	0	0	1	1	1	1	0
1253	Male	18	1	0	0	0	0	0	0	1	0	0	0	0	0	0	1	0	0	0	1	1	1	0	0
1254	Male	15	1	0	0	0	0	0	1	1	0	0	0	0	0	0	1	0	0	0	0	0	1	0	0
1255	Male	15	1	1	0	0	0	1	0	1	0	0	0	0	0	0	1	0	0	0	0	1	0	0	0
1256	Female	17	1	0	0	0	0	0	0	1	0	0	0	0	0	0	1	0	0	1	0	0	1	0	0
1257	Male	12	1	0	1	0	0	1	0	1	0	0	0	0	1	1	0	0	0	1	0	1	1	0	0
1258	Male	13	1	0	0	0	0	0	0	1	0	0	0	0	1	0	0	0	1	0	0	0	0	0	0
1259	Male	18	1	0	0	0	0	1	0	1	0	0	0	0	1	0	0	0	0	1	1	1	1	1	1
1260	Female	18	1	0	1	0	0	1	0	0	0	0	0	0	0	0	0	0	0	1	1	1	1	0	0
1261	Male	15	1	1	0	0	0	0	0	0	0	0	0	0	0	0	0	0	0	0	1	0	0	0	0
1262	Female	18	1	1	1	0	0	0	1	0	0	0	0	0	0	0	0	0	0	0	1	0	0	0	0
1263	Male	18	1	0	0	0	0	0	0	0	0	0	0	0	0	0	0	0	0	0	0	1	0	0	0
1264	Male	16	1	0	0	0	0	1	0	0	0	0	0	0	0	0	0	0	0	1	0	0	0	0	0
1265	Male	14	1	1	0	0	0	1	0	0	0	1	1	0	1	1	1	0	0	0	1	1	1	0	1
1266	Male	17	1	0	0	0	0	0	0	0	0	1	0	0	1	1	1	0	0	1	1	0	0	0	0
1267	Male	16	1	1	1	0	0	0	0	0	0	1	1	0	1	1	1	0	0	0	1	0	1	0	0
1268	Female	18	1	1	0	0	0	0	0	0	0	0	0	0	1	1	1	0	0	1	1	1	0	0	0
1269	Male	16	1	1	0	0	0	1	0	0	0	0	0	0	1	1	1	0	1	0	0	0	0	0	0
1270	Male	18	1	0	0	0	0	1	0	0	0	0	0	0	1	1	1	0	0	1	1	1	1	0	0
1271	Female	14	1	1	0	0	0	1	0	0	0	0	0	0	1	1	1	0	0	0	1	1	1	0	0
1272	Female	15	1	1	0	0	0	0	0	0	0	0	0	0	1	1	1	0	0	0	1	0	1	0	0
1273	Male	19	1	0	0	1	0	1	0	0	0	0	0	0	1	1	1	0	0	1	0	1	1	0	0
1274	Male	18	1	1	0	1	0	1	1	0	0	0	0	0	1	1	1	0	0	1	0	1	1	0	0
1275	Female	19	1	1	0	0	0	1	0	0	0	0	0	0	1	1	1	0	0	0	0	0	0	0	0
1276	Male	19	1	1	0	0	0	0	0	0	0	1	0	1	0	1	1	0	0	1	0	0	0	0	0
1277	Female	17	1	1	1	1	0	0	0	0	0	0	0	1	0	1	1	0	0	1	1	0	1	0	0
1278	Male	14	1	0	0	0	0	0	0	0	0	1	0	0	0	1	1	0	0	1	1	0	0	0	0
1279	Male	15	1	1	1	0	0	0	1	0	0	1	0	0	0	1	1	0	0	1	1	0	0	0	0
1280	Female	12	1	1	1	0	0	0	0	0	0	0	0	0	0	1	1	0	0	1	1	0	1	0	0
1281	Male	16	1	1	1	0	0	0	1	0	0	0	0	0	0	1	1	0	1	0	0	0	0	0	0
1282	Female	17	1	1	1	1	0	0	0	0	0	0	0	0	0	1	1	0	0	1	1	0	1	0	0
1283	Male	18	1	1	0	0	0	0	0	0	0	0	0	0	0	1	1	0	0	1	0	1	1	0	0
1284	Female	19	1	0	1	0	0	1	0	0	0	0	0	0	0	1	1	0	0	1	0	1	1	0	0
1285	Female	17	1	0	0	0	0	1	0	0	0	0	0	0	0	1	1	0	0	1	1	1	0	0	0
1286	Female	12	1	0	0	0	0	1	0	0	0	0	0	0	0	1	1	0	0	1	1	1	0	0	0
1287	Female	15	1	1	1	0	0	1	0	0	0	0	0	0	0	1	1	0	0	0	1	1	0	0	0
1288	Male	15	1	1	0	0	0	0	0	0	0	0	0	0	0	1	1	0	0	1	1	0	0	0	0
1289	Female	14	1	0	1	0	0	1	1	0	0	0	0	0	0	1	1	0	0	1	1	0	0	0	0
1290	Female	18	1	1	1	0	0	0	0	0	0	0	0	0	0	1	1	0	0	1	1	0	0	0	0
1291	Male	16	1	0	0	0	0	0	1	0	0	0	0	0	0	1	1	0	0	0	1	0	0	0	0
1292	Female	18	1	0	0	1	0	0	0	0	0	0	0	0	0	1	1	0	0	1	0	1	0	0	0
1293	Male	17	1	0	0	0	0	1	0	0	0	0	0	0	0	1	1	0	0	0	0	1	0	0	0
1294	Male	17	1	0	1	0	0	1	0	0	0	0	0	0	0	1	1	0	0	0	0	1	0	0	0
1295	Male	19	1	0	0	0	0	1	0	0	0	1	0	0	0	1	1	0	0	1	1	0	1	0	0
1296	Male	18	1	1	0	0	0	0	0	0	0	0	0	1	1	0	1	0	0	1	1	0	0	0	0
1297	Female	18	1	1	1	0	0	0	0	0	0	1	1	0	1	0	1	0	0	0	1	1	0	0	0
1298	Male	14	1	0	0	0	0	1	0	0	0	1	0	0	1	1	1	0	0	0	1	0	0	0	0
1299	Male	18	1	1	0	0	0	1	0	0	0	0	0	0	1	0	1	0	0	0	1	1	0	0	0
1300	Female	18	1	1	0	0	0	1	0	0	0	0	0	0	1	1	1	0	0	0	1	0	0	0	0
1301	Female	19	1	1	0	0	0	0	0	0	0	0	0	0	1	0	1	0	0	1	1	1	0	0	0
1302	Female	18	1	1	0	0	0	1	0	0	0	0	0	1	0	0	1	0	0	1	1	1	1	0	0
1303	Female	15	1	1	1	0	0	1	0	0	0	0	0	1	0	0	1	0	0	0	1	1	0	0	0
1304	Female	18	1	1	1	0	0	0	0	0	0	0	1	0	0	0	1	0	0	0	1	0	1	0	0
1305	Female	14	1	1	1	0	0	0	0	0	0	1	0	0	0	0	1	0	0	1	0	0	0	0	0
1306	Male	10	1	1	1	0	0	0	0	0	0	1	0	0	0	0	1	0	1	0	0	0	0	0	0
1307	Female	18	1	0	0	0	0	1	0	0	0	0	0	0	0	0	1	0	0	1	1	1	1	0	0
1308	Male	12	1	1	0	0	0	1	0	0	0	0	0	0	0	0	1	0	0	0	1	1	1	0	0
1309	Female	15	1	0	0	0	0	1	0	0	0	0	0	0	0	1	1	0	0	1	1	0	1	0	0
1310	Male	14	1	1	0	1	0	1	0	0	0	0	0	0	0	0	1	0	0	0	1	0	1	0	0
1311	Male	19	1	0	0	1	0	1	0	0	0	0	0	0	0	0	1	0	0	1	0	1	1	0	0
1312	Male	17	1	0	0	0	0	1	0	0	0	0	0	0	0	0	1	0	0	0	0	1	1	0	0
1313	Female	14	1	1	1	0	0	0	0	0	0	0	0	0	0	0	1	0	0	0	1	0	0	0	0
1314	Female	19	1	0	0	0	0	1	0	0	0	0	0	0	0	0	1	0	0	0	0	1	0	0	0
1315	Female	19	1	0	1	0	0	1	1	0	0	0	0	0	0	0	1	0	0	1	1	1	1	0	0
1316	Male	13	1	1	0	0	0	0	0	0	0	0	0	0	0	0	1	0	0	1	1	0	1	0	0
1317	Male	12	1	1	0	0	0	1	0	0	0	0	0	0	0	1	1	0	0	1	1	0	1	0	0
1318	Female	15	1	1	1	0	0	1	0	0	0	0	0	0	0	0	1	0	0	0	1	0	1	0	0
1319	Male	18	1	1	0	1	0	1	0	0	0	0	0	0	0	0	1	0	0	0	1	0	1	0	0
1320	Female	15	1	1	0	0	0	0	0	0	0	0	0	0	0	0	1	0	0	1	0	0	1	0	0
1321	Female	18	1	1	0	0	0	0	0	0	0	0	0	0	0	0	1	0	0	1	1	1	0	0	0
1322	Male	17	1	0	0	0	0	1	0	0	0	0	0	0	0	0	1	0	0	1	1	1	0	0	0
1323	Female	17	1	1	1	0	0	0	0	0	0	0	0	0	0	0	1	0	0	1	1	1	0	0	0
1324	Female	14	1	1	0	0	0	1	0	0	0	0	0	0	0	0	1	0	0	1	1	1	0	0	0
1325	Female	17	1	1	0	0	0	1	0	0	0	0	0	0	0	0	1	0	0	1	1	1	0	0	0
1326	Male	19	1	0	0	0	0	1	0	0	0	0	0	0	0	0	1	0	0	0	1	1	0	0	0
1327	Female	17	1	1	0	0	0	0	0	0	0	0	0	0	0	0	1	0	0	0	1	1	0	0	0
1328	Female	17	1	1	0	0	0	0	0	0	0	0	0	0	0	0	1	0	0	1	1	0	0	0	0
1329	Female	17	1	0	0	0	0	0	1	0	0	0	0	0	0	0	1	0	0	0	1	0	0	0	0
1330	Female	16	1	0	1	0	0	1	0	0	0	0	0	0	0	0	1	0	0	0	1	0	0	0	0
1331	Male	15	1	1	1	0	0	0	0	0	0	0	0	0	0	0	1	0	0	0	1	0	0	0	0
1332	Male	19	1	0	0	0	0	1	0	0	0	0	0	0	0	0	1	0	0	0	1	0	0	0	0
1333	Male	14	1	0	0	0	0	0	1	0	0	0	0	0	0	0	1	0	0	0	0	1	0	0	0
1334	Female	11	1	1	1	0	0	0	0	0	0	0	0	0	0	0	1	0	0	0	0	1	0	0	0
1335	Female	11	1	1	1	0	0	0	0	0	0	0	0	0	0	0	1	0	0	0	0	1	0	0	0
1336	Male	15	1	0	0	0	0	1	0	0	0	0	0	0	0	0	1	0	0	0	0	1	0	0	0
1337	Female	18	1	1	0	0	0	0	0	0	0	0	0	0	0	0	1	0	0	1	0	0	0	0	0
1338	Female	18	1	1	1	0	0	0	0	0	0	0	0	0	0	0	1	0	0	1	0	0	0	0	0
1339	Male	13	1	1	0	0	0	1	0	0	0	0	0	0	0	0	1	0	0	0	0	0	0	0	0
1340	Male	19	1	1	0	0	0	0	0	0	0	0	0	0	0	0	1	0	0	0	0	0	0	0	0
1341	Female	18	1	1	0	0	0	0	0	0	0	0	0	0	0	0	1	0	1	0	0	0	0	0	0
1342	Male	17	1	0	0	0	0	1	0	0	0	0	0	0	0	0	1	0	1	0	0	0	0	0	0
1343	Male	18	1	1	0	0	0	0	0	0	0	0	0	0	0	0	1	0	1	0	0	0	0	0	0
1344	Male	15	1	1	1	0	0	0	0	0	0	0	0	0	1	1	0	0	0	1	0	0	0	0	0
1345	Female	12	1	1	0	0	0	0	0	0	0	1	0	0	1	1	0	0	0	0	0	0	0	0	0
1346	Male	18	1	0	0	0	0	1	0	0	0	1	0	0	1	1	0	0	0	0	1	1	0	0	0
1347	Male	14	1	1	1	0	0	0	0	0	0	0	0	0	0	1	0	0	0	0	1	0	0	0	0
1348	Male	14	1	0	0	0	0	1	0	0	0	0	0	0	0	1	0	0	0	0	0	1	0	0	0
1349	Male	18	1	0	0	0	0	0	0	0	0	0	0	0	0	1	0	0	0	0	0	0	0	0	1
1350	Male	19	1	1	1	0	0	0	0	0	0	0	0	0	0	1	0	0	0	1	1	1	1	0	0
1351	Male	18	1	1	0	0	0	1	0	0	0	0	0	0	0	1	0	0	0	1	1	0	1	0	0
1352	Female	18	1	1	0	0	0	0	0	0	0	0	0	0	0	1	0	0	0	1	1	1	0	0	0
1353	Female	16	1	1	1	0	0	0	0	0	0	0	0	0	0	1	0	0	0	0	1	0	0	0	0
1354	Male	19	1	1	0	0	0	1	0	0	0	0	0	0	0	1	0	0	0	1	0	1	0	0	0
1355	Male	17	1	0	0	1	0	0	0	0	0	0	0	0	0	1	0	0	0	0	0	1	0	0	0
1356	Female	13	1	1	0	0	0	0	0	0	0	0	0	0	0	1	0	0	1	0	0	0	0	0	0
1357	Female	14	1	1	1	0	0	0	0	0	0	0	0	0	1	0	0	0	0	0	0	1	1	0	0
1358	Female	17	1	0	1	0	0	1	0	0	0	0	0	0	1	0	0	0	0	0	1	0	0	0	0
1359	Male	15	1	1	0	0	0	0	0	0	0	0	0	0	1	0	0	0	0	0	1	0	1	0	0
1360	Male	18	1	0	1	1	0	1	0	0	0	0	0	0	1	0	0	0	0	1	1	0	0	0	0
1361	Female	17	1	1	0	0	0	0	0	0	0	0	0	0	1	0	0	0	0	1	1	1	0	0	0
1362	Male	14	1	1	0	0	0	0	0	0	0	0	0	0	1	0	0	0	0	0	1	0	0	0	0
1363	Female	18	1	0	1	0	0	0	0	0	0	0	0	0	1	0	0	0	0	1	0	0	0	0	0
1364	Female	17	1	1	1	0	0	0	0	0	0	0	0	1	0	0	0	0	0	0	1	0	0	0	0
1365	Male	11	1	1	0	0	0	0	0	0	0	0	1	0	0	0	0	0	0	0	0	1	0	0	0
1366	Male	17	1	0	0	0	0	1	0	0	0	0	0	1	0	0	0	0	0	1	1	0	0	0	0
1367	Male	12	1	0	1	0	0	1	0	0	0	0	0	1	0	0	0	0	0	1	0	0	0	0	0
1368	Male	17	1	0	0	0	0	0	0	0	0	0	0	1	0	0	0	0	1	0	0	0	0	0	0
1369	Female	18	1	0	0	0	1	0	0	0	1	1	1	0	1	1	1	0	0	0	0	0	0	0	1
1370	Female	15	1	0	0	0	0	0	0	0	1	0	0	0	0	0	1	0	0	1	1	0	0	0	0
1371	Female	18	1	1	0	0	1	0	0	0	1	1	1	0	0	1	1	0	0	1	1	1	0	0	0
1372	Male	16	1	0	1	0	1	0	1	1	0	0	0	1	0	1	1	0	0	1	0	0	1	0	0
1373	Female	14	1	1	1	0	1	0	0	1	0	0	0	0	0	1	0	0	0	0	1	0	0	0	0
1374	Male	14	1	1	0	0	1	0	1	0	0	0	0	0	0	0	1	0	0	1	1	0	1	0	0
1375	Male	14	1	0	1	0	1	1	0	0	0	0	0	0	0	0	0	0	1	0	0	0	0	0	0
1376	Female	15	1	0	0	1	1	0	0	0	0	0	0	0	0	1	1	0	0	1	1	1	1	0	0
1377	Male	11	1	1	0	0	1	1	0	0	0	0	0	0	0	1	1	0	0	1	1	1	0	0	0
1378	Male	17	1	1	0	0	1	1	1	0	0	0	0	0	1	0	1	0	0	1	1	0	0	0	0
1379	Female	12	1	0	0	1	1	0	1	0	0	1	1	0	0	0	1	0	1	0	0	0	0	0	0
1380	Female	12	1	1	0	0	1	0	0	0	0	0	0	0	0	0	1	0	0	1	1	1	0	0	0
1381	Male	14	1	1	1	0	1	0	0	0	0	0	0	0	0	0	1	0	0	0	1	0	0	0	0
1382	Male	19	1	0	0	0	1	0	0	0	0	0	0	0	0	0	1	0	0	0	1	0	1	0	0
1383	Female	18	1	1	1	0	1	1	0	0	0	0	0	0	0	0	1	0	0	0	1	0	0	0	0
1384	Male	15	1	1	1	0	1	0	0	0	0	0	0	0	0	0	1	0	0	0	1	0	0	0	0
1385	Female	17	1	1	0	0	1	0	0	0	0	0	0	0	0	0	1	0	0	1	0	1	0	0	0
1386	Male	15	1	1	1	0	1	0	0	0	0	0	0	0	0	0	1	0	1	0	0	0	0	0	0
1387	Female	14	1	1	1	0	1	0	0	0	0	0	0	0	0	0	1	0	1	0	0	0	0	0	0
1388	Male	11	1	1	1	0	1	0	0	0	0	0	0	0	1	0	0	0	1	0	0	0	0	0	0
1389	Male	10	1	1	0	0	0	1	0	0	0	1	1	1	1	1	1	0	0	0	1	0	1	1	0
1390	Female	14	1	0	0	0	1	0	1	0	1	0	0	0	0	0	1	0	0	0	1	0	0	0	0
1391	Male	12	1	1	0	0	0	0	0	1	0	1	0	0	0	0	1	0	0	0	1	0	1	0	0
1392	Female	17	1	1	0	0	1	1	0	0	0	0	0	1	0	1	0	0	0	1	1	1	0	0	0
1393	Female	14	1	0	1	0	0	1	0	0	1	0	0	0	0	1	0	1	0	1	1	1	1	0	0
1394	Female	19	1	1	0	0	0	1	0	1	1	0	0	1	1	0	1	0	0	1	1	1	1	0	0
1395	Female	19	1	1	0	0	0	0	0	1	1	0	0	0	1	0	1	0	0	0	1	1	1	0	0
1396	Female	17	1	0	0	0	0	0	0	1	1	0	0	1	0	0	1	0	0	1	1	0	1	0	0
1397	Female	16	1	1	1	0	0	1	0	0	1	0	0	0	0	1	1	0	0	1	1	0	1	0	0
1398	Female	17	1	1	1	0	0	1	1	1	0	1	0	0	1	1	1	0	0	1	1	0	1	0	0
1399	Female	17	1	0	0	0	0	1	1	1	0	0	0	0	1	1	1	0	0	1	1	0	1	0	0
1400	Female	14	1	1	0	0	0	1	0	1	0	0	0	0	1	1	1	0	0	0	1	1	1	0	0
1401	Female	17	1	0	0	0	0	1	0	1	0	0	0	0	1	1	0	0	0	0	1	0	1	0	0
1402	Male	13	1	0	0	0	0	1	0	0	0	1	0	0	1	1	1	0	0	1	0	0	0	0	0
1403	Female	15	1	1	1	1	0	1	0	0	0	0	0	0	1	1	1	0	0	0	1	1	0	1	0
1404	Female	15	1	1	0	0	0	1	0	0	0	0	0	0	0	1	1	0	0	1	1	1	1	0	0
1405	Female	14	1	1	1	0	0	1	0	0	0	0	0	0	0	1	1	0	0	1	1	1	0	0	0
1406	Female	16	1	0	0	0	0	1	0	0	0	0	0	0	0	1	1	0	0	1	1	0	1	0	0
1407	Female	18	1	1	0	0	0	1	0	0	0	0	0	0	0	1	1	0	0	1	1	1	0	0	0
1408	Male	15	1	1	0	0	0	1	0	0	0	0	1	0	1	0	1	0	0	0	1	0	0	0	0
1409	Female	17	1	1	0	0	0	0	0	0	0	0	0	0	1	0	1	0	0	0	1	1	0	0	0
1410	Female	12	1	1	1	0	0	0	0	0	0	0	0	0	1	0	1	0	0	0	1	0	1	0	1
1411	Female	14	1	0	0	0	0	1	0	0	0	0	0	0	0	0	1	0	0	0	1	0	1	0	1
1412	Male	17	1	1	1	0	0	1	0	0	0	0	0	0	0	0	1	0	0	0	1	0	0	1	0
1413	Male	15	1	1	1	0	0	0	0	0	0	0	0	0	0	0	1	0	0	1	1	1	0	0	0
1414	Male	14	1	0	0	0	0	1	0	0	0	0	0	0	0	0	1	0	0	1	0	0	0	0	0
1415	Male	11	1	1	1	0	0	1	0	0	0	0	0	0	1	1	0	0	0	0	1	1	1	0	0
1416	Female	17	1	1	0	0	0	1	0	0	0	0	0	0	0	1	0	0	0	0	1	0	0	0	0
1417	Female	13	1	1	0	0	1	1	1	0	1	1	1	1	0	1	1	1	0	0	1	0	1	1	0
1418	Female	16	1	0	0	0	1	0	0	0	1	0	0	0	0	1	1	0	0	1	1	1	1	0	0
1419	Male	13	1	1	1	0	1	1	0	0	0	1	0	0	1	0	1	0	0	1	1	1	1	0	0
1420	Female	16	1	1	1	0	1	1	1	0	0	0	1	1	0	0	1	0	0	0	1	0	1	0	0
1421	Female	13	1	1	0	0	1	1	1	0	0	0	0	0	0	0	1	0	0	0	1	1	1	0	1
1422	Female	14	1	1	0	0	1	0	0	0	0	1	1	1	0	1	0	0	0	0	1	0	1	0	0
1423	Female	17	1	0	0	0	0	1	0	1	0	0	0	0	0	0	0	0	0	1	1	1	0	0	0
1424	Male	17	1	1	1	1	1	1	1	1	0	0	0	1	0	1	1	0	0	1	0	0	0	0	0
1425	Male	17	1	1	0	1	0	0	0	0	0	0	0	0	0	1	1	0	0	0	1	0	0	0	0
1426	Female	11	1	1	1	0	1	0	0	0	0	0	0	0	0	1	0	0	1	0	0	0	0	0	0
1427	Female	19	1	1	1	0	1	0	0	0	0	0	0	0	0	1	0	0	0	0	1	1	0	0	0
1428	Female	13	1	0	1	0	0	1	0	0	1	0	0	0	0	1	1	0	0	1	0	1	0	0	0
1429	Female	18	1	0	0	0	0	0	0	0	1	0	0	0	0	1	1	0	0	1	1	1	1	0	0
1430	Female	13	1	0	1	0	0	1	0	0	1	0	0	0	0	0	1	0	0	1	1	1	1	0	0
1431	Male	17	1	0	1	0	0	0	1	0	1	0	0	0	0	0	1	0	0	0	1	0	0	0	0
1432	Male	13	1	0	0	0	0	0	0	0	1	0	0	0	0	1	0	0	0	0	1	1	1	0	0
1433	Male	16	1	0	0	0	0	0	0	0	1	0	0	0	0	1	0	0	0	0	0	1	0	0	0
1434	Female	19	1	1	0	0	0	1	1	0	1	1	0	0	0	0	0	0	1	0	0	0	0	0	0
1435	Female	13	1	1	1	0	0	1	1	0	1	1	1	1	1	1	1	0	0	1	1	1	1	0	0
1436	Female	18	1	0	0	0	0	0	1	0	1	1	0	0	1	1	1	0	0	1	1	0	0	0	0
1437	Female	18	1	1	0	0	0	1	0	0	1	1	0	1	0	1	1	0	0	1	1	0	1	0	0
1438	Female	17	1	1	1	0	0	0	1	0	1	0	0	1	0	0	1	0	0	0	1	0	1	0	0
1439	Female	12	1	1	1	0	0	1	0	0	1	0	0	0	0	0	1	0	0	0	1	0	1	0	0
1440	Female	17	1	1	0	0	0	1	0	0	1	0	0	0	0	1	0	0	0	0	1	1	0	0	0
1441	Female	16	1	1	1	0	0	1	1	1	0	0	0	0	1	1	1	0	0	1	1	1	1	0	0
1442	Female	15	1	0	0	0	0	0	0	1	0	1	1	0	0	1	1	0	0	1	1	0	0	0	0
1443	Female	17	1	1	0	0	0	1	0	1	0	0	0	0	0	1	1	0	0	1	1	1	0	0	0
1444	Male	18	1	0	0	0	0	1	0	1	0	0	0	0	0	1	1	0	0	1	1	0	0	0	0
1445	Male	18	1	1	0	0	0	1	0	1	0	0	0	0	0	1	1	0	0	1	1	0	0	0	0
1446	Female	16	1	1	0	1	0	0	0	1	0	0	0	0	0	1	1	0	0	1	1	0	0	0	0
1447	Female	17	1	1	0	0	0	1	0	1	0	1	0	0	1	0	1	0	0	1	1	1	0	0	0
1448	Male	17	1	1	0	0	0	0	0	1	0	0	0	0	0	0	1	0	0	0	1	0	0	0	0
1449	Female	18	1	0	0	0	0	0	0	1	0	1	1	0	0	0	0	0	0	0	1	1	0	0	0
1450	Male	17	1	1	1	0	0	0	0	1	0	0	0	0	0	1	0	0	0	0	1	0	0	0	0
1451	Male	14	1	0	0	0	0	1	0	0	0	0	0	0	0	1	1	1	0	0	1	0	0	0	0
1452	Female	18	1	1	1	0	0	1	0	0	0	0	0	0	0	1	0	1	0	1	1	1	1	0	0
1453	Female	18	1	1	1	0	0	0	0	0	0	0	0	0	0	0	0	1	0	0	1	0	1	0	0
1454	Female	14	1	1	1	0	0	1	0	0	0	0	0	0	0	0	0	1	0	1	1	1	0	0	0
1455	Male	17	1	0	0	0	0	1	0	0	0	0	0	0	0	0	1	0	0	1	1	1	0	0	0
1456	Male	18	1	1	0	0	0	0	0	0	0	0	0	0	0	0	0	0	0	0	1	0	1	0	0
1457	Male	16	1	0	0	0	0	1	0	0	0	0	0	1	1	1	1	0	0	1	1	0	1	1	0
1458	Male	19	1	1	0	1	0	1	0	0	0	0	0	0	1	1	1	0	0	1	1	1	1	0	0
1459	Female	19	1	0	1	0	0	1	0	0	0	0	0	0	1	1	1	0	0	1	1	1	1	0	0
1460	Male	17	1	1	1	1	0	1	0	0	0	0	0	0	1	1	1	0	0	1	1	0	0	0	0
1461	Female	17	1	1	1	0	0	1	1	0	0	0	0	0	1	1	1	0	0	0	1	0	1	0	0
1462	Male	17	1	0	0	0	0	1	0	0	0	0	0	0	1	1	1	0	0	0	0	0	0	0	0
1463	Male	16	1	1	1	0	0	0	0	0	0	0	0	1	0	1	1	0	0	0	0	0	0	0	0
1464	Female	19	1	1	0	0	0	1	0	0	0	0	0	1	0	1	1	0	0	0	0	1	0	0	0
1465	Female	17	1	1	0	0	0	1	0	0	0	1	1	0	0	1	1	0	0	0	1	0	1	0	0
1466	Female	17	1	1	0	0	0	1	0	0	0	1	0	0	0	1	1	0	0	1	1	0	1	0	0
1467	Female	18	1	1	0	0	0	0	0	0	0	0	0	0	0	1	1	0	0	0	1	1	1	0	0
1468	Male	14	1	0	0	0	0	1	0	0	0	0	0	0	0	1	1	0	0	0	0	1	1	0	0
1469	Female	17	1	1	1	0	0	0	0	0	0	0	0	0	0	1	1	0	0	1	1	1	0	0	0
1470	Male	14	1	0	1	0	0	1	0	0	0	0	0	0	0	1	1	0	0	1	1	1	0	0	0
1471	Female	16	1	1	0	0	0	0	0	0	0	0	0	0	0	1	1	0	0	1	1	1	0	0	0
1472	Female	18	1	1	1	0	0	1	0	0	0	0	0	0	0	1	1	0	0	0	0	1	0	0	0
1473	Female	18	1	1	1	0	0	0	0	0	0	0	0	0	0	1	1	0	0	1	1	1	1	0	0
1474	Female	18	1	0	0	0	0	1	1	0	0	0	0	0	0	1	1	0	0	0	1	1	1	0	0
1475	Female	17	1	0	1	0	0	1	0	0	0	0	0	0	0	1	1	0	0	0	1	1	1	0	0
1476	Male	18	1	0	0	0	0	1	1	0	0	0	0	0	0	1	1	0	0	0	1	1	1	0	0
1477	Male	18	1	1	0	0	0	0	0	0	0	0	0	0	0	1	1	0	0	1	0	0	1	0	0
1478	Female	14	1	1	0	0	0	1	0	0	0	0	0	0	0	1	1	0	0	1	1	1	0	0	0
1479	Male	18	1	1	1	0	0	0	0	0	0	0	0	0	0	1	1	0	0	0	1	0	0	0	0
1480	Female	17	1	0	1	1	0	0	0	0	0	0	0	0	0	1	1	0	0	0	1	0	0	0	0
1481	Female	15	1	0	1	1	0	0	0	0	0	0	0	0	0	1	1	0	0	0	1	0	0	0	0
1482	Male	18	1	1	1	0	0	1	0	0	0	0	0	0	0	1	1	0	0	1	0	1	0	0	0
1483	Male	15	1	0	0	1	0	0	0	0	0	0	0	0	0	1	1	0	0	1	0	0	0	0	0
1484	Female	13	1	1	1	0	0	1	0	0	0	0	0	0	0	1	1	0	0	1	0	0	0	0	0
1485	Female	15	1	1	1	0	0	1	0	0	0	1	0	0	1	0	1	0	0	1	1	0	0	0	0
1486	Female	15	1	1	1	0	0	1	0	0	0	0	0	0	1	0	1	0	0	0	1	1	0	0	0
1487	Male	19	1	0	0	0	0	1	1	0	0	0	0	0	1	0	1	0	0	1	1	1	1	0	0
1488	Male	16	1	1	1	0	0	1	0	0	0	0	0	0	1	0	1	0	0	0	1	0	1	0	0
1489	Female	17	1	1	1	0	0	0	1	0	0	0	0	0	1	0	1	0	0	0	1	0	0	0	0
1490	Female	18	1	0	0	0	0	1	0	0	0	0	0	1	0	0	1	0	0	1	1	1	0	0	0
1491	Female	18	1	1	1	0	0	1	0	0	0	0	0	1	0	1	1	0	0	1	1	0	0	0	0
1492	Male	19	1	1	0	1	0	1	0	0	0	1	0	0	0	0	1	0	0	1	1	1	1	1	0
1493	Female	18	1	1	1	0	0	1	0	0	0	1	0	0	1	1	1	0	0	0	1	1	1	0	0
1494	Male	14	1	1	1	0	0	1	0	0	0	0	0	0	0	0	1	0	1	0	0	0	0	0	0
1495	Female	18	1	1	0	0	0	1	0	0	0	0	0	0	0	0	1	0	0	1	1	1	1	0	0
1496	Male	19	1	0	0	0	0	0	0	0	0	0	0	0	0	0	1	0	0	1	0	1	0	0	0
1497	Female	15	1	1	1	0	0	0	0	0	0	0	0	0	0	0	1	0	0	0	0	0	0	0	1
1498	Male	16	1	0	1	0	0	1	0	0	0	0	0	0	0	0	1	0	0	1	1	1	1	0	0
1499	Female	19	1	0	0	0	0	1	0	0	0	0	0	0	0	0	1	0	0	0	1	1	1	0	0
1500	Male	17	1	1	1	0	0	1	0	0	0	0	0	0	0	0	1	0	0	0	1	1	1	0	0
1501	Female	18	1	1	1	0	0	1	0	0	0	0	0	0	0	0	1	0	0	0	1	0	1	0	0
1502	Female	15	1	1	0	0	0	1	0	0	0	0	0	0	0	0	1	0	0	0	0	0	1	0	0
1503	Female	17	1	0	1	0	0	1	0	0	0	0	0	0	0	0	1	0	0	0	1	1	0	0	0
1504	Female	13	1	1	0	0	0	0	0	0	0	0	0	0	0	0	1	0	0	0	1	1	0	0	0
1505	Male	15	1	1	1	0	0	0	0	0	0	0	0	0	0	0	1	0	0	0	1	0	0	0	0
1506	Female	15	1	1	0	0	0	0	0	0	0	0	0	0	0	0	1	0	0	0	1	0	0	0	0
1507	Female	10	1	1	0	0	0	1	0	0	0	0	0	0	0	0	1	0	0	1	0	1	0	0	0
1508	Female	18	1	1	0	0	0	0	0	0	0	0	0	0	0	0	1	0	0	0	0	1	0	0	0
1509	Male	17	1	0	0	0	0	1	0	0	0	0	0	0	0	0	1	0	0	0	0	1	0	0	0
1510	Female	18	1	0	0	1	0	0	0	0	0	0	0	0	0	0	1	0	0	1	0	0	0	0	0
1511	Male	10	1	1	1	0	0	1	0	0	0	1	0	0	1	1	0	0	0	1	1	1	1	0	0
1512	Female	17	1	0	1	0	0	1	0	0	0	0	1	1	0	1	0	0	0	1	1	0	0	0	0
1513	Male	18	1	0	0	0	0	1	0	0	0	1	0	0	0	1	0	0	0	0	0	1	0	0	0
1514	Female	19	1	1	1	0	0	1	0	0	0	0	0	0	0	1	0	0	0	1	1	0	0	0	0
1515	Male	15	1	0	0	0	0	1	0	0	0	0	0	0	0	1	0	0	0	1	0	0	0	0	0
1516	Female	18	1	0	1	0	0	1	0	0	0	0	0	0	0	1	0	0	0	1	0	0	0	0	0
1517	Female	17	1	0	0	0	0	0	0	0	0	0	0	0	1	0	0	0	0	0	1	0	0	0	0
1518	Male	14	1	0	1	0	0	1	0	0	0	0	0	1	0	0	0	0	0	1	1	0	0	0	0
1519	Female	11	1	0	0	0	1	0	0	1	1	0	0	0	0	1	1	1	0	0	1	0	0	0	1
1520	Female	14	1	0	1	0	1	0	0	0	1	0	0	0	0	0	1	0	0	0	1	0	0	0	0
1521	Female	18	1	1	1	0	1	0	0	1	1	0	0	1	1	0	0	0	0	1	1	0	1	0	0
1522	Female	18	1	1	0	0	0	0	0	0	1	0	1	0	1	1	1	0	1	0	0	0	0	0	0
1523	Female	16	1	1	1	0	1	1	0	1	0	0	0	1	0	1	1	0	0	0	1	1	0	0	0
1524	Male	15	1	1	1	0	1	1	0	0	0	0	0	0	1	1	1	1	0	1	1	1	0	0	0
1525	Male	17	1	1	0	0	1	1	0	0	0	0	0	0	1	0	1	0	0	1	1	1	1	0	0
1526	Male	17	1	1	0	0	1	1	0	0	0	1	1	0	0	1	1	0	0	0	1	1	0	0	0
1527	Female	14	1	1	1	0	1	1	0	0	0	0	0	0	0	0	1	0	0	0	1	0	1	0	0
1528	Male	15	1	0	1	0	1	1	0	0	0	0	0	0	0	0	1	0	0	1	1	0	1	0	0
1529	Female	13	1	1	1	0	1	1	0	0	0	1	0	0	0	1	0	0	0	0	0	0	1	0	0
1530	Female	12	1	1	1	0	1	0	0	0	0	1	0	0	0	1	0	0	0	1	0	0	0	0	0
1531	Female	14	1	1	1	0	1	0	0	0	0	1	0	0	0	1	0	0	0	0	1	0	0	0	0
1532	Female	17	1	1	1	1	0	0	0	1	0	0	0	0	1	1	1	0	1	0	0	0	0	0	0
1533	Female	18	1	1	0	1	0	0	0	0	0	0	0	0	0	0	1	0	0	0	0	1	0	0	0
1534	Female	19	1	0	0	0	0	0	0	0	1	0	0	0	0	0	0	1	0	1	1	0	1	0	0
1535	Male	17	1	0	0	0	0	0	0	0	1	0	0	0	0	1	1	0	0	0	1	0	0	0	0
1536	Female	13	1	0	0	0	0	0	0	0	1	0	0	0	0	0	1	0	0	1	0	0	0	0	0
1537	Female	17	1	1	0	0	0	0	0	1	1	1	0	1	0	0	1	0	0	1	1	0	0	0	0
1538	Female	13	1	1	1	0	0	0	0	0	1	0	0	1	0	0	1	0	0	0	1	1	1	0	1
1539	Female	17	1	0	0	0	0	0	0	0	1	0	0	0	0	0	1	0	0	0	1	0	0	0	0
1540	Female	16	1	0	0	0	0	1	0	0	1	0	0	0	0	0	1	0	0	1	0	1	0	0	0
1541	Female	17	1	0	0	0	0	0	0	0	1	0	0	0	0	0	1	0	0	0	0	1	0	0	0
1542	Male	15	1	0	0	0	0	1	0	1	0	0	0	0	0	1	1	0	0	1	1	1	1	0	0
1543	Male	17	1	0	0	0	0	1	1	1	0	0	0	0	0	1	0	0	0	1	1	0	0	0	0
1544	Female	13	1	1	1	0	0	1	0	0	0	1	0	0	1	0	1	1	0	1	1	1	0	0	1
1545	Female	18	1	0	0	1	0	1	0	0	0	0	0	0	0	0	0	0	0	1	1	0	0	0	0
1546	Female	13	1	0	1	0	0	1	0	0	0	0	0	0	1	1	1	0	0	0	1	0	0	0	0
1547	Male	19	1	0	0	0	0	0	0	0	0	0	0	0	0	1	1	0	0	1	1	0	0	0	0
1548	Female	17	1	1	0	0	0	1	0	0	0	0	0	1	1	0	1	0	0	0	1	1	1	0	0
1549	Male	15	1	0	0	0	0	1	0	0	0	0	0	0	1	0	1	0	0	0	1	0	0	0	0
1550	Male	18	1	0	0	0	0	1	0	0	0	0	0	1	0	0	1	0	0	1	1	1	1	0	0
1551	Male	15	1	0	0	0	0	1	0	0	0	1	0	0	0	0	1	0	0	0	0	0	0	0	1
1552	Male	13	1	0	0	0	0	1	0	0	0	1	0	0	0	0	1	0	0	1	1	0	0	0	0
1553	Female	16	1	1	1	0	0	1	0	0	0	0	0	0	0	0	1	0	0	0	1	0	1	0	0
1554	Female	14	1	0	0	0	0	1	0	0	0	0	0	0	0	0	1	0	0	0	0	0	0	0	1
1555	Male	18	1	0	1	0	0	0	0	0	0	0	0	0	0	0	1	0	0	0	1	0	0	0	0
1556	Male	12	1	1	0	0	0	1	0	0	0	0	0	0	0	0	1	0	0	1	1	1	1	0	1
1557	Female	17	1	1	0	0	0	1	0	0	0	0	0	0	0	0	1	0	0	0	1	1	0	0	1
1558	Female	18	1	1	0	0	0	0	0	0	0	0	0	0	0	0	1	0	0	0	1	1	1	0	0
1559	Female	18	1	1	0	0	0	0	0	0	0	0	0	0	0	0	1	0	0	0	1	0	1	0	0
1560	Female	15	1	1	0	0	0	1	0	0	0	0	0	0	0	0	1	0	0	0	1	0	1	0	0
1561	Female	13	1	1	1	0	0	0	0	0	0	0	0	0	0	0	1	0	0	0	1	0	1	0	0
1562	Male	14	1	1	0	0	0	0	0	0	0	0	0	0	0	0	1	0	0	0	1	0	1	0	0
1563	Female	12	1	1	0	0	0	0	0	0	0	0	0	0	0	0	1	0	0	0	0	0	1	0	0
1564	Male	14	1	1	0	0	0	0	0	0	0	0	0	0	0	0	1	0	0	0	1	1	0	0	0
1565	Female	19	1	0	0	0	0	0	0	0	0	0	0	0	0	0	1	0	0	1	1	0	0	0	0
1566	Male	14	1	1	0	0	0	0	0	0	0	0	0	0	0	0	1	0	0	0	1	0	0	0	0
1567	Female	16	1	1	0	0	0	0	0	0	0	0	0	0	0	0	1	0	0	0	1	0	0	0	0
1568	Female	17	1	0	0	1	0	0	0	0	0	0	0	0	0	0	1	0	0	1	0	1	0	0	0
1569	Female	18	1	0	0	0	0	1	1	0	0	0	0	0	0	0	1	0	0	0	0	1	0	0	0
1570	Female	11	1	0	0	0	0	1	0	0	0	0	0	0	0	0	1	0	1	0	0	0	0	0	0
1571	Female	14	1	1	0	0	0	1	0	0	0	0	0	0	0	1	0	0	0	1	0	0	0	0	0
1572	Female	19	1	0	0	0	0	1	0	0	0	0	0	1	0	0	0	0	0	1	1	1	1	0	0
1573	Female	18	1	0	1	0	1	1	0	0	1	0	0	0	0	0	0	0	0	1	1	0	0	0	0
1574	Female	17	1	1	0	0	1	0	0	0	1	0	0	0	0	0	1	0	0	0	0	0	0	0	0
1575	Male	12	1	0	0	1	1	0	0	0	0	0	0	0	0	0	1	0	0	1	1	0	0	0	0
1576	Male	11	1	1	0	0	1	0	0	0	0	0	0	0	0	0	1	0	0	1	1	0	0	0	0
1577	Female	17	1	1	0	0	1	0	0	0	0	1	0	0	0	1	0	0	0	0	0	0	0	0	0
1578	Male	15	1	0	0	0	0	1	0	0	0	0	0	0	0	1	0	0	0	0	0	0	1	0	0
1579	Female	18	1	1	0	0	0	1	0	0	0	0	0	0	1	1	0	0	0	1	1	1	0	0	0
1580	Male	15	1	0	1	1	1	0	0	0	0	0	1	0	0	0	1	0	1	0	0	0	0	0	0
1581	Female	18	1	1	0	0	0	0	0	0	0	1	0	0	0	0	1	0	0	0	0	1	0	0	0
1582	Male	13	1	1	0	0	0	0	0	0	0	1	0	0	1	0	0	0	1	0	0	0	0	0	0
1583	Male	14	1	0	1	0	0	0	0	0	1	0	0	0	0	1	0	1	0	1	1	0	0	0	0
1584	Male	15	1	0	0	0	0	0	0	0	1	0	0	0	0	0	0	1	1	0	0	0	0	0	0
1585	Male	16	1	0	0	0	0	0	0	0	1	0	0	0	0	0	0	1	1	0	0	0	0	0	0
1586	Male	14	1	0	1	0	0	0	0	0	1	0	0	0	0	0	0	1	0	0	0	0	0	0	1
1587	Female	15	1	0	0	0	0	0	0	0	1	0	0	0	0	0	0	1	0	1	1	1	0	0	0
1588	Male	13	1	0	0	0	0	0	0	0	1	0	0	0	0	0	0	1	1	0	0	0	0	0	0
1589	Female	14	1	1	1	0	0	0	0	0	1	1	0	0	0	0	0	0	0	0	1	0	0	0	0
1590	Male	17	1	0	0	0	0	0	0	0	1	1	0	0	0	0	0	0	0	1	0	0	0	0	0
1591	Male	11	1	0	0	0	0	0	0	0	1	1	0	0	0	0	0	0	1	0	0	0	0	0	0
1592	Male	18	1	0	0	0	0	0	0	0	1	1	0	1	1	1	1	0	0	1	1	0	1	0	0
1593	Female	14	1	0	0	0	0	0	0	0	1	1	0	0	1	1	1	0	1	0	0	0	0	0	0
1594	Male	18	1	1	0	0	0	1	0	0	1	0	0	1	0	1	1	0	0	1	0	1	0	0	0
1595	Male	15	1	0	0	0	0	0	0	0	1	1	0	0	0	1	1	0	1	0	0	0	0	0	0
1596	Male	19	1	0	0	0	0	1	0	0	1	1	0	0	0	1	1	0	0	1	1	1	1	0	0
1597	Male	18	1	0	0	0	0	1	0	0	1	1	0	0	0	1	1	0	0	1	0	1	0	0	0
1598	Male	15	1	0	0	0	0	0	0	0	1	0	0	0	0	1	1	0	0	0	0	1	1	0	0
1599	Male	16	1	0	0	0	0	0	0	0	1	0	0	0	0	1	1	0	0	1	1	0	0	0	0
1600	Male	17	1	0	0	1	0	0	0	0	1	1	0	0	1	0	1	0	0	1	1	0	0	0	0
1601	Male	18	1	0	0	0	0	0	0	0	1	1	0	0	0	0	1	0	0	1	1	1	1	0	0
1602	Female	14	1	0	0	0	0	0	0	0	1	1	0	0	0	0	1	0	0	1	0	0	0	0	0
1603	Female	14	1	0	0	0	0	0	0	0	1	0	0	0	0	0	1	0	0	0	0	1	0	0	0
1604	Female	17	1	1	1	0	0	0	0	0	1	0	0	0	0	0	1	0	0	1	1	0	1	0	0
1605	Male	17	1	0	0	0	0	0	0	0	1	0	0	0	0	0	1	0	0	1	1	1	1	0	0
1606	Male	17	1	0	0	0	0	0	0	0	1	0	0	0	0	0	1	0	0	0	0	0	1	0	0
1607	Male	17	1	0	0	0	0	0	0	0	1	0	0	0	0	0	1	0	0	0	1	1	0	0	0
1608	Male	13	1	0	0	0	0	1	0	0	1	0	0	0	0	0	1	0	0	0	1	0	0	0	0
1609	Female	17	1	0	0	0	0	0	0	0	1	0	0	0	0	0	1	0	0	1	0	1	0	0	0
1610	Male	15	1	0	1	0	0	0	0	0	1	0	0	0	0	0	1	0	0	0	0	1	0	0	0
1611	Female	17	1	0	0	0	0	0	0	0	1	0	0	0	0	0	1	0	0	1	0	0	0	0	0
1612	Male	17	1	0	0	0	0	0	0	0	1	0	0	0	0	0	1	0	0	1	0	0	0	0	0
1613	Male	16	1	0	0	0	0	0	0	0	1	0	0	0	0	1	0	0	1	0	0	0	0	0	0
1614	Male	17	1	1	0	0	0	0	0	0	1	0	0	1	0	0	0	0	0	0	1	1	1	0	0
1615	Male	18	1	0	1	0	0	0	0	0	1	0	0	1	0	0	0	0	0	1	1	0	1	0	0
1616	Male	16	1	0	0	0	0	0	0	0	1	0	0	1	0	0	0	0	0	1	0	1	0	0	0
1617	Female	16	1	0	0	0	0	1	0	0	1	1	1	0	0	1	1	1	0	1	1	1	1	0	0
1618	Female	17	1	0	0	0	0	0	0	0	1	0	0	0	0	0	0	0	1	0	0	0	0	0	0
1619	Female	14	1	1	0	0	0	0	0	0	1	1	1	0	1	1	1	0	0	1	1	1	0	0	0
1620	Female	15	1	1	1	0	0	0	0	0	1	0	0	0	1	1	1	0	0	0	1	0	1	0	0
1621	Female	18	1	0	0	1	0	1	0	0	1	0	0	0	1	1	1	0	0	1	1	1	1	0	0
1622	Female	17	1	0	0	0	0	1	0	0	1	0	0	0	0	1	1	0	0	1	0	1	1	0	0
1623	Female	17	1	0	1	0	0	0	1	0	1	0	0	0	0	1	1	0	0	1	0	0	1	0	0
1624	Female	18	1	0	0	0	0	0	1	0	1	0	0	0	0	0	1	0	0	0	1	0	1	0	0
1625	Female	16	1	1	1	0	0	0	0	0	1	0	0	0	0	0	1	0	0	1	1	0	0	0	0
1626	Female	19	1	1	0	0	0	0	0	0	1	0	0	0	0	0	1	0	0	1	1	0	0	0	0
1627	Male	19	1	0	0	0	0	0	1	0	1	0	0	0	0	0	1	0	0	0	0	1	0	0	0
1628	Female	17	1	0	0	0	0	0	0	0	1	0	0	0	0	0	1	0	0	0	0	1	0	0	0
1629	Female	17	1	0	1	0	0	0	0	0	1	0	0	0	0	0	1	0	0	0	0	0	0	0	0
1630	Female	17	1	1	0	0	0	1	0	0	1	0	0	0	0	0	1	0	1	0	0	0	0	0	0
1631	Female	18	1	0	1	0	0	1	0	0	1	0	0	0	1	1	0	0	0	1	1	1	0	0	0
1632	Female	17	1	0	1	0	0	1	0	0	1	0	0	0	1	1	0	0	0	1	1	0	0	0	0
1633	Female	17	1	1	0	0	0	0	0	0	1	0	0	1	0	0	0	0	0	1	1	1	0	0	0
1634	Female	14	1	0	0	0	0	0	0	0	1	0	0	1	0	0	0	0	0	0	1	0	0	0	0
1635	Male	14	1	0	1	0	0	1	0	1	0	0	0	0	0	1	0	1	0	0	1	0	1	0	0
1636	Male	15	1	0	1	0	0	0	0	1	0	0	0	0	0	0	0	0	0	0	1	0	0	0	0
1637	Male	14	1	0	1	0	0	1	1	1	0	1	1	0	1	1	1	0	0	1	1	0	1	1	0
1638	Female	17	1	1	0	0	0	1	0	1	0	1	0	1	0	1	1	0	0	1	1	0	0	0	0
1639	Female	17	1	0	0	0	0	0	1	1	0	0	1	0	0	1	1	0	0	1	0	0	0	0	0
1640	Female	17	1	0	0	0	0	0	0	1	0	1	0	0	0	1	1	0	0	1	1	1	1	0	0
1641	Male	14	1	1	0	0	0	0	0	1	0	0	0	0	0	1	1	0	0	0	1	0	0	0	0
1642	Male	15	1	0	0	0	0	0	0	1	0	0	0	0	0	1	1	0	0	0	1	0	1	1	0
1643	Female	17	1	1	1	0	0	1	0	1	0	0	0	0	0	1	1	0	0	1	1	1	1	0	0
1644	Female	14	1	0	0	0	0	1	0	1	0	0	0	0	0	1	1	0	0	1	1	1	1	0	0
1645	Male	19	1	0	0	0	0	0	0	1	0	0	0	0	0	1	1	0	0	1	0	0	0	0	0
1646	Male	19	1	0	0	0	0	0	0	1	0	0	0	0	1	0	1	0	0	0	0	0	1	0	0
1647	Female	14	1	1	0	0	0	0	0	1	0	1	0	1	0	0	1	0	0	0	1	0	0	0	0
1648	Male	19	1	0	0	0	0	1	0	1	0	0	0	1	0	0	1	0	0	1	0	0	0	0	0
1649	Male	19	1	0	0	0	0	0	0	1	0	0	0	0	0	0	1	0	0	0	0	0	0	1	0
1650	Male	17	1	0	0	0	0	0	1	1	0	0	0	0	0	0	1	0	0	0	1	0	1	1	0
1651	Male	18	1	1	0	0	0	0	0	1	0	0	0	0	0	0	1	0	0	1	1	0	1	0	0
1652	Female	18	1	0	0	0	0	0	0	1	0	0	0	0	0	0	1	0	0	0	0	0	0	0	0
1653	Female	19	1	1	0	0	0	1	0	1	0	0	0	0	1	1	0	0	0	1	1	1	0	0	0
1654	Male	16	1	0	0	0	0	0	0	1	0	0	0	0	1	1	0	0	0	1	0	1	0	0	0
1655	Male	17	1	0	0	0	0	0	0	1	0	0	0	0	0	1	0	0	0	0	0	0	0	0	0
1656	Female	10	1	1	0	0	0	0	0	1	0	1	0	0	1	1	0	0	0	0	0	0	0	1	0
1657	Female	13	1	0	1	0	0	1	0	0	0	0	0	0	0	0	0	1	0	1	1	0	0	0	0
1658	Female	15	1	1	0	0	0	0	0	0	0	0	0	0	0	0	0	1	0	1	1	0	0	0	0
1659	Female	19	1	0	0	1	0	0	0	0	0	0	0	0	0	1	1	1	0	0	0	0	0	0	1
1660	Male	15	1	1	0	0	0	0	0	0	0	0	0	0	0	1	1	1	0	1	1	0	1	0	0
1661	Female	14	1	0	0	0	0	1	0	0	0	0	0	0	0	0	1	1	0	1	0	0	1	0	0
1662	Male	17	1	1	0	0	0	0	0	0	0	1	0	0	1	1	0	1	0	1	0	0	0	0	0
1663	Female	17	1	1	0	0	0	0	0	0	0	0	0	0	0	0	0	1	0	1	1	0	0	0	0
1664	Male	14	1	1	1	0	0	0	0	0	0	0	0	0	0	0	0	1	0	0	0	1	0	0	0
1665	Male	17	1	0	0	0	0	1	0	0	0	0	0	0	0	0	0	1	0	0	1	0	0	0	0
1666	Male	18	1	1	0	0	0	0	0	0	0	0	0	0	0	0	0	1	0	1	0	1	0	0	0
1667	Male	14	1	1	0	0	0	0	0	0	0	0	0	0	0	0	0	1	1	0	0	0	0	0	0
1668	Male	18	1	0	0	0	0	1	0	0	0	0	0	0	0	0	1	0	0	1	0	1	0	0	0
1669	Male	14	1	0	1	0	0	0	1	0	0	0	0	0	1	0	0	0	0	0	0	0	0	0	0
1670	Female	17	1	0	0	0	0	1	0	0	0	1	0	0	0	0	0	0	0	0	1	0	0	0	0
1671	Male	17	1	1	0	0	0	0	0	0	0	0	0	0	0	0	0	0	0	0	0	0	0	0	0
1672	Male	13	1	0	0	0	0	1	0	0	0	0	0	0	0	0	0	0	0	0	0	0	0	1	0
1673	Male	16	1	0	0	0	0	0	0	0	0	0	0	0	0	0	0	0	0	1	1	1	0	0	0
1674	Male	18	1	1	1	0	0	1	0	0	0	0	0	0	0	0	0	0	0	0	1	1	0	0	0
1675	Male	14	1	0	0	0	0	1	0	0	0	0	0	0	0	0	0	0	0	0	1	0	0	0	0
1676	Male	14	1	0	1	0	0	1	0	0	0	0	0	0	0	0	0	0	0	0	1	0	0	0	0
1677	Male	19	1	0	1	0	0	1	0	0	0	0	0	0	0	0	0	0	0	0	1	0	0	0	0
1678	Female	16	1	0	1	0	0	1	0	0	0	0	0	0	0	0	0	0	0	0	1	0	0	0	0
1679	Female	17	1	1	1	0	0	0	0	0	0	0	0	0	0	0	0	0	0	0	1	0	0	0	0
1680	Male	14	1	1	0	0	0	0	0	0	0	0	0	0	0	0	0	0	0	0	1	0	0	0	0
1681	Male	17	1	1	1	0	0	0	0	0	0	0	0	0	0	0	0	0	0	0	1	0	0	0	0
1682	Female	17	1	1	1	0	0	0	0	0	0	0	0	0	0	0	0	0	0	0	0	1	0	0	0
1683	Male	19	1	0	0	1	0	0	0	0	0	0	0	0	0	0	0	0	0	0	0	0	0	0	0
1684	Female	15	1	1	1	0	0	0	0	0	0	0	0	0	0	0	0	0	0	0	0	0	0	0	0
1685	Male	16	1	0	0	0	0	1	0	0	0	0	0	0	0	0	0	0	1	0	0	0	0	0	0
1686	Female	13	1	1	0	0	0	0	0	0	0	0	0	0	0	0	0	0	1	0	0	0	0	0	0
1687	Male	17	1	0	0	0	0	1	0	0	0	0	0	0	1	1	1	0	0	1	0	1	1	1	0
1688	Male	14	1	1	1	0	0	1	0	0	0	0	0	0	1	1	1	0	0	1	1	1	1	0	0
1689	Male	12	1	1	1	0	0	1	0	0	0	0	0	0	1	1	1	0	0	1	1	1	1	0	0
1690	Male	18	1	1	0	1	0	0	0	0	0	0	0	0	1	1	1	0	0	1	1	1	1	0	0
1691	Female	17	1	1	1	0	0	1	0	0	0	0	0	0	1	1	1	0	0	0	1	0	1	0	0
1692	Male	17	1	1	0	0	0	1	0	0	0	0	0	0	1	1	1	0	0	1	0	0	1	0	0
1693	Female	19	1	0	0	0	0	1	0	0	0	0	0	0	1	1	1	0	0	0	0	0	1	0	0
1694	Male	19	1	1	0	1	0	0	0	0	0	0	0	0	1	1	1	0	0	1	1	1	0	0	0
1695	Female	17	1	1	1	0	0	1	0	0	0	0	0	0	1	1	1	0	0	1	1	1	0	0	0
1696	Male	18	1	1	1	1	0	0	1	0	0	0	0	0	1	1	1	0	0	1	1	0	0	0	0
1697	Male	18	1	1	0	0	0	1	0	0	0	0	0	0	1	1	1	0	0	0	0	1	0	0	0
1698	Female	18	1	1	1	0	0	0	0	0	0	1	0	1	0	1	1	0	0	1	1	0	0	0	0
1699	Female	18	1	1	0	0	0	1	0	0	0	0	0	1	0	1	1	0	0	1	1	1	1	0	0
1700	Male	18	1	0	0	1	0	1	0	0	0	0	0	1	0	1	1	0	0	1	1	1	1	0	0
1701	Female	18	1	1	0	0	0	0	0	0	0	0	0	1	0	1	1	0	0	1	1	1	0	0	0
1702	Female	17	1	1	0	0	0	0	0	0	0	0	0	1	0	1	1	0	0	1	1	1	0	0	0
1703	Female	17	1	0	0	0	0	1	0	0	0	0	0	1	0	1	1	0	0	1	1	0	0	0	0
1704	Male	17	1	0	0	0	0	0	0	0	0	0	0	1	0	1	1	0	0	1	1	0	0	0	0
1705	Male	14	1	1	0	0	0	1	0	0	0	1	1	0	0	1	1	0	0	0	1	0	0	1	0
1706	Male	15	1	0	0	0	0	1	0	0	0	1	1	0	0	1	1	0	0	1	0	1	0	0	0
1707	Male	14	1	1	1	0	0	0	0	0	0	1	0	0	0	1	1	0	0	1	0	1	0	0	0
1708	Female	17	1	1	0	0	0	1	0	0	0	1	0	0	0	1	1	0	0	0	0	0	1	0	0
1709	Male	15	1	1	0	0	0	0	0	0	0	1	0	0	0	1	1	0	0	0	1	0	0	0	0
1710	Male	14	1	1	0	0	0	1	0	0	0	1	0	0	0	1	1	0	0	1	0	1	0	0	0
1711	Male	18	1	1	0	0	0	0	0	0	0	1	0	0	0	1	1	0	0	0	0	1	0	0	0
1712	Male	14	1	1	1	0	0	0	0	0	0	1	0	0	0	1	1	0	0	1	0	0	0	0	0
1713	Male	17	1	0	0	0	0	1	0	0	0	0	0	0	0	1	1	0	0	1	1	1	0	0	0
1714	Male	16	1	1	0	0	0	1	0	0	0	0	0	0	0	1	1	0	0	1	1	0	1	0	0
1715	Female	14	1	1	0	0	0	1	1	0	0	0	0	0	0	1	1	0	0	1	1	0	1	0	0
1716	Male	19	1	1	0	1	0	1	0	0	0	0	0	0	0	1	1	0	0	1	1	0	0	0	0
1717	Male	14	1	0	0	1	0	0	0	0	0	0	0	0	0	1	1	0	0	0	1	0	0	0	0
1718	Female	16	1	1	0	0	0	0	0	0	0	0	0	0	0	1	1	0	0	0	1	1	1	1	0
1719	Male	17	1	0	1	0	0	1	0	0	0	0	0	0	0	1	1	0	0	1	1	1	1	0	0
1720	Female	18	1	1	0	0	0	0	0	0	0	0	0	0	0	1	1	0	0	1	1	1	1	0	0
1721	Male	18	1	1	0	0	0	0	0	0	0	0	0	0	0	1	1	0	0	1	1	1	1	0	0
1722	Female	12	1	1	1	0	0	0	0	0	0	0	0	0	0	1	1	0	0	1	1	1	1	0	0
1723	Male	14	1	1	0	0	0	0	0	0	0	0	0	0	0	1	1	0	0	0	1	1	1	0	0
1724	Male	18	1	0	0	0	0	1	0	0	0	0	0	0	0	1	1	0	0	1	1	0	1	0	0
1725	Male	17	1	1	0	0	0	1	0	0	0	0	0	0	0	1	1	0	0	1	0	1	1	0	0
1726	Male	19	1	0	0	0	0	1	0	0	0	0	0	0	0	1	1	0	0	1	0	1	1	0	0
1727	Female	17	1	0	1	0	0	1	0	0	0	0	0	0	0	1	1	0	0	1	0	0	1	0	0
1728	Female	17	1	0	0	0	0	1	0	0	0	0	0	0	0	1	1	0	0	1	1	1	0	0	0
1729	Female	19	1	1	1	0	0	1	0	0	0	0	0	0	0	1	1	0	0	1	1	1	0	0	0
1730	Female	17	1	1	0	0	0	0	0	0	0	0	0	0	0	1	1	0	0	0	1	1	0	0	0
1731	Female	13	1	1	0	0	0	0	0	0	0	0	0	0	0	1	1	0	0	0	1	1	0	0	0
1732	Female	17	1	0	1	0	0	0	1	0	0	0	0	0	0	1	1	0	0	0	1	1	0	0	0
1733	Male	14	1	0	0	0	0	0	1	0	0	0	0	0	0	1	1	0	0	1	1	0	0	0	0
1734	Male	14	1	0	0	1	0	0	0	0	0	0	0	0	0	1	1	0	0	1	1	0	0	0	0
1735	Female	19	1	0	0	0	0	1	0	0	0	0	0	0	0	1	1	0	0	1	1	0	0	0	0
1736	Female	17	1	1	1	0	0	1	0	0	0	0	0	0	0	1	1	0	0	1	1	0	0	0	0
1737	Male	16	1	1	0	0	0	0	0	0	0	0	0	0	0	1	1	0	0	1	1	0	0	0	0
1738	Female	17	1	1	1	1	0	0	0	0	0	0	0	0	0	1	1	0	0	1	1	0	0	0	0
1739	Female	11	1	0	1	0	0	1	1	0	0	0	0	0	0	1	1	0	0	0	1	0	0	0	0
1740	Female	14	1	0	1	0	0	1	0	0	0	0	0	0	0	1	1	0	0	0	1	0	0	0	0
1741	Male	14	1	0	0	0	0	0	0	0	0	0	0	0	0	1	1	0	0	0	1	0	0	0	0
1742	Female	17	1	1	0	0	0	0	0	0	0	0	0	0	0	1	1	0	0	0	1	0	0	0	0
1743	Male	14	1	0	0	1	0	0	0	0	0	0	0	0	0	1	1	0	0	0	1	0	0	0	0
1744	Male	14	1	1	1	0	0	1	0	0	0	0	0	0	0	1	1	0	0	1	0	1	0	0	0
1745	Male	19	1	0	0	0	0	0	0	0	0	0	0	0	0	1	1	0	0	1	0	1	0	0	0
1746	Male	18	1	1	0	0	0	0	0	0	0	0	0	0	0	1	1	0	0	1	0	1	0	0	0
1747	Female	14	1	0	0	0	0	1	0	0	0	0	0	0	0	1	1	0	0	1	0	1	0	0	0
1748	Female	17	1	1	0	0	0	0	0	0	0	0	0	0	0	1	1	0	0	0	0	1	0	0	0
1749	Male	17	1	1	0	0	0	0	0	0	0	0	0	0	0	1	1	0	0	1	0	0	0	0	0
1750	Female	19	1	1	0	0	0	0	0	0	0	0	0	0	0	1	1	0	0	1	0	0	0	0	0
1751	Male	18	1	0	1	0	0	0	0	0	0	0	0	0	0	1	1	0	0	1	0	0	0	0	0
1752	Male	16	1	0	0	0	0	1	0	0	0	0	0	0	0	1	1	0	0	0	0	0	0	0	0
1753	Male	19	1	1	0	0	0	0	0	0	0	0	0	0	0	1	1	0	1	0	0	0	0	0	0
1754	Female	10	1	1	0	0	0	0	0	0	0	0	0	0	0	1	1	0	0	1	1	1	1	0	0
1755	Male	19	1	1	0	0	0	1	0	0	0	0	0	1	1	0	1	0	0	0	0	1	0	0	0
1756	Female	17	1	1	0	0	0	0	0	0	0	0	0	0	1	0	1	0	0	1	1	1	0	0	0
1757	Male	11	1	1	0	0	0	0	0	0	0	0	0	0	1	0	1	0	0	0	1	0	0	0	0
1758	Male	18	1	0	0	0	0	0	0	0	0	0	0	0	1	0	1	0	0	0	1	1	1	0	0
1759	Male	17	1	1	1	0	0	0	0	0	0	0	0	0	1	0	1	0	0	1	1	0	1	0	0
1760	Male	14	1	0	0	0	0	1	0	0	0	0	0	0	1	0	1	0	0	0	1	1	0	0	0
1761	Female	18	1	0	0	0	0	0	0	0	0	0	0	0	1	0	1	0	0	0	1	1	0	0	0
1762	Female	14	1	0	0	0	0	0	0	0	0	0	0	0	1	0	1	0	0	0	1	1	0	0	0
1763	Female	14	1	1	1	0	0	0	0	0	0	0	0	0	1	0	1	0	0	0	1	1	0	0	0
1764	Female	17	1	1	1	0	0	0	0	0	0	0	0	0	1	0	1	0	0	0	1	0	0	0	0
1765	Female	17	1	1	1	0	0	0	0	0	0	0	0	0	1	0	1	0	0	0	1	0	0	0	0
1766	Male	16	1	0	0	0	0	0	0	0	0	0	0	0	1	0	1	0	0	1	0	1	0	0	0
1767	Female	14	1	0	0	0	0	1	1	0	0	0	0	0	1	0	1	0	0	0	0	1	0	0	0
1768	Female	14	1	1	1	0	0	0	0	0	0	1	1	1	0	0	1	0	1	0	0	0	0	0	0
1769	Male	16	1	1	0	0	0	0	0	0	0	0	0	1	0	0	1	0	0	0	0	1	1	0	0
1770	Female	13	1	1	0	0	0	1	0	0	0	0	0	1	0	0	1	0	0	0	1	1	0	0	0
1771	Female	19	1	1	0	0	0	1	0	0	0	0	0	1	0	0	1	0	0	1	0	1	1	0	0
1772	Female	16	1	0	1	0	0	1	0	0	0	0	0	1	0	0	1	0	0	1	1	1	0	0	0
1773	Female	19	1	1	0	0	0	0	0	0	0	0	0	1	0	0	1	0	0	1	0	1	0	0	0
1774	Male	18	1	1	0	0	0	1	1	0	0	1	1	0	0	0	1	0	0	1	1	0	0	0	0
1775	Female	15	1	1	0	0	0	1	0	0	0	1	0	0	0	0	1	0	0	0	1	1	1	0	0
1776	Male	15	1	1	1	0	0	0	0	0	0	1	0	0	0	0	1	0	0	0	1	0	0	0	0
1777	Male	17	1	0	0	0	0	1	0	0	0	1	0	0	0	0	1	0	0	0	1	0	0	0	0
1778	Male	17	1	0	0	0	0	1	0	0	0	1	0	0	0	0	1	0	0	0	1	0	0	0	0
1779	Female	12	1	1	1	0	0	0	0	0	0	1	0	0	0	0	1	0	0	0	1	0	0	0	0
1780	Male	17	1	0	0	0	0	0	0	0	0	1	0	0	0	0	1	0	0	0	0	1	0	0	0
1781	Female	14	1	1	1	0	0	0	0	0	0	1	0	0	0	0	1	0	0	1	0	0	0	0	0
1782	Male	17	1	1	0	0	0	0	0	0	0	1	0	0	0	0	1	0	0	1	0	0	0	0	0
1783	Male	17	1	1	0	0	0	0	0	0	0	1	0	0	0	0	1	0	0	1	0	0	0	0	0
1784	Female	18	1	1	0	0	0	0	0	0	0	1	0	0	0	0	1	0	0	0	0	0	0	0	0
1785	Female	15	1	1	0	0	0	1	0	0	0	0	0	0	0	0	1	0	0	1	1	1	1	0	0
1786	Male	17	1	0	0	0	0	0	0	0	0	0	0	0	0	0	1	0	0	1	1	0	1	0	0
1787	Male	18	1	0	0	1	0	1	0	0	0	0	0	0	0	0	1	0	0	1	0	1	0	0	0
1788	Female	14	1	1	0	0	0	1	0	0	0	0	0	0	0	0	1	0	0	0	1	0	1	0	0
1789	Female	14	1	1	0	0	0	0	0	0	0	0	0	0	0	0	1	0	0	0	1	1	0	0	0
1790	Male	14	1	0	0	1	0	0	0	0	0	0	0	0	0	0	1	0	0	0	1	0	0	0	0
1791	Female	12	1	1	0	0	0	0	0	0	0	0	0	0	0	0	1	0	0	0	1	0	0	0	0
1792	Female	12	1	1	0	0	0	0	0	0	0	0	0	0	0	0	1	0	0	0	1	0	0	0	0
1793	Male	18	1	1	0	0	0	1	0	0	0	0	0	0	0	0	1	0	0	1	1	1	1	0	0
1794	Female	10	1	0	0	0	0	1	0	0	0	0	0	0	0	0	1	0	0	0	0	0	0	0	1
1795	Male	18	1	1	0	0	0	0	0	0	0	0	0	0	0	0	1	0	0	1	1	1	1	1	0
1796	Male	19	1	0	0	0	0	1	0	0	0	0	0	0	0	0	1	0	0	0	1	1	0	1	0
1797	Male	14	1	1	1	0	0	0	0	0	0	0	0	0	0	0	1	0	0	0	0	0	0	1	0
1798	Male	17	1	0	0	1	0	0	0	0	0	0	0	0	0	0	1	0	0	0	0	0	0	1	0
1799	Male	19	1	0	0	0	0	1	0	0	0	0	0	0	0	0	1	0	0	1	1	1	1	0	0
1800	Female	18	1	0	0	0	0	1	0	0	0	0	0	0	0	0	1	0	0	0	1	1	1	0	0
1801	Female	19	1	1	0	0	0	0	0	0	0	0	0	0	0	0	1	0	0	0	1	1	1	0	0
1802	Female	19	1	0	1	0	0	0	1	0	0	0	0	0	0	0	1	0	0	0	1	0	1	0	0
1803	Male	18	1	0	0	0	0	0	0	0	0	0	0	0	0	0	1	0	0	0	1	0	1	0	0
1804	Male	12	1	0	0	0	0	1	0	0	0	0	0	0	0	0	1	0	0	0	1	0	1	0	0
1805	Male	14	1	1	0	0	0	0	0	0	0	0	0	0	0	0	1	0	0	0	1	0	1	0	0
1806	Female	17	1	0	0	0	0	1	0	0	0	0	0	0	0	0	1	0	0	0	1	0	1	0	0
1807	Male	17	1	0	0	0	0	1	0	0	0	0	0	0	0	0	1	0	0	1	0	0	1	0	0
1808	Male	17	1	0	1	0	0	0	0	0	0	0	0	0	0	0	1	0	0	1	0	0	1	0	0
1809	Male	15	1	1	1	0	0	0	0	0	0	0	0	0	0	0	1	0	0	0	0	0	1	0	0
1810	Male	18	1	0	1	0	0	0	0	0	0	0	0	0	0	0	1	0	0	1	1	1	0	0	0
1811	Male	18	1	0	0	0	0	0	0	0	0	0	0	0	0	0	1	0	0	1	1	1	0	0	0
1812	Male	18	1	1	0	0	0	0	0	0	0	0	0	0	0	0	1	0	0	1	1	1	0	0	0
1813	Male	17	1	1	0	1	0	0	0	0	0	0	0	0	0	0	1	0	0	1	1	1	0	0	0
1814	Male	18	1	1	0	0	0	0	0	0	0	0	0	0	0	0	1	0	0	1	1	1	0	0	0
1815	Female	19	1	1	1	0	0	0	0	0	0	0	0	0	0	0	1	0	0	1	1	1	0	0	0
1816	Male	19	1	1	0	0	0	1	1	0	0	0	0	0	0	0	1	0	0	1	1	1	0	0	0
1817	Female	17	1	1	1	0	0	1	0	0	0	0	0	0	0	0	1	0	0	1	1	1	0	0	0
1818	Male	17	1	1	0	0	0	0	0	0	0	0	0	0	0	0	1	0	0	1	1	1	0	0	0
1819	Male	16	1	1	0	0	0	1	0	0	0	0	0	0	0	0	1	0	0	1	1	1	0	0	0
1820	Male	19	1	1	0	0	0	0	0	0	0	0	0	0	0	0	1	0	0	1	1	1	0	0	0
1821	Female	13	1	1	1	0	0	0	0	0	0	0	0	0	0	0	1	0	0	0	1	1	0	0	0
1822	Male	19	1	1	0	0	0	1	0	0	0	0	0	0	0	0	1	0	0	0	1	1	0	0	0
1823	Female	16	1	1	0	1	0	0	0	0	0	0	0	0	0	1	1	0	0	0	1	1	0	0	0
1824	Female	19	1	0	0	0	0	0	0	0	0	0	0	0	0	0	1	0	0	0	1	1	0	0	0
1825	Male	14	1	0	1	0	0	0	0	0	0	0	0	0	0	0	1	0	0	0	1	1	0	0	0
1826	Female	16	1	0	1	0	0	0	0	0	0	0	0	0	0	0	1	0	0	0	1	1	0	0	0
1827	Female	19	1	1	1	0	0	0	0	0	0	0	0	0	0	0	1	0	0	0	1	1	0	0	0
1828	Female	13	1	1	0	0	0	0	1	0	0	0	0	0	0	0	1	0	0	0	1	1	0	0	0
1829	Female	17	1	1	0	0	0	0	0	0	0	0	0	0	0	0	1	0	0	1	1	0	0	0	0
1830	Female	15	1	1	1	0	0	0	0	0	0	0	0	0	0	0	1	0	0	1	1	0	0	0	0
1831	Male	17	1	1	0	0	0	0	0	0	0	0	0	0	0	0	1	0	0	1	1	0	0	0	0
1832	Male	16	1	1	1	0	0	0	0	0	0	0	0	0	0	0	1	0	0	1	1	0	0	0	0
1833	Female	18	1	0	1	0	0	1	0	0	0	0	0	0	0	0	1	0	0	0	1	0	0	0	0
1834	Female	15	1	1	1	0	0	0	0	0	0	0	0	0	0	0	1	0	0	0	1	0	0	0	0
1835	Female	14	1	1	0	0	0	0	0	0	0	0	0	0	0	0	1	0	0	0	1	0	0	0	0
1836	Female	16	1	1	1	0	0	0	0	0	0	0	0	0	0	0	1	0	0	0	1	0	0	0	0
1837	Male	10	1	1	0	0	0	0	0	0	0	0	0	0	0	0	1	0	0	0	1	0	0	0	0
1838	Male	12	1	1	1	0	0	0	0	0	0	0	0	0	0	0	1	0	0	0	1	0	0	0	0
1839	Female	12	1	1	0	0	0	0	0	0	0	0	0	0	0	0	1	0	0	0	1	0	0	0	0
1840	Male	15	1	0	0	1	0	0	0	0	0	0	0	0	0	0	1	0	0	0	1	0	0	0	0
1841	Male	17	1	0	0	0	0	0	0	0	0	0	0	0	0	0	1	0	0	0	1	0	0	0	0
1842	Male	18	1	1	1	0	0	0	0	0	0	0	0	0	0	0	1	0	0	0	1	0	0	0	0
1843	Female	14	1	0	0	0	0	1	0	0	0	0	0	0	0	0	1	0	0	0	1	0	0	0	0
1844	Male	19	1	0	0	0	0	0	0	0	0	0	0	0	0	0	1	0	0	0	1	0	0	0	0
1845	Female	14	1	0	0	0	0	1	0	0	0	0	0	0	0	0	1	0	0	0	1	0	0	0	0
1846	Female	14	1	1	1	0	0	0	0	0	0	0	0	0	0	0	1	0	0	0	1	0	0	0	0
1847	Male	14	1	0	0	0	0	1	0	0	0	0	0	0	0	0	1	0	0	0	1	0	0	0	0
1848	Male	11	1	1	1	0	0	0	0	0	0	0	0	0	0	0	1	0	0	0	1	0	0	0	0
1849	Male	14	1	0	1	0	0	0	0	0	0	0	0	0	0	0	1	0	0	0	1	0	0	0	0
1850	Female	14	1	1	1	0	0	0	0	0	0	0	0	0	0	0	1	0	0	0	1	0	0	0	0
1851	Male	14	1	1	1	0	0	0	0	0	0	0	0	0	0	0	1	0	0	0	1	0	0	0	0
1852	Male	16	1	1	1	0	0	0	0	0	0	0	0	0	0	0	1	0	0	0	1	0	0	0	0
1853	Female	16	1	1	0	0	0	0	0	0	0	0	0	0	0	0	1	0	0	0	1	0	0	0	0
1854	Male	14	1	0	1	0	0	1	0	0	0	0	0	0	0	0	1	0	0	0	1	0	0	0	0
1855	Female	13	1	1	0	0	0	1	0	0	0	0	0	0	0	0	1	0	0	0	1	0	0	0	0
1856	Male	17	1	1	0	0	0	0	0	0	0	0	0	0	0	0	1	0	0	1	0	1	0	0	0
1857	Female	17	1	1	0	0	0	1	0	0	0	0	0	0	0	0	1	0	0	1	0	1	0	0	0
1858	Male	14	1	1	0	1	0	0	0	0	0	0	0	0	1	1	1	0	0	1	0	1	0	0	0
1859	Male	18	1	1	0	1	0	0	0	0	0	0	0	0	0	0	1	0	0	0	0	1	0	0	0
1860	Female	13	1	1	0	0	0	1	0	0	0	0	0	0	0	0	1	0	0	0	0	1	0	0	0
1861	Female	14	1	0	0	0	0	1	0	0	0	0	0	0	0	0	1	0	0	0	0	1	0	0	0
1862	Female	14	1	0	0	0	0	1	0	0	0	0	0	0	0	0	1	0	0	0	0	1	0	0	0
1863	Male	18	1	1	1	0	0	0	0	0	0	0	0	0	0	0	1	0	0	0	0	1	0	0	0
1864	Female	12	1	1	0	0	0	0	0	0	0	0	0	0	0	0	1	0	0	0	0	1	0	0	0
1865	Female	12	1	0	1	0	0	1	0	0	0	0	0	0	0	0	1	0	0	0	0	1	0	0	0
1866	Male	11	1	0	0	0	0	1	0	0	0	0	0	0	0	0	1	0	0	0	0	1	0	0	0
1867	Male	16	1	0	0	0	0	0	0	0	0	0	0	0	0	0	1	0	0	1	0	0	0	0	0
1868	Male	17	1	1	0	0	0	0	0	0	0	0	0	0	0	0	1	0	1	0	0	0	0	0	0
1869	Male	17	1	0	1	0	0	1	0	0	0	0	0	0	0	0	1	0	0	1	0	0	0	0	0
1870	Male	18	1	0	1	0	0	0	0	0	0	0	0	0	0	0	1	0	0	1	0	0	0	0	0
1871	Male	17	1	1	0	0	0	0	0	0	0	0	0	0	0	0	1	0	0	1	0	0	0	0	0
1872	Male	18	1	0	0	0	0	0	0	0	0	0	0	0	0	0	1	0	0	1	0	0	0	0	0
1873	Female	13	1	1	1	0	0	0	0	0	0	0	0	0	0	0	1	0	0	1	0	0	0	0	0
1874	Male	11	1	1	0	0	0	0	0	0	0	0	0	0	0	0	1	0	0	1	0	0	0	0	0
1875	Male	18	1	1	0	0	0	0	0	0	0	0	0	0	0	0	1	0	0	1	0	0	0	0	0
1876	Male	18	1	0	0	0	0	1	0	0	0	0	0	0	0	0	1	0	0	1	0	0	0	0	0
1877	Male	17	1	0	0	0	0	1	0	0	0	0	0	0	0	0	1	0	0	1	0	0	0	0	0
1878	Male	19	1	0	1	0	0	1	0	0	0	0	0	0	0	0	1	0	0	1	0	0	0	0	0
1879	Male	15	1	0	0	0	0	1	0	0	0	0	0	0	0	0	1	0	0	1	0	0	0	0	0
1880	Female	17	1	1	0	0	0	0	0	0	0	0	0	0	0	0	1	0	0	1	0	0	0	0	0
1881	Male	13	1	0	0	0	0	1	0	0	0	0	0	0	0	0	1	0	0	1	0	0	0	0	0
1882	Male	13	1	0	0	0	0	1	0	0	0	0	0	0	0	0	1	0	0	1	0	0	0	0	0
1883	Male	16	1	0	0	0	0	0	0	0	0	0	0	0	0	0	1	0	0	1	0	0	0	0	0
1884	Male	17	1	0	0	0	0	0	0	0	0	0	0	0	0	0	1	0	0	1	0	0	0	0	0
1885	Male	18	1	1	0	0	0	0	0	0	0	0	0	0	0	0	1	0	0	1	0	0	0	0	0
1886	Female	14	1	0	0	0	0	1	0	0	0	0	0	0	0	0	1	0	0	1	0	0	0	0	0
1887	Female	16	1	0	1	0	0	1	0	0	0	0	0	0	0	0	1	0	0	0	0	0	0	0	0
1888	Male	13	1	1	0	0	0	0	0	0	0	0	0	0	0	0	1	0	0	0	0	0	0	0	0
1889	Female	14	1	1	0	0	0	0	0	0	0	0	0	0	0	0	1	0	0	0	0	0	0	0	0
1890	Male	14	1	1	1	0	0	0	0	0	0	0	0	0	0	0	1	0	0	0	0	0	0	0	0
1891	Male	17	1	0	1	0	0	0	0	0	0	0	0	0	0	0	1	0	0	0	0	0	0	0	0
1892	Male	17	1	1	0	0	0	0	0	0	0	0	0	0	0	0	1	0	1	0	0	0	0	0	0
1893	Male	13	1	0	0	1	0	0	0	0	0	0	0	0	0	0	1	0	1	0	0	0	0	0	0
1894	Male	11	1	0	0	0	0	0	1	0	0	0	0	0	0	0	1	0	1	0	0	0	0	0	0
1895	Male	12	1	1	1	0	0	0	0	0	0	0	0	0	0	0	1	0	1	0	0	0	0	0	0
1896	Female	14	1	1	1	0	0	0	0	0	0	0	0	0	0	0	1	0	1	0	0	0	0	0	0
1897	Female	10	1	1	1	0	0	0	0	0	0	0	0	0	0	0	1	0	1	0	0	0	0	0	0
1898	Female	15	1	0	0	0	0	1	0	0	0	0	0	0	0	0	1	0	1	0	0	0	0	0	0
1899	Female	17	1	1	0	0	0	0	0	0	0	0	0	0	0	0	1	0	1	0	0	0	0	0	0
1900	Male	17	1	0	0	0	0	1	0	0	0	0	0	0	0	0	1	0	1	0	0	0	0	0	0
1901	Male	17	1	0	1	0	0	1	0	0	0	0	0	0	0	0	1	0	1	0	0	0	0	0	0
1902	Male	18	1	0	0	0	0	1	0	0	0	0	0	0	0	0	1	0	1	0	0	0	0	0	0
1903	Male	15	1	0	0	0	0	1	0	0	0	0	0	0	0	0	1	0	1	0	0	0	0	0	0
1904	Male	17	1	0	1	1	0	0	0	0	0	0	0	0	0	0	1	0	0	1	1	1	1	0	0
1905	Female	18	1	0	0	0	0	1	0	0	0	0	0	1	1	1	0	0	0	0	1	0	0	0	0
1906	Male	17	1	1	0	0	0	1	0	0	0	1	0	0	1	1	0	0	0	1	1	1	0	0	0
1907	Male	14	1	1	0	0	0	0	0	0	0	1	0	0	1	1	0	0	0	0	1	0	0	0	0
1908	Male	16	1	0	0	1	0	0	0	0	0	1	0	0	1	1	0	0	0	0	1	0	0	0	0
1909	Male	15	1	0	0	0	0	1	0	0	0	1	0	0	1	1	0	0	0	1	0	1	0	0	0
1910	Male	14	1	0	1	0	0	0	1	0	0	0	0	0	1	1	0	0	0	0	0	1	0	1	0
1911	Male	17	1	0	0	0	0	1	0	0	0	0	0	0	1	1	0	0	0	1	0	0	0	0	0
1912	Female	13	1	0	1	0	0	1	0	0	0	1	1	1	0	1	0	0	0	1	0	0	0	0	0
1913	Male	12	1	0	0	0	0	1	0	0	0	1	0	0	0	1	0	0	0	1	0	0	0	0	0
1914	Male	15	1	1	0	0	0	1	0	0	0	1	0	0	0	1	0	0	0	1	1	1	1	0	0
1915	Female	17	1	0	1	0	0	0	0	0	0	1	0	0	0	1	0	0	0	0	1	1	1	0	0
1916	Male	14	1	1	1	0	0	1	0	0	0	1	0	0	0	1	0	0	0	1	1	1	0	0	0
1917	Female	12	1	1	0	0	0	0	0	0	0	1	0	0	0	1	0	0	0	0	1	1	0	0	0
1918	Female	14	1	1	0	0	0	0	0	0	0	1	0	0	0	1	0	0	0	0	1	0	0	0	0
1919	Female	15	1	1	1	0	0	0	0	0	0	0	0	0	0	1	0	0	0	0	1	0	0	0	0
1920	Male	16	1	1	0	0	0	1	0	0	0	0	0	0	0	1	0	0	0	1	1	1	0	1	0
1921	Female	17	1	1	0	0	0	1	0	0	0	0	0	0	0	1	0	0	0	1	1	1	1	0	0
1922	Male	17	1	1	0	0	0	1	0	0	0	0	0	0	0	1	0	0	0	1	1	1	1	0	0
1923	Female	19	1	1	1	0	0	1	0	0	0	0	0	0	0	1	0	0	0	1	1	0	1	0	0
1924	Female	14	1	1	0	0	0	0	0	0	0	0	0	0	0	1	0	0	0	0	1	0	1	0	0
1925	Female	11	1	1	0	0	0	0	0	0	0	0	0	0	0	1	0	0	0	0	0	1	1	0	0
1926	Female	12	1	0	1	0	0	1	0	0	0	0	0	0	0	1	0	0	0	0	0	0	1	0	0
1927	Male	16	1	0	0	0	0	1	0	0	0	0	0	0	0	1	0	0	0	0	0	0	1	0	0
1928	Female	14	1	1	1	0	0	0	0	0	0	0	0	0	0	1	0	0	0	0	1	1	0	0	0
1929	Female	18	1	1	1	0	0	1	0	0	0	0	0	0	0	1	0	0	0	1	1	0	0	0	0
1930	Female	18	1	0	0	0	0	1	0	0	0	0	0	0	0	1	0	0	0	0	1	0	0	0	0
1931	Female	17	1	1	1	0	0	0	0	0	0	0	0	0	0	1	0	0	0	0	1	0	0	0	0
1932	Male	14	1	1	0	0	0	0	0	0	0	0	0	0	0	1	0	0	0	0	1	0	0	0	0
1933	Male	13	1	1	0	0	0	0	0	0	0	0	0	0	0	1	0	0	0	0	1	0	0	0	0
1934	Male	14	1	0	1	0	0	1	0	0	0	0	0	0	0	1	0	0	0	0	1	0	0	0	0
1935	Male	19	1	0	0	1	0	0	0	0	0	0	0	0	0	1	0	0	0	0	1	0	0	0	0
1936	Male	18	1	1	0	0	0	0	0	0	0	0	0	0	0	1	0	0	0	1	0	1	0	0	0
1937	Female	14	1	0	0	0	0	1	0	0	0	0	0	0	0	1	0	0	0	1	0	1	0	0	0
1938	Female	17	1	1	0	0	0	0	0	0	0	0	0	0	0	1	0	0	0	0	0	1	0	0	0
1939	Female	13	1	1	1	0	0	0	0	0	0	0	0	0	0	1	0	0	0	0	0	1	0	0	0
1940	Female	13	1	1	1	0	0	0	0	0	0	0	0	0	0	1	0	0	0	0	0	1	0	0	0
1941	Female	13	1	0	1	0	0	1	0	0	0	0	0	0	0	1	0	0	0	0	0	1	0	0	0
1942	Female	19	1	0	0	1	0	0	0	0	0	0	0	0	0	1	0	0	0	0	0	1	0	0	0
1943	Male	14	1	1	1	0	0	0	0	0	0	0	0	0	0	1	0	0	0	1	0	0	0	0	0
1944	Male	11	1	1	0	0	0	0	0	0	0	0	0	0	0	1	0	0	0	1	0	0	0	0	0
1945	Male	18	1	0	0	1	0	0	0	0	0	0	0	0	0	1	0	0	0	1	0	0	0	0	0
1946	Male	15	1	1	1	0	0	0	0	0	0	0	0	0	0	1	0	0	0	1	0	0	0	0	0
1947	Male	16	1	1	0	0	0	0	0	0	0	0	0	0	0	1	0	0	0	1	0	0	0	0	0
1948	Male	14	1	1	1	0	0	0	0	0	0	0	0	0	0	1	0	0	0	1	0	0	0	0	0
1949	Male	11	1	1	1	0	0	0	0	0	0	0	0	0	0	1	0	0	0	1	0	0	0	0	0
1950	Male	15	1	0	1	1	0	0	0	0	0	0	0	0	0	1	0	0	0	1	0	0	0	0	0
1951	Male	14	1	0	0	0	0	1	0	0	0	0	0	0	0	1	0	0	0	1	0	0	0	0	0
1952	Male	17	1	0	0	0	0	1	0	0	0	0	0	0	0	1	0	0	0	1	0	0	0	0	0
1953	Male	14	1	1	0	0	0	0	0	0	0	0	0	0	0	1	0	0	0	1	0	0	0	0	0
1954	Female	12	1	0	0	0	0	1	0	0	0	0	0	0	0	1	0	0	0	1	0	0	0	0	0
1955	Male	16	1	1	1	0	0	0	0	0	0	0	0	0	0	1	0	0	0	0	0	0	0	0	0
1956	Male	11	1	1	1	0	0	0	0	0	0	0	0	0	0	1	0	0	0	0	0	0	0	0	0
1957	Female	14	1	0	0	0	0	1	1	0	0	0	0	0	1	1	0	0	0	0	0	0	0	0	0
1958	Male	14	1	0	1	0	0	1	0	0	0	0	0	0	0	1	0	0	1	0	0	0	0	0	0
1959	Male	15	1	1	0	0	0	0	0	0	0	1	0	0	0	1	0	0	0	0	0	0	0	0	0
1960	Male	13	1	1	1	0	0	0	0	0	0	1	0	0	1	0	0	0	1	0	0	0	0	0	0
1961	Female	19	1	1	0	0	0	0	0	0	0	0	0	1	1	0	0	0	1	0	0	0	0	0	0
1962	Male	16	1	0	0	0	0	1	0	0	0	1	0	0	1	0	0	0	0	1	0	0	0	0	0
1963	Male	11	1	1	0	0	0	0	0	0	0	1	0	0	1	0	0	0	0	0	0	0	0	0	0
1964	Male	16	1	1	1	0	0	0	0	0	0	0	0	0	1	0	0	0	0	0	1	1	1	1	0
1965	Male	17	1	0	0	0	0	1	0	0	0	0	0	0	1	1	0	0	0	1	1	1	1	0	0
1966	Male	19	1	0	0	0	0	0	0	0	0	0	0	0	1	0	0	0	0	1	1	0	0	0	0
1967	Female	17	1	0	1	0	0	1	0	0	0	0	0	0	1	0	0	0	0	1	1	0	0	0	0
1968	Female	15	1	1	0	0	0	0	0	0	0	0	0	0	1	0	0	0	0	0	1	0	0	0	0
1969	Female	12	1	1	1	0	0	0	0	0	0	0	0	0	1	0	0	0	0	0	1	0	0	0	0
1970	Male	13	1	0	1	1	0	0	0	0	0	0	0	0	1	0	0	0	0	0	0	1	0	0	0
1971	Female	12	1	1	1	0	0	0	0	0	0	0	0	0	1	0	0	0	0	1	0	0	0	0	0
1972	Male	15	1	0	0	0	0	0	0	0	0	0	0	0	1	0	0	0	0	0	0	0	0	0	0
1973	Female	16	1	1	1	0	0	0	0	0	0	1	0	0	1	0	0	0	0	1	0	0	1	0	0
1974	Female	17	1	1	0	0	0	0	0	0	0	1	0	0	1	0	0	0	0	0	1	0	0	0	0
1975	Male	15	1	1	0	0	0	1	0	0	0	1	0	0	1	0	0	0	0	0	1	0	0	0	0
1976	Female	14	1	1	1	0	0	0	0	0	0	1	0	1	0	0	0	0	0	0	1	0	0	0	0
1977	Female	12	1	1	1	0	0	0	0	0	0	0	0	1	0	0	0	0	0	0	1	0	0	0	0
1978	Male	19	1	0	0	0	0	1	0	0	0	0	0	1	0	0	0	0	0	0	0	1	0	0	0
1979	Male	14	1	1	0	0	0	0	0	0	0	1	1	0	0	0	0	0	1	0	0	0	0	0	0
1980	Male	17	1	0	0	0	0	0	0	0	0	0	1	0	0	0	0	0	0	0	1	0	0	0	0
1981	Female	18	1	0	0	0	0	1	0	0	0	0	1	0	0	0	0	0	0	0	1	0	0	0	0
1982	Female	14	1	0	0	0	0	1	0	0	0	0	1	0	0	0	0	0	0	0	0	0	0	0	0
1983	Male	16	1	0	0	0	0	1	0	0	0	0	0	1	0	0	0	0	0	1	1	1	1	0	0
1984	Male	17	1	1	1	0	0	1	0	0	0	0	0	1	0	0	0	0	0	1	0	0	1	0	0
1985	Female	17	1	0	0	0	0	1	0	0	0	0	0	0	0	1	0	0	0	1	1	0	0	0	0
1986	Male	17	1	0	1	0	0	0	0	0	0	0	0	0	0	1	0	0	0	0	1	0	0	0	0
1987	Male	14	1	0	0	0	0	1	0	0	0	0	0	1	0	0	0	0	0	0	0	1	0	0	0
1988	Male	17	1	0	0	0	0	1	0	0	0	0	0	1	0	0	0	0	0	1	0	0	0	0	0
1989	Male	15	1	1	0	0	0	1	0	0	0	0	0	1	0	0	0	0	0	1	0	0	0	0	0
1990	Male	17	1	1	1	0	0	0	0	0	0	0	0	1	0	0	0	0	0	0	0	0	0	0	0
1991	Male	17	1	0	0	0	1	0	0	0	1	0	0	0	0	0	0	1	1	0	0	0	0	0	0
1992	Male	14	1	0	0	0	1	0	0	0	1	0	0	0	0	0	0	1	1	0	0	0	0	0	0
1993	Female	14	1	0	1	0	1	0	0	0	1	0	0	0	0	0	1	0	0	0	1	0	0	1	0
1994	Male	19	1	0	0	0	0	0	0	0	1	0	0	0	0	0	0	0	1	0	0	0	0	0	0
1995	Female	18	1	0	1	0	1	0	0	0	1	0	0	0	0	0	1	0	0	0	1	0	0	0	0
1996	Male	14	1	1	0	0	0	0	0	1	0	1	0	0	0	0	1	0	1	0	0	0	0	0	0
1997	Female	18	1	0	1	0	1	0	0	1	0	0	0	0	0	0	1	0	0	0	0	0	0	0	0
1998	Male	14	1	0	0	0	1	0	0	1	0	1	0	0	0	1	0	0	0	0	0	0	0	0	0
[truncated: 2,745 more rows]
