# Supplementary material for: Non-specific low back pain: cross-sectional study of 11,423 children and youth and the association with the perception of heaviness in carrying of schoolbags
Source: PeerJ journal article supplement (doi:10.7717/peerj.11220), 2021-05-04
Supplement: Supplemental_File_2.pdf [file Supplemental_File_2.pdf]

# KWESTIONARIUSZ

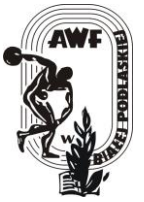

Szanowni Państwo!

Zwracamy się z uprzejmą prośbą o udzielenie odpowiedzi na postawione niżej pytania. Ankieta jest anonimowa. Celem badań jest zgromadzenie informacji, na temat częstości występowania i czynników ryzyka bólu kręgosłupa. Wyniki wykorzystane zostaną wyłącznie do celów naukowych.

W pytaniach oznaczonych \* można wybrać więcej niż jedną odpowiedź, w pozostałych należy wybrać tylko jedną z zaproponowanych odpowiedzi.

Zaznacz kółkiem wybraną przez Ciebie odpowiedź, np.

k)

Dziękujemy

Dzisiejsza data.....

Płeć:  Kobieta /  Mężczyzna Pełna data urodzenia (dzień, miesiąc, rok): .....

## 1. Odczuwam, że mój bagaż do szkoły jest:

- a) bardzo ciężki
- b) umiarkowanie ciężki
- c) lekki
- d) zależy w które dni

## 2. Czy odczywałeś/aś dolegliwości bólowe kręgosłupa w ostatnich 12 miesiącach?

- a) nie
- b) tak, rzadko (1-2/12 miesięcy)
- c) tak, często (3-6 razy/12 miesięcy)
- d) tak, bardzo często i ciągle (więcej niż 1-2 razy w miesiącu)
- e) tylko w czasie miesiączki (menstruacji)- dotyczy dziewcząt

Osoby, które w powyższym pytaniu (nr 2) zaznaczyły odpowiedź „a) nigdy”, nie udzielają odpowiedzi na kolejne pytania. Dziękujemy!

## 3. Ból mojego kręgosłupa zlokalizowany jest w odcinku \*:

a) szyjnym

b) piersiowym

c) lędźwiowym

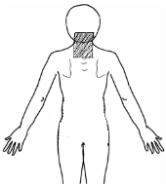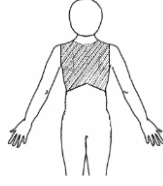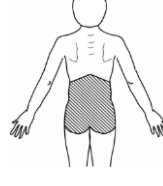

## 4. W jakich okolicznościach pojawia się ból kręgosłupa

- a) podczas podnoszenia ciężkich przedmiotów
- b) podczas noszenia plecaka szkolnego
- c) podczas ćwiczeń fizycznych
- d) na lekcji wychowania fizycznego
- e) podczas siedzenia
- f) podczas stresu psychicznego
- g) zmiennej pogody
- h) inne (jakie).....

## 5. Czy korzystasz z pomocy lekarza z powodu dolegliwości bólowych kręgosłupa?

- a) tak
- b) nie

## 6. Z bólami kręgosłupa radzę sobie przez:

- a) przyjmowanie zaleconych przez lekarza leków
- b) przyjmowanie leków dostępnych bez recepty
- c) zabiegi w gabinecie fizykoterapii
- d) zabiegi fizjoterapeutyczne inne niż fizykoterapia (gimnastyka, ćwiczenia zalecone przez fizjoterapeutę)
- e) odpoczynek
- f) inne (jakie).....

## 7. Jak myślisz, co może zmniejszyć ból kręgosłupa?

- a) nie wiem
- b) zwiększenie aktywności fizycznej
- c) zmniejszenie ciężaru plecaka szkolnego
- d) zmniejszenie liczby godzin spędzanych w pozycji siedzącej
- e) dostosowanie sprzętu szkolnego (biurko, krzesło) do wysokości ciała
- f) zwiększenie środków przeciwbólowych
- g) inne (jakie).....
